# Supplementary material
Source: publisher figshare collection journal article supplement (https://gsajournals.figshare.com/ndownloader/files/14645210)
Supplement: Supplementary file 1 [file 14645210]

## Sheet: U_Wisc_Yeast_v1-2_Manifest(2)
Table S3. Reference genome sequence for each amplicon generated by the yeast custom spliceosome targeted sequencing panel. From Illumina, Inc.
Gene	TargetA	TargetB	Species	Build ID	Chromosome	Start Position	End Position	Probe Strand	Sequence
PRP45	YAL032C.line.1.chrI.83335.84474_tile_1	YAL032C.line.1.chrI.83335.84474_tile_1	Saccharomyces cerevisiae	R64-2-1	chrI	83307	83730	+	CCTAGGCGCCATAGTTATCCGATTTATCATCGGATTCAGCTTTAGTAAACTGAATGGGGCCGTGAGAACCACTGGCACCTTCACTCTTAACATTGACCGCTTCGTCCAGCTTTTCGTAGTTGGTCTTGTATATGCTTTCAATATCTTGTTGGACGAACAGTGGGTTGTCATAAACCTGGTCTTCATGCCTTTTGGCGGAGGCATTTGCCCCTCTTGTGAAAAATCTTGAATCGTACTGCAGATCCGGTTGTTCTGAACGCTTTGCTGCGCCCAGAATTATCTTTTCGGATACGTCTCTTCCTTGAGAGTACGCCAGCTCTTTTAGTCTGGCCACTGTGCTCGTTTGCTTTTTGGGCTTAACTATTGCTCCC
PRP45	YAL032C.line.1.chrI.83335.84474_tile_2	YAL032C.line.1.chrI.83335.84474_tile_2	Saccharomyces cerevisiae	R64-2-1	chrI	83677	84123	-	GTTGGGAAGAAGGCGAGAAAGGTTGTAGCACCCACAGAAAACGACGAAGTCGTGCCTGTTCTCCATATGGATGGCAGCAATGATAGGGGAGAAGCTGATCCAAATGAGTGGAAGATACCTGCAGCTGTGTCAAACTGGAAAAATCCAAATGGTTATACCGTGGCCTTGGAAAGACGTGTAGGTAAAGCTCTTGACAACGAAAATAATACCATCAACGATGGGTTTATGAAGCTCTCCGAAGCGTTAGAAAACGCTGACAAGAAGGCAAGACAAGAGATCAGGTCCAAAATGGAATTGAAGCGGCTTGCTATGGAACAGGAAATGCTTGCTAAAGAATCTAAATTGAAAGAATTGAGCCAACGAGCCAGATACCACAACGGGACTCCGCAGACG
PRP45	YAL032C.line.1.chrI.83335.84474_tile_3	YAL032C.line.1.chrI.83335.84474_tile_3	Saccharomyces cerevisiae	R64-2-1	chrI	84069	84493	+	CGAACCTTGGCAACAATGGATCCATTTGCTTGGACACTACCTCAATATGGTGGCTGTTGTTCAATAATAGATTCGCGGGTGCCTGATGTGTTTCGGTGACGTACCTTGATGATGCCCTGTTATTTGAGTTGGCTAGTTTCGCATTCACAAGCCGCTGAATGTATGACTTGGTTCTTGCTGTACATTCTTGGATTTCTGCTTTCGTTGGCAAAGGAACCGATAGTTCGAAATTAGACTGTCTCTTTGGAATAAAATCATCGAGCTTAACGTTTTTAGCGATTTGGTCAGTCAATATTGCCGGCTCAACGCGATCTGAGCTCAAAGCCGTCGAAACTCGTCCTTGAGAATGTTTTGGAGGTGGTAGTCTGTTA
PRP45	YAL032C.line.1.chrI.83335.84474_tile_4	YAL032C.line.1.chrI.83335.84474_tile_4	Saccharomyces cerevisiae	R64-2-1	chrI	84439	84867	-	GCTCCGAAACTACCATGATGCCGTTTGGGATCGAAATCAAAGAGTCGACCGGGCATAGAATAGCTTCTAAAATCAGAAGCAAATTGAGATAACTCCGCACCTTATAAAAACAACTCTTTATGTCCCTGGAAAAAAAAAAGAATACATATCTAATACTATTCATATCCTTCATTGTTCTTGTCTGATGATTCAAAAGTACTCATACTATTTTTTAATATTTAATCTTTTACCTTAACGTATTATTGTAATTCTTCACGAATTTGATTTTTCCCCAGCTAAAAAGTTGATGAAAGAAGTTCAAATTATGGGGTTATTGACACATGGCAGCTCTGAGCCGAGAGGACGTATCAGCAACCTCAACCAAATATGTTTAGT
AAR2	YBL074C.line.2.chrII.86722.87789_tile_1	YBL074C.line.2.chrII.86722.87789_tile_1	Saccharomyces cerevisiae	R64-2-1	chrII	86692	87091	+	CGTTATGGCCTTTGGTAATAGAGACCGCCAACAATGGTAGGGTTGTGCTCATCATCCTCGTCATCCCTTTCTTCATCACTGATACCGTAAATAAGAGCGTCGTCTTCATTGTCTTTACCAAGCAATTCTGGATATTTGTTTTCCATTATCTTTTCTGTGTTGTGTAGGGAGTTTTTTTGAAATGACGAATACAGACAAATATTCCAAACTCGTTCATTCAACAAGATGTCTGAGTATTGTTCAGGCAATGTCTTTATCTGATAATATAAGATTTCGTCTAATTTATCGAGCATATGTTTAGGCACCGTAGCGCTTGAACATATCAGTTCGATCATAGCATGCCATT
AAR2	YBL074C.line.2.chrII.86722.87789_tile_2	YBL074C.line.2.chrII.86722.87789_tile_2	Saccharomyces cerevisiae	R64-2-1	chrII	87038	87466	-	TACCGAGTTTGTGCAGATGGATAAAATCCGAAAGATAGTAAGGAAAGATGAAAACCAGTTCTCTTACGTAGATTCTTCGATGACCACAGTTCAAGAAAATGAGCTGCTAAAATCCAGCTTGCAAAAAGCAGGTTCTAAAATGGAAGCCAAGAATGAAGATGATCCTGCACATTCTTTAAACTATACAGTAATAAACTTCAAATCTAGAGAAGCCATAAGGCCTGGCCATGAAATGGAGGATTTTTTAGACAAGTCTTACTACTTGAACACTGTAATGCTACAAGGAATTTTTAAAAATTCAAGTAATTATTTTGGGGAGTTGCAGTTTGCGTTCTTAAATGCCATGTTTTTTGGTAACTACGGGTCGAGTTTGCA
AAR2	YBL074C.line.2.chrII.86722.87789_tile_3	YBL074C.line.2.chrII.86722.87789_tile_3	Saccharomyces cerevisiae	R64-2-1	chrII	87412	87858	+	AAGATTGTACCAGGTATCATCTTCGTCAATTTTCGGATAAGAAACCATCATCTGCCGTTCCTTGAAGTTGTGAACAATATTCTCGAATTTTGCGCCATCCCTTTCTTCCATCATTTTGTAAAGGCCATCTTTAGGATCATACTGAATGTAAAAGTTTCCCATTCTACAGTCAAACCAGTAGCCATACCTCATGCTGGAATTATCTGCATGCTGAAAATGAATGACATGAACGTGTCCAATGGGGATGTCCTTGATTCCGTGAAATGGCTGATTCTCCTTGACATTAAAGGAATACTGATCGATCCCTATAGTTACCTCAATCGGAGCAGATGTAAATGGTACAGTATTCATTGCAGGCTTCCGATATTTTATTTTTTAGCCCCATGTCCCAGC
LSM2	YBL026W.line.3.chrII.170623.171038_tile_1	YBL026W.line.3.chrII.170623.171038_tile_1	Saccharomyces cerevisiae	R64-2-1	chrII	170595	171033	+	GTATGCTTTTCTTCTCCTTTTTCAAGACTTTAGTTGACCAAGAAGTGGTCGTAGAGGTATGTTCATAATGATTTACATCGGAATTCCCTTTGATACAAGAAAACTAACGGGTATCGTACATCAATTTTTGAAAAAAGTCAAGTACTAACGTTTGTTTACCCCTGTTTATTGTGTTTCCACTCAGTTAAAAAACGACATTGAAATAAAAGGTACACTACAATCAGTTGACCAATTTTTGAATCTGAAACTAGACAACATATCATGCACAGATGAAAAAAAATATCCACACTTGGGTTCCGTAAGGAATATTTTTATAAGAGGTTCAACAGTCAGGTACGTTTACTTGAATAAGAACATGGTAGATACGAATTTGCTACAAGACGCTA
LSM2	YBL026W.line.3.chrII.170623.171038_tile_2	YBL026W.line.3.chrII.170623.171038_tile_2	Saccharomyces cerevisiae	R64-2-1	chrII	170979	171385	-	ATTCGCTTTTCCATCAAGCGCATTTAGTAAAACAAAACAAAACCTCATAATGAATTTCTTGGGATAAAATGGGGCAAAAAAAAAGAATTCCTCATCAGTCTACGTAGCTTACGCTCTGGCCAAAAAAATTTTGGATGACCACTTGACAGATATCACACCAAGTTATTTCTCCTAACGCTCGGAACCGGATAATTAATACAAACCGTTGAATCATCTTATGGCCTACATATATACATATACATATAATCTCAATATCCTAAAATGATACTCGTGTAAAAAACTAATGAGAAAAAATGCCATGAGGATAGACTGCATAATTCTTATTTTCTTTCAGTCATTACCTCCCTTCTGGT
PRP6	YBR055C.line.4.chrII.344602.347301_tile_1	YBR055C.line.4.chrII.344602.347301_tile_1	Saccharomyces cerevisiae	R64-2-1	chrII	344572	345018	+	TTTATTTGTCATTCATCAAGCGCAATAAAATCTCTCTAGGTGTGCAGTATTGCATTTTTACGTTCTTGGAGGCGGCTATCCATTCGGGTCCGTAAGTAGGCTCACATTGATCGAACATATTGTAGAGATCAACAGTATCCTTGCCTAACCTTGCATATGTCCTAAATAGCCAAACCCATGTATCTCCGTAACGCGAGCACTTTTTCAGAGCTCTTTCTAACCATTTTAATGATGTTTCATATTGCGCTTCTGCATAAAAGGATACTCCAATCTCCAAAAGAACGCGATGATCGTTTTGTGTCCTTCTTAAAGCATCTTGAAAAATTGTTTTTTTTAACGAACTTTTGTTTCCATGCTTAAACAGCTTGATTTGCTCCACCCAAAGTAAAGC
PRP6	YBR055C.line.4.chrII.344602.347301_tile_2	YBR055C.line.4.chrII.344602.347301_tile_2	Saccharomyces cerevisiae	R64-2-1	chrII	344964	345384	-	AATGAAGAGGCTATAAAATTCTTGAATGAGAGATGTTTGAAATCATTTCCCATCTGCCACAAATTTTTTTTACAGCTGGGTCAAATTTATCATTCCATGGGCAATATTGAAATGAGTAGAGAAACCTATTTGTCTGGTACAAGGTTAGTGCCCAATTGCCCTTTATTATGGGTTTCCCTATCAAAGATTGACGAGATTGATCTAAAAAATCCAGTAAGGGCAAGATCAATTTTAGATAGAGGATTGTTAAAAAATCCTGACGATGTATTATTTTACATTGCTAAAATCCAAATGGAAATAAGACTTGGTAACTTAGATCAGGCGGAGTTACTCGTCACACAGGCATTGCAAAAGTTTCCAAGCAATG
PRP6	YBR055C.line.4.chrII.344602.347301_tile_3	YBR055C.line.4.chrII.344602.347301_tile_3	Saccharomyces cerevisiae	R64-2-1	chrII	345328	345770	+	TCAGATCTTGGTACCGCAGAAAGTTTACGTATTTATAATATAATCTTTCCGTGCCACTGATCTTAAAATCCTCTAAAGAGGAGAAAGTTTGCTGAAAAAAATCTCGTAATTCATCAAGTTGTAGTGAACGACCTAATAACTTTATCTTGAAAAAGCGTAAATCCAAATTATGCGGGGCGAAATCTATAATCTGGTCAATCAAAACTAGTGTTTGCCTAGTATCCCCTTTTTGGGCCTTCCAATATTCGCTTACATACATCATTAACAAGCCAGGGCTTTTCTCCCTCATATTTGCTCGTATATCATCACTATTCTTGGTCTGAAATAGCAGCTCCTGGAAAAATGCTAATAACTCTTCAATTTTATGGTAGCTTTCAGTGGCCATTT
PRP6	YBR055C.line.4.chrII.344602.347301_tile_4	YBR055C.line.4.chrII.344602.347301_tile_4	Saccharomyces cerevisiae	R64-2-1	chrII	345716	346115	-	TACACTCTTGGAAGAACGAAATAACCCAGATATACCTGTAGATAAACTAGTTAGTTTGCTCAAGGAGGGTTTATTGGAACTCTCTAAAAATGGGTACAAAGCGACCTTGTCAGCATGGTTGAAACGTGCAGAGGCTCTAAATGATGCGCCCAATTCAAATTTAACCTGTCAAGCCATCGTTTACGCTATATTAGAATGGTTAAGAGAAAGTGGCGAGTATGAGTCTGAGTTGAATAATGTTGATCAGATATTAGAAAAAATGCCACACTCAAAGGTACAAATTGCTGTCTTAAAAAAGCTTATTCAGTGGGATCCTTGTGATACAGTTCTTTGGTCTAGACTGAA
PRP6	YBR055C.line.4.chrII.344602.347301_tile_5	YBR055C.line.4.chrII.344602.347301_tile_5	Saccharomyces cerevisiae	R64-2-1	chrII	346060	346460	+	AGAGATAATCCAAATTTCCGGTTCTTGCGGAAGGATTTTTCTGAAGGAATTCAAAGTCATTTTAGCATTATGATAGCTTTGCAAATTAGTATATGCAGTCAAGAGATCCATACTTTGTGGAATAAATTGTGTGGCTTTCTCTAACATTTTTATAACTTGCGCTTTGTCAGCTTCAAAACTGACAGCTAGCTTCCATAGGCCCTCATCTCGAGGAATCTCTTGCAGTGCTTTTCTCACTACTCTATATTTGTTAACCGTTGTGCTTTCCAAATCAATAGCTTTGAACCAAAGAAGCGGAGACGTTGGATTAAAATTTATTGCCGTTGCCACTAATGTTTTACAGTAGT
PRP6	YBR055C.line.4.chrII.344602.347301_tile_6	YBR055C.line.4.chrII.344602.347301_tile_6	Saccharomyces cerevisiae	R64-2-1	chrII	346406	346816	-	ATCTCAAATAGATGAGAATCTTGCACAATTAACGAAGAATGCAAGTAACCCTATACAGGTTAATAAACCGAACGCTGCTACCGATGCCCTAAGTTACTTAAAGGACTTAGAAAACGATAGAGTAAATTCTCTCTCAGACGCAACGTTAGAAGATTTACAGAAAATGCGCACAATTTTAAAGTCATACAGAAAGGCCGATCCAACAAATCCACAGGGTTGGATAGCTTCTGCCAGATTAGAAGAAAAGGCAAGAAAATTTTCAGTAGCAAAAAAAATAATAGAAAATGGTTGCCAAGAGTGCCCTCGAAGCTCCGATATTTGGCTAGAAAACATTAGACTACACGAATCTGATGTTCA
PRP6	YBR055C.line.4.chrII.344602.347301_tile_7	YBR055C.line.4.chrII.344602.347301_tile_7	Saccharomyces cerevisiae	R64-2-1	chrII	346762	347190	+	TTGCAATAATTTTTCTCGTTCTTCCGTTAATTTATTTAAATCAACATTCCCAGGTATTAGCGAATCCGGTGCAGCATAAGTTTTTCTGTTTAATTGCTCTTGAATTCTATTTCTCTTGTTTCTTCTTGTAAAATCTGTGGCATCCGGAATATCCATCCACTCACTCTCCGTTACAGCAGCTAATGATTCTTTCAAATCGGCAAATTGCCGTTTCACGTTTGAAGAATCAACTGAATTGTCATCATCCTTTTCATTAGCTCTTTTCTTTTTCTTTTGTGCTAATTTCAATTCAAGCGTTTTGAATACATTTGCAGCTTCATCATCTTCATCATCTTTCGGTTGGCTTTGAAGATGGTTGTTCAAATTTTCACGGTA
PRP6	YBR055C.line.4.chrII.344602.347301_tile_8	YBR055C.line.4.chrII.344602.347301_tile_8	Saccharomyces cerevisiae	R64-2-1	chrII	347136	347548	-	GGAGACCTTTATGAAATGATGGCGTTTCTTCTTTTAATAAATAATGTAACGAAAGTATTTTTAAAAGTCTTCTTTACCGTTGATAGAACCTTGGGCTAATTTAACCAGTACATTTATAGTGTGTCAGATTGTTCTATTAAGCAAAAAAAAACGAAAAATTTCAGAAAATATACGGGTGAGTTGACATAAAGAGTTTAACAGCAAGAAAACGTCACATTTTATGGAGAGGCCATCTTTTTTGGATCAAGAACCACCTGCAGGTTACGTACCAGGTATTGGTCGTGGAGCCACTGGATTTTCAACAAAAGAAAAGCAAGTGGTTAGTAATGATGACAAAGGAAGAAGAATACCGAAAAGGT
ECM2	YBR065C.line.5.chrII.368584.369678_tile_1	YBR065C.line.5.chrII.368584.369678_tile_1	Saccharomyces cerevisiae	R64-2-1	chrII	368554	368966	+	ATCTATATTGTTAACTTGTTAGCGCGAGGTTTCGATTTCTTTGATCTGTCCTTATGAACTTTTTTTGATGTCTTTTTCTTGTCATTCTTTGCGTTATCTGTGCTTTTTGTAGGAAAAGAAAGCCCTAGCTCCAACTGAATAAGCTTATTCAAACTTAAACTAAGTTTTATATTTTCTGCAGTGTTGGTTCCGAATGACGCAGCTGAAAAGCCAGACGACCACGGAATGATAAAGATTCTAAAACGGTCAATAAGTAAAACTCCTCTCTTTAGGCCCTTTGGTGTGACAAGTGTCTCACTTATTTTACTGACAAACCGCTCCCCCAATTCACTAGATTGAAATCTTAGGCCACCACACT
ECM2	YBR065C.line.5.chrII.368584.369678_tile_2	YBR065C.line.5.chrII.368584.369678_tile_2	Saccharomyces cerevisiae	R64-2-1	chrII	368912	369321	-	TCCGTCAGAAGCAGATAATATCGTTGATAAATTGAAAAATATACTTCTGCGAGCAACATCAGATGGCCCAAGTACTCCGTTAATAAAAAACACAACTGCATTGTATAAAAATGAAAAAGGTGCAAATGAGGTCAAAAACTTGGAAAAGTACGCGTCCGTGGACATTTCTCATATTTTGAAGAAACTACCCTTGAATGAATCGTTTTTAAAAAACCCCTCCACCAAATCATTTTTTCTGTATAATATTGATGCCTCGATCCCTGAATGGAAAATAACTGATACAGTTTCGCAATTATTGGGTATAAAGAAATGGAAGGATGGAAATTCATTGTCATTAATAGTCAACCACAAGGCGAA
ECM2	YBR065C.line.5.chrII.368584.369678_tile_3	YBR065C.line.5.chrII.368584.369678_tile_3	Saccharomyces cerevisiae	R64-2-1	chrII	369268	369672	+	ATCACTCGTAATCTGAGCTCCTCCTAATTTCACGTTTTTTAGTGACAGAAACCTTTTCATCATGTCGTTTTTTGCTTCCTCCGTCATAACGTTTTCCTCGTTCACAAGGGATATTAAATGATCCCGCAGTTGTATAGGGATGTGCCATCTTGAATCAAGCATACAGCATTGACAAATGTTTCTCTGAGTGGCGCACCGTACACATATTAATGTTTTAATGATATTATTGCTTCGTTTAGACGTCTTAAAATGGTATAAGGTGAACGGTAAGGTACAAATCTTACATTCAGAGCCTTGTGGAATTTTAGTCATTCGTATATTAGCCTCATCACCTAAGCACTGCTCACATAT
ECM2	YBR065C.line.5.chrII.368584.369678_tile_4	YBR065C.line.5.chrII.368584.369678_tile_4	Saccharomyces cerevisiae	R64-2-1	chrII	369618	370038	-	TTAAATATTCAAATAACGTACAAATAAAAGACTGATAAATAGTAATAAAACTAAGCGGGTTAGTAATACTCACCAAGAACAATAGCAGGAACGATAGTCGGTTCTCTTTCGTAATTTTTTTAAGTCACAACCCGGAGGGACGTGAAGTTTCAAACCTTATTCATTCCGGGATTACCCTCTCCTGTGATGACGTTTAGGCAATAAGGACTAAAAAAAAAAAAAAGAAATGCTATGGCAAATTTTATTGATAGAAGTGGTAATGATGATGGAAGGGCTTTTGAGCAGGTGAATAGAAGGTAGCTAACGGAAAAGAGTTATTGCACCCTTAATATAATGAATGATGAAATTAATGAGCCACCGCCCAATA
EXO84	YBR102C.line.6.chrII.445062.447323_tile_1	YBR102C.line.6.chrII.445062.447323_tile_1	Saccharomyces cerevisiae	R64-2-1	chrII	445034	445472	+	TTTAGCGAATTTTATCACTGTTCTTTTTGATAAACTCGTCCAATTTGTAGACAAAATCCAAACCTACGGCCTTCAATCCATCTATCTGTTTTCTGGATGACTTAATGGACCCTGGGGATAACATTTCATCATTCAGTAATTGCTTGTCTATCAATTTGAAGTGATTATCCACTTCGTCGCTACACCAATCTACTAGGATGGAAGAAATCTTAGCCCCGAGTTCTTTGAAAATATCCTGGAAGTCCTCCACTGTTTTTTTAATGGTTTGGAACCTGATAACAGCCAATTGAGTCAAATAGTTCGTAGGATTGTCCACTGATCCAATCTGTAGAATCAAATCTTGAATGAAATTAGATCTATTCTGTAAGAATAGGTCAAGAGCT
EXO84	YBR102C.line.6.chrII.445062.447323_tile_2	YBR102C.line.6.chrII.445062.447323_tile_2	Saccharomyces cerevisiae	R64-2-1	chrII	445414	445816	-	ACCTAACTCTATCAATGCATTCGAGGCCAAGGTCCAGAGATATGAGTTCAACCGCCCAGAGGCTTAAATTCCTGGATGAAGGCGTGGAAGAGATAGATATTGAATTAGCTAGGCTTAGGTTTGAAAGTGCCGTGGAAACATTATTGGATATTGAATCACAATTGGAGGATCTTTCTGAAAGAATTTCTGATGAAGAGTTAATGTTACTTAACCTGATATCTTTAAAAATCGAACAAAGAAGAGAGGCCATTTCTAGCAAACTTTCTCAGAGCATTTTATCATCGAATGAAATAGTGCATTTGAAAAGCGGTACTGAAAATATGATTAAGTTAGGATTACCAGAGCAA
EXO84	YBR102C.line.6.chrII.445062.447323_tile_3	YBR102C.line.6.chrII.445062.447323_tile_3	Saccharomyces cerevisiae	R64-2-1	chrII	445762	446188	+	TTCTGCAAAAGATATTGATCCATTGCGCCTGTTACATTTCGGCCAGGAGTGATTGAACCCCCCATACTACGTCTTTTGTTTTTGTTAGGGCTTCTGTTGTTTTCTCTACCTGGGGTTTGTTGCGTAGATTGCAAATATCTAAAGGACTCTCTAATACGTTTAGAGTTCTCCTCTTCTACATGGAATATGTCGCACAAATCATCCTTAGCCTTTCTTATAACGTCCAACAACCTAGAGCATTCGTCTGCGTCTCTACATTCATACAAACTTGAATTCGAATTGCTAAACTTGAAAAGTAGCCTCTTAGTGGAAAATTCCTCTTGCGTGACAGTGACATCCTTTAAAGGATAGCACTGGCTTACTATAAAGTCAT
EXO84	YBR102C.line.6.chrII.445062.447323_tile_4	YBR102C.line.6.chrII.445062.447323_tile_4	Saccharomyces cerevisiae	R64-2-1	chrII	446134	446553	-	AGGTTACAATTGCAGGATCAAATAGATCAAGAGAGACAAGGCAATTTTAACAATGTTGAAAGTCATTCTAATAGTCCAGCGTTACTTCCGCCTTTGAAAGCAGGACAAAATGGGAATCTCATGAGGAGGGACAGATCGAGCGTCTTGATATTAGAGAAATTTTGGGATACGGAACTGGATCAGCTGTTTAAGAACGTTGAAGGTGCTCAGAAGTTTATCAATTCTACGAAAGGAAGACATATTTTAATGAATAGTGCCAATTGGATGGAATTAAATACTACCACTGGTAAACCCTTGCAGATGGTACAGATTTTCATTTTGAATGATTTGGTACTTATCGCCGATAAATCAAGAGATAAGCAAAA
EXO84	YBR102C.line.6.chrII.445062.447323_tile_5	YBR102C.line.6.chrII.445062.447323_tile_5	Saccharomyces cerevisiae	R64-2-1	chrII	446498	446930	+	TTTTTTCAGCTATTTTGGTGCACTGATCCAAAACCTCGTTTAAATCATTTATATTTGCTCTAACCCTTTTAAGCTCCAACATAGCAACATTTAGGTCGTTGTTTACCGTCATGATTTCGTTATATGATTTATTGATATTTAACTTTACTTCTTCTTGGACCTGTATCGATAAATCTGTTAAATTTGAGGTAAATTTATCAATAGTAATGGCACTCGCATTGCCTAGTTTATCATGAACAAAATCTTTAGCATTAAAATGCGGGTTTGCCAACATCTTTCTTAGCGACGTGCTATTATTGAAAGGATCATTACTGCCGGAAGGATTGACAGTATTTCGCATTGCTGATCTAGCAGGCACCTTATTATAGGAGCTGTCGTT
EXO84	YBR102C.line.6.chrII.445062.447323_tile_6	YBR102C.line.6.chrII.445062.447323_tile_6	Saccharomyces cerevisiae	R64-2-1	chrII	446876	447300	-	GAAGTCTGCAAGCTCTCCTGCTAAGCAAAAGACACCTCCATCGCCTGCTAAGCCTAAACAAAAAACAAAAAAGAACCCTTATAGTGATCTCAAGGATCCGGCTACCAGTTATACGCTACCAACAATCAATGCAAGGGAGAGAAGTAGGGTAGCAACTTCAATGCAGAGAAGACTATCAATTCATAATACAAATTATGCTCCACCTACACTAGATTACTCAATGCCCCTACCTGATATGCCAAACATGATAGTTCCCAATGATAATGTGGATAGTAGTCATAATAATAGTAGTTTCACCACTGAGAACGAATCGGTAAGCTCTAAAGGCCCTTCCAACAGTTTAAATCTTTCAACTGCCGATCTCTCCCTGA
EXO84	YBR102C.line.6.chrII.445062.447323_tile_7	YBR102C.line.6.chrII.445062.447323_tile_7	Saccharomyces cerevisiae	R64-2-1	chrII	447246	447646	+	CTTTACATGCTTCCAATTGTTTCTGGCCTTCTTCAAAGAAAACTCAACCATTTTCACAGTACAAATATTTCAACTTTCAGTCTCTTACCTGGTCTAATATGAAGGCTTTTTGTTCATTCGGCTTTGCTCAAGGTCTTACAAATATACTATTAACTGCAGTCTCTAGTCTCTTTTTCCAGTCATCTATTTTCATGGAGCGGAACTTAGCAAACGAGAAATAAACAAAAATGATTAGGAATGTATTCATGTTGAAAAGGTTATGAGATATGCAAGACCATTCGTTTTGATTTGCAATTAGTGAGAACAATTTAAACACCTTGGTGCGAAATTGAAGGTTTTTTTTTCCA
MUD1	YBR119W.line.7.chrII.479338.480323_tile_1	YBR119W.line.7.chrII.479338.480323_tile_1	Saccharomyces cerevisiae	R64-2-1	chrII	479310	479716	+	CATGTCAGCGTATGTATATACCTTGTAATTTACGTTTCCTTAAATCTTCTTTCTACTAACGTTTTCATTATTCTATACTCTATGACCAATAAAAACAGACTGTACTTTCAAAATTTACCCAGTAGGCCAGCAAATAAAGAAAATTATACCAGATTACTTCTGAAACACATTAATCCCAACAACAAGTATGCCATTAATCCGTCGCTACCCCTTCCCCACAATAAATTACAAATATCATCACAACCGCTGATGTTACTAGATGATCAAATGGGCCTTCTTGAAGTTTCTATTTCAAGATCATCAAAGATGACTAACCAAGCATTTTTAACGTTTGTCACTCAAGAAGAAGCAGA
MUD1	YBR119W.line.7.chrII.479338.480323_tile_2	YBR119W.line.7.chrII.479338.480323_tile_2	Saccharomyces cerevisiae	R64-2-1	chrII	479662	480110	-	ATTGGACACTTTAGCCCGCTTAAGAGGTTTCTGCGATTGTTTTAGATTTTCTTGCTGAGACTTCATGTTTTCCAATCTACGGGTTTCAAATTCTTTTACAATCCTATCAATCTCAGCCTCCTCTACCTTTCTTGATCTCAGCTTATGCTTCAGGCGTCTTATTTGCCTTTTAAGCCTGAACTTTTTGGCGCATATATCATCACTACGTAACTTGCGTTTAAGTTTCCTTGCTTTAAGCACCTTCTTTATATCAAGGTTGTACGTTTCGTCATTACCTTTTTTTTTTTGCATTTCTATTGAAAGACCCAATAACGAATTTGTTCGAGCCTTTCCCATTCTCACTTTACGACCTTGAACTTTTAATGCTGTTGTCGTGTATTTTTCTAGAAACCGGT
MUD1	YBR119W.line.7.chrII.479338.480323_tile_3	YBR119W.line.7.chrII.479338.480323_tile_3	Saccharomyces cerevisiae	R64-2-1	chrII	480056	480498	+	TACAATGGAAAATCCACCGAACAAAGTCCTTCTTATACAAAATTTGCCAAGCGGCACTACCGAGCAATTATTGTCGCAAATACTTGGCAATGAGGCTTTAGTTGAAATCAGATTAGTTAGCGTTCGTAACCTAGCTTTCGTGGAATACGAGACCGTTGCTGATGCTACGAAAATCAAGAATCAGTTAGGCTCCACTTACAAGCTACAAAACAATGACGTTACCATAGGATTTGCTAAGTAGAATTTCCTTTGCGGAAGTATACCTCGAGTAAAGAAATTCACAGATAAATTTGAATAACGTTCTCCATTATGAATAAATATGTATTTACAAGCTTAGAAAATAATGTGCTCTTTATTTACCAAATAATACAGTTCTCATTGCAGTAAAT
SPP381	YBR152W.line.8.chrII.546376.547251_tile_1	YBR152W.line.8.chrII.546376.547251_tile_1	Saccharomyces cerevisiae	R64-2-1	chrII	546320	546747	+	TTTTTTGGTTACTGATTTGAATCACATACGATGAGTTTTAGACATTTCAAGAGGAGACTTGACACAAGCTCAGCAGATGAAAGCTCTTCGGCGGATGAAGAGCATCCAGACCAAAACGTATCTCTAACAGAAAAATCAGCCTCATTAAGCCATAGTGATTTGGGCGGCGAAATTTTAAATGGTACAGGAAAGAACCGCACCCCCAATGATGGCCAAGAATCAAATGAAAGTGATGGGAGTCCCGAAAGTGATGAGAGTCCCGAAAGTGAAGAAAGTAGCGACAACAGTGATTCGAGCGATAGTGACGATATGAGACCTTTACCGAGGCCATTATTTATGAAGAAAAAGGCCAATAATTTGCAGAAAGCTACCAAGA
SPP381	YBR152W.line.8.chrII.546376.547251_tile_2	YBR152W.line.8.chrII.546376.547251_tile_2	Saccharomyces cerevisiae	R64-2-1	chrII	546694	547100	-	TCGTATTTGGTATTCCCATCTTTGCCTTTTTGCATCGCTTCAAATCGTTTTGCCTCATATTCTTCTGATTCTCTTTGTTTCGCAAGTTGTATTCTTCTATGCTTTTGCTTTCGTTCGTTCTGCCTTTCAAACCATTTCTGTCTCTCCTTTTCTGAATCGACTTCATCGTTATCATCTAAGAGCAAGCACTGCTTGATCAATTCTTCGTTGGTGCTGTAATTGGTGTTAAGTCTCAGCTTCATCGTTTCGTAGTTCTTTGCCACTTGATTAGCTTTGTCGATGTTTTTTATCATATTTTCCTTCTTTGTTTGCAGAACTCGTGCGTCATCTTGGGCATTCCAGGGTTGATCTAT
SPP381	YBR152W.line.8.chrII.546376.547251_tile_3	YBR152W.line.8.chrII.546376.547251_tile_3	Saccharomyces cerevisiae	R64-2-1	chrII	547046	547482	+	ACGTTATCTTGGACAAGGAGAAAGAGAAACTTGATCACAAAAAACAAAGATCGGCTGAAAAAGTAGAAAAATCTCACAATAACAACCGTTACAAGATTACAAGAACTAAAAATGTTGAATTTGGTGACCTAGGCAAGAATAGTAGAGATTACGAAGAAACTGAATATTCGGTTATATAACACCGCATCACACACACAAACCCACATGCCTTTCAGTTAGTTGATGTCGGGAAAATCCCGAAACAGAAAAAAGAGGCAAAGATGAAGATATCAAATTTTTTCGCAGAACCATTACATCTGGCTTTGGATACGATGAAACAATCTAGCAGAAATACAGTACCAACCTATTGGTAGCTTCTTTGTATTACTATCAACATTTTTAGA
NTC20	YBR188C.line.9.chrII.603685.604107_tile_1	YBR188C.line.9.chrII.603685.604107_tile_1	Saccharomyces cerevisiae	R64-2-1	chrII	603657	604105	+	GATCAGCCGCTATCATCATTGTCACGGTCGGGTTCCTGTAATACCCTTTTCCTTATTATTCCCTTAATTTTTTCATTCGTTTTCTTCTCGAGCACTTCCATAATAGGCGCTAATTTGGCTTTGAGATCGCTGGTTTCGCAAACCTTATCGATGTAACGCTGATGTTCGTTTTTTTGGGGGATAATATATGGCTGACCACTCTCTTTTTGTTTCGTCTTCTGAATAGTTTCTTGTACAAAACTATTCGTTGCGTTAGAGCTCTGTCCTGTTTGAATCACCGTGTCATATACAGGTTCATTTGAAATATTTAAACCAACAAAATCATTGGCTTCTTCTTTGCCTGTTTTGCCCAGCTGGTTGATACGGGCACGTAACTGATTTAATTCTTGGTCCCTT
NTC20	YBR188C.line.9.chrII.603685.604107_tile_2	YBR188C.line.9.chrII.603685.604107_tile_2	Saccharomyces cerevisiae	R64-2-1	chrII	604051	604493	-	TATGCAAATGAACAATTTTATTAAGTAAACTTCATGAAATTTATGCATAATGCTTAATGGGATTGAATGTTAAGCTACATGAGTGAAGCGCGTCCACCTGAAGCCGCCAACTTTATGATTTTTTCAAGTAACCTTTGTTTTGCGAATATGAAAAATGTACAGATGTGTAAATGTACGGATTAAATCGTCGCAGCGGGGAACACCGCTTTCTGAAATTGAAAGTTTCCATACTAGAAGGTCAAGATGCTGTCAATTAGGCTAGGAATGATACAGAAAAGCTGGCTAGCCGTTCCTTCAAAGCCTTCCATTACATCTACTTTTTTACGACTTACTTGTTGCGACTACTTTTTACAACCAGTATGCCCTCTCTGCGAGATTTATCACTAGAA
U2	LSR1.line.10.chrII.680688.681862_tile_1	LSR1.line.10.chrII.680688.681862_tile_1	Saccharomyces cerevisiae	R64-2-1	chrII	680644	681060	+	AAAAAATAAAAAAATAAAAGAGCGAACGGGAAGACGAGAGAAACATCAAGCGACCAAAGTAAAAGTCAAGAACGACTCCACAAGTGCGAGGGTCGCGACGTCTCTAACTTTAAAAACAGGCGTCAACCATCAAGTCCGTTTCTTGATGCCGCCGGCATTCTTCAAATCCCTCCAAAAAAAACGCCTCTATGACATAGGCGGTTAATAAAACTGGCCTTGAAACAACAGATGCAGTCATGGCTCTTCTCTTTTCCCAGCAAACGCCTTCCATTGCCTCCTTTTTTTCTCTTCCAGAACTCTCTCAGCAGTATTCTCACAAACACATCTCCTCCCCTTTAGCAAACCTCCATTTATATCCTGCGA
U2	LSR1.line.10.chrII.680688.681862_tile_2	LSR1.line.10.chrII.680688.681862_tile_2	Saccharomyces cerevisiae	R64-2-1	chrII	681006	681451	-	AAGAAATGGTGCTATAGTAGGTTGGGAGATAATATTTATGGTATGGGGTGCTAGTGCGGATGGGGCGCTCTTATTGTTGATTTCTTCGCTCGTCTTCTTTTTCTGGTGGCGCTGCAAGAGGAAGTTTTTCGACTTTGTTATGATTTTTGGTTTGCAAGGAAAGGTGTCTTACGATTCTTTTTTTGATGTAATAGGATAAGCTTGCTTATCCCCCAAGTATCGGCCAAAGTTGTTGATTTTCCTTTTGAAGTGTCCTCGGTTTGAGGGGGTGTAGGGTGGGGTTGGTCTACAATAAGAGTGTTCCATTGTTAACGTGCTGGCGTCTTTTACTATATTTTTTTTCCCAGTTTATTTTGTGCTTATTTTCTCATTGAGGAGAAGGAGCTCTTCT
U2	LSR1.line.10.chrII.680688.681862_tile_3	LSR1.line.10.chrII.680688.681862_tile_3	Saccharomyces cerevisiae	R64-2-1	chrII	681396	681822	+	TCCCATCGATAAAGAAAAACCAAATCCCGCGTTGGACATAAACGGCTCGGAAAGACAGGGAAGAGTATGAAGCAAAAAGCCAAACTAAGGGAGAAACAGAAAGCTAAAAAAAAGAAAATAGAAAACAACCAGAAGAAAACAAAAACAATAACCTTGAGCAACCGTCGTCTCAAAAACCAATTTCGAAAAACCATCATAAAAACGCCTTATGAAGAAACCATGAGCGAAGAAAAATAGCAGCAAAAAGTAGTGAGACCTGACATTAGCGGAAAACAACTTGCTTAAAAAGTCTCTTCCCGTCCATTTTATTATTTTGGGTGCCAAAAAATGTGTATTGTAACAAATTAAAAGGTAATGAGCCTCATTGAGGTCA
U2	LSR1.line.10.chrII.680688.681862_tile_4	LSR1.line.10.chrII.680688.681862_tile_4	Saccharomyces cerevisiae	R64-2-1	chrII	681768	682200	-	TATTACATGTATTAAATAACATGCTTTTCTGCTCAAATTTTTTTAACCGCCGAGGCCTGCACACTTTCACTACGTGTATAACGATGCTGCAGACAAAGTAATGGGGTGTATGGGTGTGGGTGGCAAAAAAAACCTAGCAACGCTCTATGTTTCTTTTCTTTTTTCTTTCTTTTTTTTTTTTTGCCGTTTCCGATGGGCCACTCGGTGAAAACATATAAAAAGGGCTCTACATTCATTTTTTCATCGATGAGTACTTTACTTGTTATCAGATTTATTCATTTTGTTTCTACTTGTTTTTTTTTTAAATCCCCACGAATCTCTTTGCCTTTTGGCTTAGATCAAGTGTAGTATCTGTTCTTTTCAGTGTAACAACTGAAAT
PRP5	YBR237W.line.11.chrII.691969.694518_tile_1	YBR237W.line.11.chrII.691969.694518_tile_1	Saccharomyces cerevisiae	R64-2-1	chrII	691941	692369	+	GTATGGAAACTATTGATTCGAAGCAAAATATTAATAGGGAGTCTTTATTGGAGGAAAGGAGGAAAAAACTAGCAAAATGGAAACAAAAAAAAGCACAATTTGATGCTCAGAAAGAGCATCAAACTTCACGCAATGACATTGTTACTAACAGTTTAGAAGGTAAGCAGACTACTGAAAAGTTTACGGAAAGACAGGAACGTGTAAAAGAAGAGCTTCGGAAGAGAAAAAATGAATTTAGGAAATCTGACGAACCTGTATCGGTTAAGCCTTCGAAGAAAAAGTCGAAGAGAAGTAAGGTAAAGAAGAAAATATCCTTCGACTTCAGTGATGACGATGATTCTGAAATAGGAGTTTCTTTTAGATCGAAGGAGCACAT
PRP5	YBR237W.line.11.chrII.691969.694518_tile_2	YBR237W.line.11.chrII.691969.694518_tile_2	Saccharomyces cerevisiae	R64-2-1	chrII	692315	692720	-	TATCCAGACTAAGTCTAAGCTCCTCAACTTCCATCTCTGACATCGAGGAAACTGTTTCAGATTCTATATAAAAATTTTTTTGGAACGGCTCAAGCTCTTCTGGAGAGTAATAAATTTGCTTTACACGTTTTTTTGCTTTGAGTTTAGCAATTTTCGCTATATTAGAATTATCCGTATTATCTTCAACATCCTCATCGTCGGTTCCTCCAAGTTCAAACAATTGATCCTCTACATCAAGAATGTCGCCTCTGTCGTACATGCCTTTACTATTACTCATTTTCTCCTCCTTCAATGACGTCATAAACTCATCCAGTGGATCTTTTTCATTATCATGCTCTGGAGCTTTTTGAA
PRP5	YBR237W.line.11.chrII.691969.694518_tile_3	YBR237W.line.11.chrII.691969.694518_tile_3	Saccharomyces cerevisiae	R64-2-1	chrII	692665	693082	+	AATATCAAAATAAAGGGAACAGGTTGCCCCAAACCAGTCACAAAGTGGTCTCAACTGGGACTATCAACGGACACCATGGTTTTAATTACAGAAAAGTTGCACTTTGGCTCCTTAACGCCTATTCAATCCCAGGCTCTTCCCGCTATTATGTCAGGTCGTGATGTTATAGGAATATCAAAAACTGGCTCCGGCAAGACCATCTCCTATCTTTTACCATTGCTAAGACAAGTAAAAGCTCAACGGCCATTATCAAAACATGAAACAGGGCCCATGGGTTTAATTCTGGCTCCAACTAGAGAGCTAGCTTTACAAATACATGAAGAAGTTACTAAATTCACAGAAGCAGATACATCCATTAGATCAGT
PRP5	YBR237W.line.11.chrII.691969.694518_tile_4	YBR237W.line.11.chrII.691969.694518_tile_4	Saccharomyces cerevisiae	R64-2-1	chrII	693029	693465	-	ATCTTCTGAATGGCATATTCTAAACTTTTGTTTTACGTTTTCATTAACCATTCCCTTTGAATTAATCGTAATAGATATTGGGGAATGCAAAACTCTTACGGCAAAACTGCGTAGTTTGTTCGGAAAAGTTGCACTAAATAGAACACACTGTTTATCCGGTCGAACAGTTTTCATGATTTGCGTTATTTGAGGTTCAAAACCTAAATCGAACAGCCTGTCTGCCTCATCCATTACTACGAACGTTATTCTTTTAGTACTAAGTAATTTCCCATCATTTAGTGTTAATATATCAATAAATCGTCCCGGTGTGGCAACAACAATCTCAGTGCCTCTTTTAAGATCAGTAATCTGCTTTTTCATTTCAGAACCTCCTGTACAGCATA
PRP5	YBR237W.line.11.chrII.691969.694518_tile_5	YBR237W.line.11.chrII.691969.694518_tile_5	Saccharomyces cerevisiae	R64-2-1	chrII	693409	693827	+	TGAAAAATTTGACAATCTGGTGCAGCTTATCCATGAGCGCAGTGAATTTTTTGACGAGGTTCAAAGTGAAAATGACGGACAGTCAAGCGATGTTGAAGAAGTTGATGCTAAAGCCATTATATTTGTATCAAGTCAGAATATTTGCGACTTCATTTCAAAAAAGCTGTTAAATGCTGGAATTGTGACCTGTGCTATTCATGCAGGTAAGCCATATCAAGAAAGGCTTATGAACTTAGAAAAGTTCAAACGAGAAAAGAACAGTATTCTTCTCTGTACAGAGGTTCTCTCAAGAGGTTTAAATGTTCCCGAAGTGTCGTTGGTTATTATCTATAACGCCGTCAAAACTTTCGCGCAATATGTTCA
PRP5	YBR237W.line.11.chrII.691969.694518_tile_6	YBR237W.line.11.chrII.691969.694518_tile_6	Saccharomyces cerevisiae	R64-2-1	chrII	693773	694217	-	TCATAATTGAGTCTCGGAATAAGCGCAGAAGACTCAGACACACTGTCATGCCCTTCGCGTGGATTGCTGATTTTCTTTTCCAAGTCATCGCTCCTCTTATCATTCTTTTTGAGCTCCAAATCTTTATTTTGAGCTTCCTCTCTTTTACTTTTGATATTTTCCAGTCCTTTGCCGCCGAACCCTTTCGACAACCTAAACTTACCCTTTTTCATACCGGATTCAAACTTGGCACTCATTTCCTGAAGTTCTTTTGCTTGCAGAGGGTCTAAAGCTTTTATTTCTTCATCGCGCATTGCCTTGCTCAAGATATAAGCACCTGACAGTTCATCATGCAATAGAAGAGTAATAGCAGTACCGGAGCGACTACCTCTGGCAGTTCTTCCAGTAGTAT
PRP5	YBR237W.line.11.chrII.691969.694518_tile_7	YBR237W.line.11.chrII.691969.694518_tile_7	Saccharomyces cerevisiae	R64-2-1	chrII	694163	694563	+	AACTATTCAAAGAGTCTACAGACGGGTCGATCATCTTTTACGCCAAGGTTTATATTAATGATTTACCCCAGATTGTAAGATGGGAGGCTACAAAGAATACAACCTTATTATTTATCAAGCATGAAACCGGATGTAGTATTACTAACAAGGGTAAATTTTACCCTGAAGGGAAGGAACCAAAGAATGAAAACGATGAGCCTAAACTATACTTATTGATCGAAGGCCAAGATGAGAAAGACATACAATTAAGTATAGAATTGCTGGAGCAAAAAGTTAAAGAGGGGGTCGTAAAGGCTGCAAGCTTGTCTTTGAAGAGTACTAAATACTAGTTTTTAGAATTTAACTCA
BUD31	YCR063W.line.12.chrIII.228318.228791_tile_1	YCR063W.line.12.chrIII.228318.228791_tile_1	Saccharomyces cerevisiae	R64-2-1	chrIII	228290	228710	+	ACATGCCGCGCATAAAGACCAGAAGATCCAAGCCTGCACCTGACGGGTTCGAAAAAATCAAGCCAACCCTCACAGATTTCGAAATCCAACTCAGAGATGCCCAAAAGGACAAGTCGTCTAAGCTCGCAGCAAAGTCCAATGAGCAGCTCTGGGAGATAATGCAACTCCACCACCAGCGCTCTAGATACATATATACTCTGTACTACAAGAGAAAGGCCATCTCCAAAGACCTTTACGATTGGTTGATAAAGGAAAAGTATGCTGATAAATTGCTAATTGCCAAATGGCGCAAAACCGGGTATGAAAAACTGTGCTGTCTGCGCTGCATTCAAAAGAACGAAACTAACAACGGTAGCACTTGCATCTGC
BUD31	YCR063W.line.12.chrIII.228318.228791_tile_2	YCR063W.line.12.chrIII.228318.228791_tile_2	Saccharomyces cerevisiae	R64-2-1	chrIII	228656	229090	-	TTTTGATTTTAAATGAGGACGCGTTTTAGTCAGTGTTTCAGATCCTTATTACATCCACAGGTTTTAACGCGTTATCTTTGTTCCGAAAAAAAAAAAAAACGGAAAAATATATTTTTTCGCGTCGCGTTCTCGCGTCTGTTTTGTTTTTTCGCGTTCCAATGACCAAAATGGGAAAGTGGTCGTCTTTGACGAAGGAGACGAAAACCTCTTCTAAAACGTTGGGAGAGAGATAATTACATGGCCAGAACAATACTGCAACGTGCATATAGTCGTTAGTCTGTGCTTGCACATCCACGGCAGCCGCAGTGGACGCACTGATGGAAGGACACCTGTGTGCCCTTTTTGCGTGCTTCTTCCTCTAACTGTGCACGAGGCACCCTG
CWC2	YDL209C.line.13.chrIV.86207.87226_tile_1	YDL209C.line.13.chrIV.86207.87226_tile_1	Saccharomyces cerevisiae	R64-2-1	chrIV	86177	86609	+	TCTAATCCTCATCAGAGGAGAGGTAATCGAGCAAGGGACCACCAAGCTTACCAACAGATGGCTTTGATGAAATATTTTCTCTACTGATATTTTTTTTCACTTTCTTCAATTTTTCTATAAAATCATCACTCTCCATTCCATTATCTAATGGCAATAGTCTTTTCTTGACATTATCAACACTTGCTTCTGGAAATGTCCTGTCTAACCTTTCATTATTCTTATTATTAACCTCAGTGCCAGCACTATTGGTATTGTTATTGATTAGATGCACCATCATGTTTAAAGACTCTAACTTCAGTTCTTCTTGCAGTCTTTTCTGTGCAGCGGGGTCTGGATCTTCATTTGCCCATTTCACCAATAGTCCAGTACCCTCCCTT
CWC2	YDL209C.line.13.chrIV.86207.87226_tile_2	YDL209C.line.13.chrIV.86207.87226_tile_2	Saccharomyces cerevisiae	R64-2-1	chrIV	86555	86987	-	TCTGCATCATATACCAGACGAAGAAGATATAGGTAAACTGGCCCTGAGGACAGAGGTATTGGACTGTTTTGGTAGAGAAAAATTTGCTGACTATAGAGAGGATATGGGCGGGATCGGTTCATTTAGGAAGAAAAACAAGACATTGTATGTAGGTGGTATTGATGGAGCATTGAATAGCAAGCATTTGAAGCCAGCTCAGATAGAAAGCAGAATTCGATTTGTATTTTCTCGATTGGGTGATATTGATAGAATACGATACGTTGAGAGCAAAAACTGTGGATTTGTGAAGTTTAAATATCAAGCTAATGCAGAATTTGCCAAAGAAGCCATGAGCAATCAGACATTGCTGCTACCCAGCGATAAAGAATGGGATGATAGA
CWC2	YDL209C.line.13.chrIV.86207.87226_tile_3	YDL209C.line.13.chrIV.86207.87226_tile_3	Saccharomyces cerevisiae	R64-2-1	chrIV	86933	87369	+	ATATTCACATTTAGGGCCAAGGCAACACATACCCTTTGCAAAAAATAGACAGAAGAACAACTGGCCATCATTATCGCCCCTAGTCTTCCCAGAATGAAGTTGCGGCTGCAAAGCAAATGGACTAACAAATCGTGTATTCCCCGCAAACCCTTGGGACCATTTATTATACCATATATTAAACGTCAATCCAGTCTGCGCCGGTATAGAGGAGGGCAGTTCTGACTCCTTCACTTGCACTTTCGCGGATTTATCCCTCCAAGATGTCATCCAAATTTCTATCAATGCGTATACTGTCTTACTAACGTCGTTACTACCTTAAGGCCCATCGCCAGTAGTCTTTATTATGATCCAGCCTTCAATACATAATGGAAAATTTCATCATT
SNU23	YDL098C.line.14.chrIV.284581.285165_tile_1	YDL098C.line.14.chrIV.284581.285165_tile_1	Saccharomyces cerevisiae	R64-2-1	chrIV	284549	284979	+	TCTCATTTTTTAGAGGTGGCAAAATTGGAAAATCCCATCATTTGACTGACTTTTGATTCACTCTCAATAGAAGGCTTAGTAGCCACTTTCTTTGCTTTCTCCACATCTGTGTCCAAAAGCCTTTTCCTCTTGGACTGAGTCTCCATAGAACGCACCTCTACAAAATCCTTTATCAAGTTATGATAGCACAACTCAAACTCCTCTTGCGGTACGTCATCATTATCTCTTATATCTATAATTAACGGTTCATCAAACAAATTTTCAAATTTTATTGCATGGACCTTGTGGTTGAGATGATCAATGTATTGTAAAGTGTCTTTGAAGGTTAGGTTACAAATATCGCAGTAAAATCCGAACTTCTTTCCCCTCTTGAA
SNU23	YDL098C.line.14.chrIV.284581.285165_tile_2	YDL098C.line.14.chrIV.284581.285165_tile_2	Saccharomyces cerevisiae	R64-2-1	chrIV	284925	285363	-	AAATAAACTTATAAAATGCAGAAAATACATAAGTATGATTTTTCTTTTTTTTCTCCTAAGAAAGGAAGAAGTTTAATCGAATGCGCCGCTAAATAGAAAACAGTTGATGCGAAAGTTCATCAAAACCAGAAGTTCCTACAAGCCTTAGCTGACAAAAATTCGAGAAAGCTAATGTCGAATTTTGGCAGAAGAACTTGGGATAGAGAGGAGTATGCTGAGCAGGCTAGAAGCGGCTATGACGATCGATCCTTAAAGGCTACGCTAACACCGATTGAATTACAAGCTTTAAAATCCAAATATACAAATTACGATCATTTAATCAAGGGCTCGCTAAAAGACCTAAATAAAAGGAAACTAACAGCAAATACAGAGAGCTTATCGTCTT
LUC7	YDL087C.line.15.chrIV.300214.300999_tile_1	YDL087C.line.15.chrIV.300214.300999_tile_1	Saccharomyces cerevisiae	R64-2-1	chrIV	300170	300574	+	TTTTTTTATGTATGGCCCTACACAAAGCGTCTTCCGGGTAGTGTAGTAGCTGTCTTGCTGGCGTTAGTTGTCCGGTTATTCTTCATTAGCCGATCATAATCCTCTCTCATCTTGACATATCCCAGATGAATCTTCCCCAAGAAGTGGTCAGCAAGCCTTCTGTCTGTATCTAAACGCGATAGGTATGCCCCACACACCTCGCAAACCTGTAACTTTTGCTGGGCGCTCTGGCCCACGTTTTCTGTAATGTTTCGTACACGTTTTGCAACTTCTTTCCTTTTACTAATCAGTTCTTGTAATTTGACTGACTGTAGCATACCCATACTGACTTCATCTGCACGAATTAAAGAA
LUC7	YDL087C.line.15.chrIV.300214.300999_tile_2	YDL087C.line.15.chrIV.300214.300999_tile_2	Saccharomyces cerevisiae	R64-2-1	chrIV	300520	300928	-	AAAAAGAGACCTCGGACTACACGATCCCAAGATCTGCAAGTCATACCTTGTTGGCGAGTGCCCCTACGACCTGTTTCAGGGCACCAAGCAGAGCCTGGGAAAATGCCCGCAGATGCATCTTACCAAGCATAAAATTCAGTACGAGAGAGAGGTCAAGCAGGGCAAAACGTTTCCCGAATTCGAAAGAGAATATCTGGCCATTCTATCTCGGTTTGTTAATGAGTGTAATGGCCAGATATCCGTAGCACTACAAAATCTAAAACACACCGCTGAGGAACGAATGAAGATTCAGCAGGTTACCGAAGAACTAGATGTCTTGGACGTGCGGATAGGCCTAATGGGACAAGAGATTGAT
LUC7	YDL087C.line.15.chrIV.300214.300999_tile_3	YDL087C.line.15.chrIV.300214.300999_tile_3	Saccharomyces cerevisiae	R64-2-1	chrIV	300872	301308	+	TTGATGCGAATACCTGTTGTGGCGGAAACTGAAGTCCCTGCCCATCAGCTGTTCGACGAGTTTGCGTTGTTCTGCGGCAGGCGTTGACATAGTTGACATTCTGACGGTAGTTGGCAGCTTTCTGCTGGGAGTGTAGAGCCTTTTGTAGTATAACTTTTTGTTCTTTTCTTTCTTCTCTAATGCCTGAGGCTTCGGCGGTTATTCGGGTAATACATTAAGGAAGTTGCCATGATGTGGAAGAATACGACTAGTCAGTTAGCGATGGCCAGCTCCTTTACCTAAATCATGTGGCCTATCTTCAGATAGCATACTACCACCAACCATCAATACCTCAATGGCTTTCAACAAGTACCCTTCGTCGGGTTTTCAGCTTTTTTCCTA
SUB2	YDL084W.line.16.chrIV.305237.306577_tile_1	YDL084W.line.16.chrIV.305237.306577_tile_1	Saccharomyces cerevisiae	R64-2-1	chrIV	305129	305577	+	ATTCTCATCGGTATAACTAGCTTATATTCACTTTGGCAATAGGTTAAAAAAAGCTCGTTCATTTTTTTAAAAACAGCAACGATGTCACACGAAGGTGAAGAAGATTTATTGGAGTACTCCGATAACGAACAAGAAATTCAAATTGATGCCTCTAAGGCCGCTGAAGCTGGAGAAACTGGCGCCGCCACTTCTGCAACTGAAGGTGATAATAATAACAACACTGCAGCTGGCGACAAGAAAGGTTCCTATGTTGGTATCCATTCCACCGGTTTCAAAGATTTCTTGCTAAAGCCAGAACTATCAAGAGCCATCATTGACTGTGGTTTTGAACATCCTTCTGAGGTCCAGCAACATACCATTCCTCAGTCAATTCATGGTACCGATGTCTTGTGTCA
SUB2	YDL084W.line.16.chrIV.305237.306577_tile_2	YDL084W.line.16.chrIV.305237.306577_tile_2	Saccharomyces cerevisiae	R64-2-1	chrIV	305523	305971	-	AGCTCTGAAAATTTCTTGCACATCTCTTCTCATGTCTAATTCTTCTAAAACCTTATCACATTCATCTATGACAAAGTTCTTGACGTGTGACAAATCAATGTATTTTTCTCTCACTAACGCTTTTAAACGACCTGGAGTTGCAACAACAATGTGAGGAGCAGTATCTTTATTCTTTAAAAGTTCAGCATCCTTAGAAATTGGAGTACCACCGTAAAAGACTGCTGTCTTAACGTCTGGCATATATTTGGAAAATCTCAAATACTCGTTACGAATTTGATAGGCCAGTTCTCTAGCATTACAAATGACAACAACGGCAACTTCACCTGGAACAGGGTCCAATTGTTGCAGAGTGGATAAGACAAAGACAGCTGTCTTACCTAAACCAGACTTTGCTT
SUB2	YDL084W.line.16.chrIV.305237.306577_tile_3	YDL084W.line.16.chrIV.305237.306577_tile_3	Saccharomyces cerevisiae	R64-2-1	chrIV	305917	306357	+	TACTCCAAGAGACAAACAAGTCATGATGTTTTCAGCCACACTTTCTCAAGAAATTAGACCAATTTGTAGACGCTTCTTACAGAATCCATTGGAAATTTTCGTCGATGATGAAGCTAAGCTAACCTTGCACGGGTTGCAACAATATTATATCAAATTAGAAGAACGTGAAAAGAACCGTAAATTGGCTCAATTATTAGATGATTTGGAGTTCAATCAAGTCATTATTTTCGTTAAATCTACCACAAGAGCTAATGAGTTGACCAAACTATTAAACGCCTCTAACTTTCCGGCTATCACCGTTCATGGTCATATGAAACAAGAAGAACGTATTGCTCGTTACAAGGCTTTCAAAGATTTTGAAAAACGTATTTGCGTGTCCACAGATGT
SUB2	YDL084W.line.16.chrIV.305237.306577_tile_4	YDL084W.line.16.chrIV.305237.306577_tile_4	Saccharomyces cerevisiae	R64-2-1	chrIV	306303	306751	-	CTACACTACGTTCATTTTCCAACAAAAACTCAATCTTTCGCTATAACTGCTAATTTTTTTCCACTTCCCCTTTTTTGTTTGTTTTGTTCGTTTGAATAATACAAAATCTTTATATAATCTATATAAAAACGTATCTTTTTTCCTTTATTAATTATTCAAATAAGTGGACGGATCAATGCCTTCTTCTGGGAATTCAGCGATTTTGACATCGAAACGCTCTTGGATCTTAGCCAAGACTTCCTCATCTTCCTTTGAAGAAACGAATGAAATAGCCAAACCCTTAGTACCAAATCTACCAGCTCTACCGACACGATGTAAATATTGGTCAGCTTCATTAGTCAAATCGTAATTGATGGCTAAATTAATACGTTCAATATCGATACCTCTACCAAAAA
YDL051W	YDL051W.line.17.chrIV.363952.364779_tile_1	YDL051W.line.17.chrIV.363952.364779_tile_1	Saccharomyces cerevisiae	R64-2-1	chrIV	363924	364354	+	AATGTCTGAAAAACCACAACAAGAGGAGCAAGAGAAACCACAATCAAGACGTAATTCATTTGCTGTGATTGAATTTACTCCAGAAGTCTTGGACAGATGTTTAAAGCAAGTGGAATTCTACTTTTCTGAATTCAACTTTCCATATGACAGGTTCTTGCGCACAACAGCGGAAAAAAACGATGGATGGGTCCCCATCAGCACCATCGCCACATTCAACCGTATGAAGAAATATAGACCAGTGGATAAGGTTATCGAAGCACTACGTAGTTCTGAAATTTTGGAAGTATCTGCTGATGGAGAGAACGTCAAGAGACGTGTTCCTTTGGACCTAACTGCTGCCAGAAATGCCAGAATTGAGCAAAACCAACGGACTTTGG
YDL051W	YDL051W.line.17.chrIV.363952.364779_tile_2	YDL051W.line.17.chrIV.363952.364779_tile_2	Saccharomyces cerevisiae	R64-2-1	chrIV	364300	364744	-	TGCCGTTTTTCTTCTTATTTTTGGGGAATTTAGGCAAGTTTTTCTTCTTATGGCCGTTAAAGGATCTTGATCTACCGCTGAAGTTTTTGGACTTCGAGGCCTCTCTCTGTAAATCAAACTGTTTTTTCGTCAAAACACTCAGTTTCTTACCTTCATATGACAAAATTTCGTTGGACTCATCGTCATTGGAATACGATTTCAAAAAAGCTTCACATTCTGGAATTGTCTTAAATTCCACCAAGACCGTACCATTAAATTTCTTGTTTCTGTGATCTCTTCTCAAACGCACTTGGTTGATTTCACCTAATTTTTTGAAAAAGGCTTCCAAGTTCTCCTGCAATTCAGGAATTTGGGAAGCTTCAACGTCCTCATGTGGGAAATTCATTACAGC
YDL051W	YDL051W.line.17.chrIV.363952.364779_tile_3	YDL051W.line.17.chrIV.363952.364779_tile_3	Saccharomyces cerevisiae	R64-2-1	chrIV	364690	365116	+	AAGGAAGAGTCAAAAGAGGACTCTTCTGCCATTGCCGATGACGATGAGGAGCACAAGGAGTGATTCTTGTGTTTCTTCTGGTTCTCGTATCTCATTATCATAGCATATTAAGAATATATGTACTAACATATGTACTAAACAGAAACACAATATGAATTACAACTAATACTATATTATTTGTCTCCTTTTTTTATTAGTATTAAAAATTACCGTTACTGGTTAAAATGGAATACAGCTCATCCATTTAAAAAAAAAAAAAAATAGAATAACAATAATTAAGCAGAAAAAATGTTAACGAATATAATAAATCGATTTGTCCATTTTCATAAATTTTTTTTTTGTATTATTTCATTATCTGTGCCTCAAAGCATTA
PRP11	YDL043C.line.18.chrIV.375680.376480_tile_1	YDL043C.line.18.chrIV.375680.376480_tile_1	Saccharomyces cerevisiae	R64-2-1	chrIV	375648	376086	+	TGTCATACATCGGCTTGTTCTTGTTCGGCTTGTTTAAAGAAAAATTGAACGTAATAAAGTTTTGATATAGCATCCCAAAATGTACACTTTTTATTTAATTCATCTACTCCATCGTTATTATTGTCCATGTCATTGTTTTCGCTGAATAATATTTCGTTTGGAGGTAGCTCAATAGCAATATTTTCAAAGGGTTCATACGCAATAACGAGAAATTTTTTTCCCTTCTGTTTGGTATCTGATAGCTCTAAACCAGATACAATCCTAATGAGAGGAGGGACTTTAGCCTTATCATCGCTATCGACACTATTTTCTTTGACTTCACTGCTATAATTTACCTGGATAGCCAAACCTACTGAACCGTTCTTCGGGTTTTTCACGGTAG
PRP11	YDL043C.line.18.chrIV.375680.376480_tile_2	YDL043C.line.18.chrIV.375680.376480_tile_2	Saccharomyces cerevisiae	R64-2-1	chrIV	376032	376478	-	GAAAGGAGGTGGTGGTATAGCCTCAGAATCTCAGTTTAACTTACAACGAAGGAAAGAAGTCGAATCATTACTTAGTAAAGGCGAAAATGTCCCGTACACTTTCCAAGATGAAAAGGACGATCAAGTAAGGTCCAATCCGTACATTTACAAGAATCATTCCGGTAAACTGGTTTGTAAACTATGTAATACAATGCACATGTCGTGGTCCAGCGTTGAAAGGCATTTGGGTGGTAAAAAACATGGTTTAAATGTGTTAAGGCGTGGTATCAGTATAGAGAAAAGTTCTCTAGGGAGAGAAGGCCAAACAACTCATGATTTCCGACAACAACAAAAGATAATTGAAGCTAAGCAATCTTTAAAGAATAACGGTACGATCCCTGTTTGTAAAATAGC
PRP11	YDL043C.line.18.chrIV.375680.376480_tile_3	YDL043C.line.18.chrIV.375680.376480_tile_3	Saccharomyces cerevisiae	R64-2-1	chrIV	376424	376868	+	CTTTGACCCAACGCCTTCTAAATAGTTCATTTTGAATGTATGGATGCGTTAAATGATTTGAATTTGCTGTTCCACCTGCCCTTCTTACATTAAGCTATTTGTGAGAGCCTTGCGTCTTTAGCAGATTTTTTTTTTTCATTTTTTTAGTGAGATGGGCGGTACATGTAATATTTCACCCGGTACAATGAAAATAGCAGAATGTAAATAATATTTGACTACAATAATTGAAAGGAAAACAAAATTGTTTGCCATACTATGTAAATTGATATTAATTTGGCACTTTTAAATTATTAAATTGCCTTCTACTTAGAGGGTTTTGGGATGTTCATCTGATGTAACGACATACACGCCCTTATCCTTCTCTTGGCATTTAAAGTTCTTGTTCTTCAAA
PRP9	YDL030W.line.19.chrIV.397537.399129_tile_1	YDL030W.line.19.chrIV.397537.399129_tile_1	Saccharomyces cerevisiae	R64-2-1	chrIV	397509	397944	+	AATGAATTTACTTGAAACAAGGAGGTCCTTGTTGGAGGAGATGGAGATTATTGAAAATGCCATAGCAGAAAGAATTCAGCGGAATCCAGAGTTATATTACCACTATATACAAGAATCGAGCAAGGTGTTTCCTGATACTAAACTGCCTAGATCATCGTTGATTGCAGAGAATAAAATATACAAGTTTAAAAAGGTTAAGAGGAAGAGAAAACAGATAATTTTGCAGCAACATGAGATAAATATTTTTCTTCGAGACTACCAAGAGAAACAACAAACTTTTAATAAAATCAATCGTCCAGAAGAGACACAGGAGGATGACAAGGATTTGCCTAATTTCGAAAGAAAACTACAACAGCTAGAGAAGGAACTGAAAAATGAAGA
PRP9	YDL030W.line.19.chrIV.397537.399129_tile_2	YDL030W.line.19.chrIV.397537.399129_tile_2	Saccharomyces cerevisiae	R64-2-1	chrIV	397889	398337	-	ATTTTCAACTGCCGCAGCGTCAAGCAAAGCATAACTTTTGAAGAAAAAAGTTTCTACATATTTGCTCAACTTTAGCAAAAAGGCCATGTATCTATCATTCTTGCGATCCATCGGTGGGGTTAGCAAATATTTCTCGTCGTCCAAAAATAATTCTAGGATGTCGAGAAATTGAAGCAGTGAACAATCGCCCCGTTTAATTACATTCAACCATAAAGAATGAAATTGTTCCAGCTCCATATATTCACCATATTGCTCATCTCTAGTAAATATTTCATTTAAGTCTAGGTCTCGAGCTCTGTCAGACAATATATTTGTGCGCCTCGATGGATCAGAAGAAGATGAGAATAAAGCGTATTTGTCTTTTTTAGAGTTGATATCCAATTCAAAGTTCTCAT
PRP9	YDL030W.line.19.chrIV.397537.399129_tile_3	YDL030W.line.19.chrIV.397537.399129_tile_3	Saccharomyces cerevisiae	R64-2-1	chrIV	398283	398732	+	TCTAATCAAATCTGACTTCGAACATTCATACTGTAGGGGATCTCTTCGGTCCGAGGCAAAAGGTATCTATTGCCCTTTTTGTTCGAGGTGGTTCAAGACATCTTCCGTTTTCGAAAGCCATTTAGTAGGGAAAATTCATAAGAAAAATGAATCTAAAAGAAGAAATTTTGTGTACTCTGAATATAAACTGCATCGGTATTTGAAATATTTAAATGATGAATTTTCTCGAACGAGAAGTTTTGTTGAAAGAAAACTGGCATTTACTGCAAATGAAAGAATGGCAGAAATGGATATCTTAACACAGAAGTATGAAGCACCTGCATATGATTCGACGGAAAAAGAGGGGGCCGAACAAGTGGATGGTGAGCAGAGAGATGGTCAACTGCAAGAAGAGCAC
PRP9	YDL030W.line.19.chrIV.397537.399129_tile_4	YDL030W.line.19.chrIV.397537.399129_tile_4	Saccharomyces cerevisiae	R64-2-1	chrIV	398679	399115	-	TACTCATTACATTTCCTTCTTCGTCTTCTTCTTCTAGTTCTAATTCTGTAGGAACTTTTAGTTGTGAAGGATTAGGCTTTGGGGGAACTGCTGCAATAGATGTCAACTGTGACTGCCCCTGCATATTTTTCCAGAGCTCTTGTGCCTCCTTAATTTTGGTTATGCCCTTGAATACTGAAGAAGGTTCGATACCAAGGCATCGCAAGTGATAAATATGTCTTTCTTCGTTGAAATGTCTTTCAAAAGTGCGTCGCCCATTATAAACTTTATTCGAACAAATTTCGCAGCGATACTCTCTGTCAAGCCCATGCAGTTTGTATAGCCAGTATGGCATAGGCAATCCATCCGGACCCAATGGCATGTCAAACGATTTACCAGAGAGG
PRP9	YDL030W.line.19.chrIV.397537.399129_tile_5	YDL030W.line.19.chrIV.397537.399129_tile_5	Saccharomyces cerevisiae	R64-2-1	chrIV	399061	399507	+	AAGAAGGTCTACGATGAACTTAAGAAGCAAGGTTTGGTGTGAAATCTCTCTGTGATATGTATATTTGTTTGATAGATAGCAGTTGTATGTATTTATACTATTCTTAGTAATGACCTTATTACCCGTCTTGTAGAATTGAAAGGCGAAAAACAATTTGAGGACCCATATAATGGAAGAAAACGGACGTGAAAGTTAAATATACGTACCAGAAGACAAATCACAGTAATAAACTAACAAAACTATATAATAATAATGGACCCACATAATCCAATTGGTATGTTGTTGATATTTTTAGTGTTTGTGGAGGCAATTGAGCTCGGTGCCCCTTTTGGCTTTGCCTCTTTTGCATTTTAGTTCTTTTACCCCTATATTATTAATACTAACCATCTCGAT
SLU7	YDR088C.line.20.chrIV.618497.619645_tile_1	YDR088C.line.20.chrIV.618497.619645_tile_1	Saccharomyces cerevisiae	R64-2-1	chrIV	618463	618909	+	ATAACTTAACCATATAAATCTTTTAAGTGGTTCCGTTGTTCCTCAGATTGCTTTGTACCATCTACTTTCCTAGCTTCCAGATCTCCAATGCTGACAATCTTGGGCTGCTTGGTTTCTTCTTGTTCCCGTTTTTTCTTCAGATATTCATATTTAGTAGGATTGGCGACTAAAACATGTTGTACTTTTTCCTTATCCTCAATTTCATCACGTATACCCATTTCCTTAGCGTGAGATCTAGCAAACTGGTTCAATTCGTTTAATTTTAGGCCTTCACCTGTCAAATGTCTGCGGAACATTTTTGATTTTTCATCAACTGCGCCCAGTGTTTCAGTTTTGTACAATCTTGATTTAGGATCATAATTACTCTCCGTTGAATTTATGTCGTTCAAGT
SLU7	YDR088C.line.20.chrIV.618497.619645_tile_2	YDR088C.line.20.chrIV.618497.619645_tile_2	Saccharomyces cerevisiae	R64-2-1	chrIV	618855	619287	-	GGCATAAGGAGAAAGACTGCATGGAAAAACCTCGTAAGATGCAGAAGCTTGTTCCCGATTTAAATTCACAAAAAAATAATGGCACAGTTTTAGTACGAGCTACTGATGATGACTGGGACTCCAGAAAAGATAGATGGTACGGTTACTCAGGGAAAGAATACAATGAACTGATAAGTAAGTGGGAGCGTGATAAAAGAAATAAAATAAAAGGAAAAGACAAATCCCAAACTGATGAAACACTATGGGATACAGATGAAGAGATAGAACTAATGAAGTTAGAACTTTACAAGGATTCCGTAGGTTCATTGAAGAAAGATGATGCTGATAATTCTCAGTTGTATAGGACATCAACGAGATTGAGAGAAGATAAGGCTGCTTA
SLU7	YDR088C.line.20.chrIV.618497.619645_tile_3	YDR088C.line.20.chrIV.618497.619645_tile_3	Saccharomyces cerevisiae	R64-2-1	chrIV	619233	619681	+	CCTGCTTCCCCACAATTCCTACAAAATGACAGCGAATGAGAATCTCGGACGGACATCTTCTGGGGTCTGATTAGTTTGAACTCATCCTTTATACCCATACCAATTTTTGGTTCTGAATTATTGTCAATATCTAAAGCACCCCCTTTTGCTTTTTGCCTATGATGCACCAAGTAGTCGCTTTTTTCTCCTCCTTCTGCAGTGCTCGTATCATCATTGCCGGGCTTCTTCCCTTCTTGTTCTTTGGGGGTATCCTTATAGTACCATGGTTGATTTCTAATATACCTGGGGATATGAATATTTTCATTTTTTTCTTTTGCTTGTTGTAGTTGCCTTTTATTTCTGTTAATAGTGCTTCGATTTTCGTTGTTTCTGCTGTTATTATTCATTATGTAATC
CWC15	YDR163W.line.21.chrIV.781423.781950_tile_1	YDR163W.line.21.chrIV.781423.781950_tile_1	Saccharomyces cerevisiae	R64-2-1	chrIV	781397	781796	+	CATGACCACATCACACAGACCACAGTTAGAAGCAAGAAGCGGTGCAAAAGCGGCCGCTTATACACCAACAGGCATCGAGCATGCCAGATTACTACCAGGACATACAACATTAAAATACAGGAAATTTAAAGAGGAGGAAAATCTTAGAGCAAACTGTGCGCAAGAAGATAGGAGCAACGATAAATCTTTAGAGGAGGCAGTAATGAACGAAGAGAAACAGGATGTTGTGGGGAGTGGGAACCTCCAAGAAACCCGCAGTGAGAAAGACCAAAAAGACTCGTTGCAAGAGCTGCTGGTTACTCAAAAAAATAAAGTGGAAGATAAAGCAGAGCTTGAAGGAAATGAACAA
CWC15	YDR163W.line.21.chrIV.781423.781950_tile_2	YDR163W.line.21.chrIV.781423.781950_tile_2	Saccharomyces cerevisiae	R64-2-1	chrIV	781743	782179	-	TACTTCTAGTCCCAAAGCAGCAGGTTCTCTCAAGTCAGAACCACCCGAAAAAGAGAAGAAACGTAGCAAATTCTCGAGGTTCTTGAAAAGAAAATCTCACCATGATAAATGATCCCTTAAAGAAGACAGTGATAAAAAAAATCACTTGCTCTTGTCAAAAAAAAAAGATATAAACGTACTATTTATGTATCGTTCCTATGTACTATCTAACATGCTTATGGAGAAATTCTTGATGATATTCAGATTTTGTCATATCGTTAATGTATCCGGACGCTGATTTTTTTGTTGCATGTTCCTTAATATTTGTCTCTTTGGTTACTTTATGGCGTCCAAACGCCGTGCCCTTTCTCCACGATCGCCTAGACGAATTTCCTCCCTTTAAT
PRP42	YDR235W.line.22.chrIV.933504.935138_tile_1	YDR235W.line.22.chrIV.933504.935138_tile_1	Saccharomyces cerevisiae	R64-2-1	chrIV	933476	933915	+	TATGGATAAATATACTGCTTTGATTCACGATGAGAATTTTTCAACTCTTACATTGAATGTCTCGAGATACCCTAAAAGTTTGGCATATTGGGAGAAGTTACTGAACTATATAGTAAAGGCTTCGGCACCAATATGCAAGTCCACTGAGCCTCAATTATTAAAGTTAATACGATGTACTTATTCTTCTATGCTGAATGAGTTTCCCTATCTAGAAAACTACTATATCGACTTCGCGCTACTGGAATACAAACTAGGGAATGTTTCTATGTCTCATAAGATATTTCAGCGCGGATTGCAAGCCTTTAACCAAAGATCTTTACTATTATGGACTTCATATTTAAAGTTTTGTAATAACGTTATCTCACACCAGAAGCAGTTGTTTA
PRP42	YDR235W.line.22.chrIV.933504.935138_tile_2	YDR235W.line.22.chrIV.933504.935138_tile_2	Saccharomyces cerevisiae	R64-2-1	chrIV	933856	934256	-	TGTACATTTCCTTCGTTATTTTCTTCAACTTTTTCTTTGCATCCTGCAGGTACGGTCCCTTTCTTCCACTGTAATTGATGTCTATCTTGAGTTTCTTCAATAATTCATCTTTACTTGTTAGTTGTGATAATTGCTTTAGGTCCATTATATCGTCTATGCGCTGTAACCATAATGCATAAAATTTCGAAAAAGAGTGTAAAGGAATTTCGAGTATCTTCCTCAAAACGTTCCAATATTTCTTAGAAGACGTACATCTTGAGCTAATTTGTTCCAGGTATAAATCCCAGAATTCCCCACTGAAAAAATGCAAACCAACATATTCTTCAGCTGTTTCATATTTTTTAAA
PRP42	YDR235W.line.22.chrIV.933504.935138_tile_3	YDR235W.line.22.chrIV.933504.935138_tile_3	Saccharomyces cerevisiae	R64-2-1	chrIV	934198	934638	+	ATGGTTGTACAATATCAAGTACTTGAAATCTATTCCATTTTTGAATCAAAAATTTATATCAACTATTATACATCGCCAGAAACCTTGGTTTCTTCAGATGAAATAGAAACATGGATAAAATACTTGGATTATACCATCACCTTACAAACAGATTCTTTAACACATTTAAATTTTCAAAGAGCTTTACTTCCTCTGGCCCATTATGATCTTGTATGGATAAAATACAGTAAATGGTTGATAAATTCAAAAAATGACCTTTTGGGGGCAAAAAACGTTCTATTAATGGGTCTTAAATTTTCTTTGAAGAAGACCGAAATAATAAAACTACTGTATTCAGTTATTTGCAAGTTAAATGAGTACGTACTTTTGCGAAATCTATTGGAAA
PRP42	YDR235W.line.22.chrIV.933504.935138_tile_4	YDR235W.line.22.chrIV.933504.935138_tile_4	Saccharomyces cerevisiae	R64-2-1	chrIV	934584	935028	-	ATTGCCTCTTGTCCAAATATGACCTAGAAGTGTCGAAATAAATTAAACGGCAATAACAGTTCCAGAACATACCGTTCTGTAGGTAGTACTCCCAACCAAATTCTATTATCTTTTGAAATATGTTCTTTTCTACAAATTCTACGGTATCCTTCGAATAAAACTGTACTAAGTTATTCAATAAAATTTCTTGACCACTTTTTTTTTCTTTACAACTCAAACGTTTCCATACTTTATCAAACAGCTCCTTATTCAAAAGCCCGTTTGATTGTGAATCAGAATATCGACTGGAATACAGAGAATTCTGGCAGAACGTTTTGAACTGAAGATAGTCCCAAAATATCTCAAAATCATCAACGTTTTCAACATTGTCGGAATATGAGGACTCAATTTT
PRP42	YDR235W.line.22.chrIV.933504.935138_tile_5	YDR235W.line.22.chrIV.933504.935138_tile_5	Saccharomyces cerevisiae	R64-2-1	chrIV	934974	935390	+	TATATTGTCAGAAAAATATGGCCCCAAATAGACAAAAAATTTGCACAGAGCGTCTTGCCGTCTTTAACAGAATTCTGTGAGTCATACTTCCCAGAGGAGATGGATACATTAGAGGAAATGTTTACTGAAGAACCTTAGCCAAAAGGCATTGTCATTTATTAAAAGGTATAAATATGTAAATGTATACTTAATGACCGTTAAGAAAAACTACTAGCCTCATCACTCCCGCAGATCTCTATAATTGTTGTTTGAATACTTGATACGGTGGAGTGGCAAGGACAGTCTGCGCAGTCCTAATATCGATATTGATGTCTTCGATCAGAGCTTCCTTAGTAGTGTAGTTCAATTCGGGTCTGATATGAC
SNU56	YDR240C.line.23.chrIV.943674.945152_tile_1	YDR240C.line.23.chrIV.943674.945152_tile_1	Saccharomyces cerevisiae	R64-2-1	chrIV	943642	944082	+	ACTCAATGTTCTAATATATTCAATATCAGCTCTAATGCTTTGACTATATATTCACCGACTCCACCAATACTAATAACGCGGATGGTACTTGGGTGAGGCGCCTGAGCAAAAATAGTGTAATTTGTTGTATTTAAAGATTCAAGCCACATTTGTGACTCGTGAAGATTATTCAGATTCAATACGACGATATTACAATTTGTCTTTGATCGTAGATCATTTAGATTTTGATAAACAATATCAATATAATTTTGTCTTGGACACCTAACGTATGTCTTTAGAATCTGATACGAAGACTTCTTTTTCACTGCATCCATAGAAGCTTTTATGGTACCAATGCAATGTTGTTTGATTTCATCCTGCGTCATAAAACCCGGTTTATTACCT
SNU56	YDR240C.line.23.chrIV.943674.945152_tile_2	YDR240C.line.23.chrIV.943674.945152_tile_2	Saccharomyces cerevisiae	R64-2-1	chrIV	944028	944434	-	CCCTCTACGAACTTCCATTAATTGGCGATGGCTTGTTTGATATAAAGTCGTACATTAGTAAAACCAGGCCAATTATAGAAACATCAAAAGCTCAAATGATTAAACATATTTCTGAAATGAAGGCATATAACGAAATAAGTGGCCTTCAAGGAGATCAATTTCCACGACAACAAAGACCTTTATCGAATTCGCCCTCTTCAAATTCAATTTCCTCTTCTCAAACTATTGAAGCAGGTGCAACTTCATATCAAACACAACCACAGAGACACGCTGTTAATAAGCCATCAAATGTATTGAATTCTTCCAATCGTCATTCCGGGCCAAAAACTTTTGAGGACGGAAGGTATAGTGAA
SNU56	YDR240C.line.23.chrIV.943674.945152_tile_3	YDR240C.line.23.chrIV.943674.945152_tile_3	Saccharomyces cerevisiae	R64-2-1	chrIV	944380	944784	+	GCAAGTGATATCTGTGAATAAGTGCGGTTATATTCACGCTTAAAGTAGTTTATCACGTTAGCTTCACACTTGCCAAATTCTACTTGTGAAAAAAAATTAGAAAGCTCATTCATGAACTTACTTACATGACAAGCCTTAACTTGAAACTGTTGAAAATCTGGAACAACATTGAAACCAACTTCTACAATACTGGATGAGGGCTGCTCTCTTCTATAGCTTGTTATTATATGGCCTCTACCAGTTTCTATATTCTTGGGCAAATAAAACGAACCTGTCAAGTTAATATTCTTAGGAACTCTAAAGTATGATTTTTCGGATGGTGCCATCCATAATCGCTTCTGGAAAGCAAGC
SNU56	YDR240C.line.23.chrIV.943674.945152_tile_4	YDR240C.line.23.chrIV.943674.945152_tile_4	Saccharomyces cerevisiae	R64-2-1	chrIV	944730	945134	-	AAGGGACAACTTTCACAAGGACATTATCCTACGACATCCAATGATGGCCAAAGAAGGAAGGTCGGTAATTCTGAAGCATTCCAATCTTTTGATATATGGAAAAACCTAGATAGGATAAGGTCGACTAAGAAGAATGCAGGGCAATTCATAAAAGGTAGTCTGCTCATACTCCCCATGAGAACGGAAGATAAACAACAGTTCGACGAGTGCATGGATGAATTGCATAAGTATATATCGAAGGATATATTACGATGTTATCCACAGAAAGAGCAGAAAGATGAAGGCATGCTTTTCTACATAGTTTTGAAGGACTTCAATATATTGGACTCTTGCTTCGTATTATCAGTTCTG
SNU56	YDR240C.line.23.chrIV.943674.945152_tile_5	YDR240C.line.23.chrIV.943674.945152_tile_5	Saccharomyces cerevisiae	R64-2-1	chrIV	945080	945486	+	TCGGCTTGGTATGATGATACGCTAATCCTCTCCTTCTTGGGCGCATGATACTAATATTTTTTGCTTATATTAGTCGAAGGGAAACTGTTTCTCAACGTCAAACTTCTACTATAGTATATAATATAACTTTAATGTTTTCTACACTGCGATGCGCGCTGAAAATTCTAGCTCAAATAAAAAAAAGGTTACAACAAACCAGTAGCAATCATGAGAATAAGAAATATGAAGAAGTAATTAAAGATCATGTTGGAGTAAAAATCCAAAATATCATCTGTTTATTAGCATTCGTGTTAGTAGTATATTATCAAATGCGGTGTAAGAAGATGACATAAAGATTGAAAGACAGTCATCAA
PRP28	YDR243C.line.24.chrIV.948518.950284_tile_1	YDR243C.line.24.chrIV.948518.950284_tile_1	Saccharomyces cerevisiae	R64-2-1	chrIV	948468	948908	+	AAAAGAAAGAAAATAATATAACTTTAATATATAATCTCATTACTGAGCTGTTTGCCGACGTTATATTTGTTCTTTACGGCTTCGGAAAAGATATTGCTATTCAAGGGATCATGTTTCCTGACGTATTTGTAAAGTTCACGTATCAATGATTCATCTTCAGCGGCACTAACAAAGGAGACAGCAGTGCCCTCATTTGCTGCACGACCTGTTCTACCAATTCTATGGATGTAGTCATCCATTTTTTTGGAAATCTGGAAATTGACTACCAAGGAAACATTAGGGATATCCAATCCTCTTGCGGCAACGTTTGTTGCGATCATGATTTGGACTTTGTTGGTGCGAAATAATTGCAAAGAATGTTCCCTTTGCTCTTGCGATTTAGAACCA
PRP28	YDR243C.line.24.chrIV.948518.950284_tile_2	YDR243C.line.24.chrIV.948518.950284_tile_2	Saccharomyces cerevisiae	R64-2-1	chrIV	948854	949267	-	TAGGTTTTGAGGACCAAGTAACAAACATTTTAACTAAAGTCGATATAAATGCTGACTCTGCTGTGAATAGACAAACCCTGATGTTTACCGCTACAATGACACCCGTTATAGAAAAAATTGCAGCAGGATACATGCAAAAGCCTGTTTATGCAACCATTGGGGTTGAGACGGGTTCTGAACCTTTGATTCAACAGGTTGTGGAATATGCAGATAATGACGAAGACAAATTCAAAAAGTTGAAGCCAATTGTCGCTAAATATGATCCACCAATAATAATTTTTATCAATTACAAACAAACTGCTGATTGGTTAGCAGAAAAGTTTCAAAAGGAAACCAACATGAAGGTGACGATTTTACAT
PRP28	YDR243C.line.24.chrIV.948518.950284_tile_3	YDR243C.line.24.chrIV.948518.950284_tile_3	Saccharomyces cerevisiae	R64-2-1	chrIV	949212	949614	+	AAATCAATCATTTTGTCAGCTTCATCTAGTACTAATGTCTCCACCTGTTTCATCACAAGTAAGTGATTTTCTAAAGAGTCAATTAAACGTCCTGGAGTGGCCACCAGGATGTCACAACCCTCCGATAGAGAAAATGAAATTTCCTCCAAGGAGTGTCCACCAACAATAGAAATTACTTTGCAGTCATAGTTGCTCTCTTTGGACCATATTTTTGTAACTTTTTGTGTTTCTTTTTGAATTTGCTGCACTAATTCCCTTGTTGGAGCTAAAATTAACGCTTTGGGGCCATCAATAATCTTCAAAGATGGTGGCCTTGGAGGTGACCTACTCATCTTGATTAGTATCGGTA
PRP28	YDR243C.line.24.chrIV.948518.950284_tile_4	YDR243C.line.24.chrIV.948518.950284_tile_4	Saccharomyces cerevisiae	R64-2-1	chrIV	949560	949964	-	AGATTTGCTATGGAAGGGAAAGACTCCTAAAAATGCTGCAGAATCTTCATATATGGGGAAGCATTGGACTGAGAAGTCCTTGCACGAAATGAATGAGAGAGATTGGAGGATACTAAAAGAAGACTACGCTATTGTTACAAAAGGTGGGACAGTAGAAAATCCATTGAGAAATTGGGAAGAGCTCAATATAATACCAAGGGACTTGTTACGTGTTATTATACAGGAGCTGCGATTTCCTTCACCAACTCCTATTCAAAGGATTACTATTCCAAACGTTTGCAATATGAAACAATATAGAGATTTTCTTGGTGTTGCCTCTACAGGTTCGGGTAAGACTTTGGCCTTTGTAAT
PRP28	YDR243C.line.24.chrIV.948518.950284_tile_5	YDR243C.line.24.chrIV.948518.950284_tile_5	Saccharomyces cerevisiae	R64-2-1	chrIV	949910	950326	+	TATAGCTCTAGTTGAAACGATAGGATCATATCCGCTCAGAGTATCTTCGCTTTCATTCCAAGAAAAGTGAAATTTAGAGCCATTTTGCTTTGATGGATTTCTCTTCTTATCATTTGTTTCATTGAAAAAACTGTCATCTCTAGAGTTTACCTTTTTAATCTCCACCTTAGCGCTATCACTTTGCGTAGGCGTCAAACTCTCTTCGTTCTCCTTCAAACGTTCTTGCTTAGATCTTTCTTGTTTATTCAAAAACCTAGGCTTGCTGATTTTACCTGATGTATTTTCATCTAGTCCTTTTTTCTTGTTTATACCAGCAATCAGCTGACTAACATCGATTGGTCTTGCCATCCGTCCTGTATGTTA
CDC40	YDR364C.line.25.chrIV.1202843.1204210_tile_1	YDR364C.line.25.chrIV.1202843.1204210_tile_1	Saccharomyces cerevisiae	R64-2-1	chrIV	1202813	1203255	+	TAGCTAGTCACATACATATATCTTACCTGCCGCTCCGCTGCAAATGACTTTACTTGTTTCTTGAGGATGCCAGTCCACTTGAGTTATAGGCTTGTTGCCTGGAATCTTGATGTTATTTAATAAGCGCGACGTATTCCAATCCCAAGTAAATAGTCTGCTTTTTGAATCGCCTGAACATATGTAACGACCATCACCAGAAAAAGCCAAGCTTATCCCATAACCAGCAGATGAATGCCCTTTAAATATCTTTTTTGGATGCCTCTTATATTTGGGTTTCAAACTGAAAGAATATATTCTATTATCCATGCTTTGTGCACAGAAATAGTTCTGAGACGGATGTACATTTAAAAATGGCATAGAATGTTGAGCCGTGTCACTTATTTGTTTTA
CDC40	YDR364C.line.25.chrIV.1202843.1204210_tile_2	YDR364C.line.25.chrIV.1202843.1204210_tile_2	Saccharomyces cerevisiae	R64-2-1	chrIV	1203201	1203619	-	AAGCCTATTAAAGCATTACGATTCACCGAAGACTGTCAATCTTTTTTGAGCTCTTCCTTTGATAGAAGCGTTAAAATTTGGGATACTGAAACTGGTAAAGTGAAAACCAGGTTGCACCTTAATTCAACGCCTGCAGATGTTGAATCTCGGCCCACTAACCCACATGAGTTCATTGTAGGTTTATCGAATTCGAAAATATTACATTATGATGATCGTGTTTCAGAAAATCAAGGTCTTGTGCAGACATATGATCATCACCTAAGTAGCATTCTGGCTCTCAAGTATTTTCCCGATGGTTCGAAGTTTATTTCTTCTTCAGAGGATAAGACGGTAAGAATTTGGGAAAATCAGATCAATGTACCAAT
CDC40	YDR364C.line.25.chrIV.1202843.1204210_tile_3	YDR364C.line.25.chrIV.1202843.1204210_tile_3	Saccharomyces cerevisiae	R64-2-1	chrIV	1203565	1203993	+	TGTTATGACCTTGAAAATCTCGTAGGCATTCATAGTCATGGTAGAAATCCCAAATTTTTATAGTATGATCATTACCACCAGAGAGAATTAAGTGTCCAGTTTTAGGTAAGAATTTCAGGGCAGTGGTTCCTTCTGGATGCCCCGGATAATTACGTATAACTTTTTTTGGTAAGTAACACCGAAAGGATATCCTTTCCTCACGAAGATCAACATCGACGTCATTTGGTGGATATAAATATCCTCTGCCTTGATAGTCCTTTTCTGATTTACCATAAAAATGGGAGACTTCCTCTACCTCTATCTGTTCCGAATCTAGGTTGTCCTCAGCCAGCGCGTGCACGAAGATATCCTGATCTTCTTTCTGAGTTTCGCTGG
CDC40	YDR364C.line.25.chrIV.1202843.1204210_tile_4	YDR364C.line.25.chrIV.1202843.1204210_tile_4	Saccharomyces cerevisiae	R64-2-1	chrIV	1203939	1204339	-	GTCCTTGCTAGAGATGAGGTAAAAAAAAAATCTTGAAATTTTTCCTTTATTTTTGGCCAAATAGTGCAACAAACACGGCATGTACTTTGAAGAGCAGATGAAATGGGTTTAGTAGACGGTTATGACACAAGCTCAGACTCTGATTTGAACTTCGACGAAGGCAAATCTGTTCATGAAAAGAAAAATGGTAATTTGCATGAAGATACTTCGTATGAACCTTCTTCAAATAATATTCATAAGAGAAAATCACATTTTACAAAGTCAGAACTAAAAAGAAGACGGAAAACTCGCAAAGGAGATGGGCCGTGGGGCAGTTGGTCAAGTAGTGACGATGAAACTTCACAAGC
LSM6	YDR378C.line.26.chrIV.1229349.1229609_tile_1	YDR378C.line.26.chrIV.1229349.1229609_tile_1	Saccharomyces cerevisiae	R64-2-1	chrIV	1229313	1229727	+	ATAAGTCTATATTTTTTGTTCACTGATATACATGACCTGCGTGCCCCTCAAAAAGACATCACTATTGAACTTATTTAGAAGCTTATTGTTATTACTCTCGTAGTGTTCAGTGGCACTCGATAGTGCAACATTCATAAAACCATCAATGGATTCCAATCTTCCGCTGTAGAGTAAACCCGAGGCAAGTTTGACGTTCACTGTCTTACCAATGATATCAGAGAGAAACTCCGTAGTAACGCTACCCTCTGTAGAAGCTTTTCCGGACATCACTAATAATCTCTGCTTGTTTTGCTTATACTGTGCAATGCCATATTTTCTCGTTAATATGGCGTCTTGTGCATTATTGAATGGGTTGCTG
SYF1	YDR416W.line.27.chrIV.1298432.1301011_tile_1	YDR416W.line.27.chrIV.1298432.1301011_tile_1	Saccharomyces cerevisiae	R64-2-1	chrIV	1298404	1298842	+	TATGTCAGCATACATCGCAATGAAAGGAGTAATAACAAACGTCGATGAGAACATAAGAAATGATGAAGATGTGGCTTTTGAGTACGAAATACAAAAGACACCGCAGAACATACTTACATGGAAAAGATATATCGAGTATTGGAAAGAGGAGGGAAGAACTGACAAACAGATTAGGTGGCTATATGAAAGATTTTGTTCACAATTTGTAACAGATACAAGTATATGGGAAGATTATATACGCTGGGAATCAACAAAGGAAGTAGTCGAAACTTCACGTATTTTCTGGCTTTTTCAAAGGTGCCTGAAAAGCTGTGTACGAGATTGTGACAGGATATGTTTGTCTTATTTAGAATTGGCAATTGAACAATATGACTTGGCAATGATA
SYF1	YDR416W.line.27.chrIV.1298432.1301011_tile_2	YDR416W.line.27.chrIV.1298432.1301011_tile_2	Saccharomyces cerevisiae	R64-2-1	chrIV	1298788	1299236	-	ACTTCCCACTATTTTCATCTTGTGGCAAATACTTTTCATATACTGATTTGATGGTAATATTGTCTCTAGTTAATGCAAGAGTTGCCAGCGATTCATTTCGTTTTTGCTGAGGAGCCACTTTTAAGTATCTTTCTAAAATATGTGACGACCAAATATCACCTCTACTTCCGTTTTCACTAATTTCCTCGCTAATAAAACCTCCCTTCGTGAAACCCTTCACTAAAAGTACATTTATCAATTCAGCTTCATCAGTACTTTCTTCTTCATCTTCTTGAGTTGAATCCAGTTGCGTTAATGGTAAAACTTTTTCTTCCACAAATTTTATGACAGGATCCCAAACTTTCCGATGCATTTCTCTCTCCATTTTCATTAAAGATGAAGCTAAGGCATGCCTT
SYF1	YDR416W.line.27.chrIV.1298432.1301011_tile_3	YDR416W.line.27.chrIV.1298432.1301011_tile_3	Saccharomyces cerevisiae	R64-2-1	chrIV	1299182	1299602	+	TATCTACCTAGTTCAGAACTGCCTTTTGAATTAAATTTCAATTATTTGGCCAGCCTAGAAAAACTAGGTTTAGATAATCAATATGAGGAGTTCATGAGGCAAATGAATGGCATATATCCCGACAAATGGCTTTTTTTGATCCTATCACTTGCCAAATATTATATCTCTCGCGGGAGGCTTGACAGTTGTGGTGATTTATTGAAGAAAAGTTTACAGCAAACACTTAGGTACAGTGATTTTGATCGCATCTATAATTTCTATTTGCTATTTGAGCAAGAGTGCTCCCAATTTATTCTGGGAAAGCTAAAGGAAAATGACAGCAAATTCTTTAATCAAAAAGATTGGACTGAAAAGTTACAAGCTCATA
SYF1	YDR416W.line.27.chrIV.1298432.1301011_tile_4	YDR416W.line.27.chrIV.1298432.1301011_tile_4	Saccharomyces cerevisiae	R64-2-1	chrIV	1299548	1299984	-	TCAAGGATAGAAAAAGCTCTTTCCACCCCTTCTTTATCTAATTCTCTATCAGCCCAGTTTAGGTAAATTTCTTCCAGATCTTCTATATAAGGATACGGTACCTTCAGAGATTGTGTCCACAATTCTCTAGCTGTACTAATTGCGTTTGATCTCCAATACAAATCCCCATACGAACACCAAAGCCTACCGAAAGAGCCAGGCGTACCAACTTTTCGGGGATCAATTTTCAGTATAGCTTCTGAATACACATTACACTTTTCCGCTGCTGACTTCTGCAAGGACACTCTTTTCATCCACGTTTCCACCAAGTTGGAATCTTGCCTTAGTGCGACATCGTTCAAATAGATATCATATAAGTTGATTAAAGATTCAAATGTCGCCAT
SYF1	YDR416W.line.27.chrIV.1298432.1301011_tile_5	YDR416W.line.27.chrIV.1298432.1301011_tile_5	Saccharomyces cerevisiae	R64-2-1	chrIV	1299930	1300360	+	AAGATGCATTACATGTGCCAACAAATCCAGAAATTCTCCTCGAAAAATATAAGAATGGACACAGAAAAATACCTGCTCAAACTGTTCTATTCAACTCATTACGTATTTGGTCCAAATACATTGATTATCTAGAGGCTTACTGCCCAAAGGATGCAAATTCCTCCGATAAAATATTCAATAAGACAAAAATGGCATACAATACTGTTATTGATTTGAGATTGATCACTCCAGCAATGGCAGAAAATTTTGCATTGTTCTTACAAAATCATTACGAAGTCATGGAAAGTTTTCAGGTGTATGAGAAAACAATCCCTCTGTTTCCCCCCGAAATCCAATACGAATTATGGATTGAGTATCTAGAAGTAGCGACATCACAT
SYF1	YDR416W.line.27.chrIV.1298432.1301011_tile_6	YDR416W.line.27.chrIV.1298432.1301011_tile_6	Saccharomyces cerevisiae	R64-2-1	chrIV	1300306	1300728	-	TCTCCTATAGAGCTCTCGAAATCTGAAAATTTAATCACAAACTCAACAGCTTTAGAGTTTGGTAAAATTTGAATGCATTCTTGGTACAACTCTCTGGTTACTGATGGTCCCAAAGTAGACTCGGCCTTGGAAATACACATTCTCCACAGTTGCAGTCTACTTTCGAGGTGCGTGCTCACACTAACAGTACCTATTACAGCACCTCTACGTAATATCTCAATACTCTTGCTAATCAGACCACTTATCCTTTCTTCAAATACGCTATAAGCGATAAAAATTGTTTTACAGTCTATACCATTTGAACATAGATTCTTAAGTGCTTTCTCAAACAAAAATCTAATATGTTCAGGACTCAGTGATGACAATTGA
SYF1	YDR416W.line.27.chrIV.1298432.1301011_tile_7	YDR416W.line.27.chrIV.1298432.1301011_tile_7	Saccharomyces cerevisiae	R64-2-1	chrIV	1300674	1301120	+	AAACTATTCGAGCACGTGAAATCCTTGCCTATGGTGCAAAGCTTCTTCCTCCATCCAGAAATACTGAATTATGGGATAGCTTTGAAATTTTTGAGTTAAAACATGGGGATAAGGAAACTTACAAAGACATGTTGAAGATGAAGAAGGTGTTGGAATCCAACATGCTCATTGATTCAGCTAGCGTTAGCCATGAGGAAGGTAACATTAACTTCGTGGCGGCAGCAACCTCGCATGCTCCCAACTCGCATACTCTTACCCAATCAACCTCTTCATATTCGATTAATCCAGATGAAATAGAACTAGATATTTGATATAAGCTATGTAAAATCATGCATCATTTTCGAAACCATAAGTTCTTTTTTGGTGCGGCCTTCTGCAATTACTGATTAAGTA
SPP41	YDR464W.line.28.chrIV.1388872.1393179_tile_1	YDR464W.line.28.chrIV.1388872.1393179_tile_1	Saccharomyces cerevisiae	R64-2-1	chrIV	1388834	1389276	+	ATTCTGCCATGGCTTATGATGAAGATGATGGAGAGATAAATTTTAATGAACTTGTGGGGAACTTACTAAGCTCACATAACCAAGAGGGACAAGAGGAAGGAGAAGTGCAAGGAGGAGAACAGGAAGGAGATGATTTTGAAAAAATATATCCTACCAGTGAAAATATAGAACCAAAGCATCCAGATGACAGCCAGCATATGCATAATTCTCCTGACCAGAATATCGAAATACCACATTTTGTCGACGAAGAAGATGAGCTAGTATCTGTCGTTGCAAATGCGGTTCAAAATATAGACGATGAGCAAGCCAAACCGGAAAATCATCTGGAAAATGGATCAGAACATGTAACATCGGATACAGCGGATGATAATCACGAAAAAGAACAA
SPP41	YDR464W.line.28.chrIV.1388872.1393179_tile_2	YDR464W.line.28.chrIV.1388872.1393179_tile_2	Saccharomyces cerevisiae	R64-2-1	chrIV	1389222	1389630	-	TTTGGAATGGCTCGAAGATTTACTCTTCTTTGAGGATTTATCCTTTGATGATTCTCTGTTCTTGGATTTATCTTTTTTCTTTTTCTTTGAAGATTTTTTGCTGCTCAACTTATCATTCGGGGCAGCATGCTCATGTTTTTCCGGCTCTTTCTCTTCCTCCTCATTTGTGTTTAATTCTTGTAGAGACTCTAGGATAGCCATCCTCAAATTTTCATCATCTTGGTCGAGAGCGTCATCAGTACGCTGAGAGGGATGGTGCTGACTAGTGCTTACACGCCTTTCTGTATTCTCCCGCAAGGGCTCTCCGTCTGATTTTAATATTTCCTGCTGTAAGATATGAGCCCATTCTTGCTGT
SPP41	YDR464W.line.28.chrIV.1388872.1393179_tile_3	YDR464W.line.28.chrIV.1388872.1393179_tile_3	Saccharomyces cerevisiae	R64-2-1	chrIV	1389576	1389994	+	AAAGCATGCCAAAGACCGTAATAAAGAAAAGCAAAGTAAACCTACTAATAATGAAAATACCCTTGATTTAAGTAATATACTAGAAAATCTGATTCATGAAAATGACAATGCTGCAATAGACACTGCCAAACAAACAGTTGATATTCAAGATAACTCCCATACTGATAATACAAACAACGAAGATGTGGAAGCGCAAGCTTTAGTGGAAGCGACACTAAAAGCATTTGAAAACGAGCTGCTAAGCTCTGCGCCAACCGAGGAGCCTTCACAAGAACAGTCGATTGGGCCTGTATCTTCTAGAAAAGCAGTTGAACCACCACGAAAACCGACTGCAGACGATATTCCATTGGCTATGTTACAGGCTT
SPP41	YDR464W.line.28.chrIV.1388872.1393179_tile_4	YDR464W.line.28.chrIV.1388872.1393179_tile_4	Saccharomyces cerevisiae	R64-2-1	chrIV	1389940	1390342	-	CAAGCGAGTCATCATTAGCTGTGCTTGCATCCTCAGTAGTATATTGACTTTGTACAGGGGAAGTAAAATCACTTTCGCTTTCTAATTTATTATCCTGTGTGGCAGTATGCGTTGATGTTTCTTTTAATGAAGTGTTAACCACTTGGTTAACCATATCGGCTAATATTCTGGAAAATTCATCATCTTCGTAAGCTTCTTGAGATTTATTACTTTCCTTTACAGTTTTCTTCTTTTTCTTTTTCTTGGAGGTAGATTCAGATGCAGGTGATTTATTTGCTGTAGATGCAGCCTTGGATGTCTTACTTTTTGTTTTTTTCTTCTCTTGAGGAGGCCTCTTTTTCGGTTTAAA
SPP41	YDR464W.line.28.chrIV.1388872.1393179_tile_5	YDR464W.line.28.chrIV.1388872.1393179_tile_5	Saccharomyces cerevisiae	R64-2-1	chrIV	1390288	1390695	+	GACTTGAATCAAATCATGCAAAACGCAATGGCTATGGTTTTTCAAAATCAAAACGACGATGAATTTGATGAGAACATTGTTGAAGACTTTAATCGTGGTTTAGGCGATCTGAGTGTTTCCGATTTACTGCCGCATGATAACCTTTCTAGGATGGAAAAGAAATCGGTGCCTAAAAGTTCGAGCAAATCTGAAAAGAAAACAGCTATATCTAGGAGAGCTTCCAAAAAGGCATCTAGAGATGCCTCAAGTGTAGAATTGACTGAAGTACCTTCAAAACCGAAGAAACCTTCCAAGACAGAAGTATCTTTAGAAAAGAAGTTACGCAAAAAATACGTCTCTATTGCCAACGAGGC
SPP41	YDR464W.line.28.chrIV.1388872.1393179_tile_6	YDR464W.line.28.chrIV.1388872.1393179_tile_6	Saccharomyces cerevisiae	R64-2-1	chrIV	1390640	1391040	-	TTTCTTCAAAGCAGATGAAGGTACCTTCATTTTCTTTTCCTTTTTCTTTCTTTCCTTTTTCACCTTCCTCGGTTTTTCAGCTTCCTGTGATCGTTTCAGTAGCTCTTCCGGAGTCCATCTTCTGTATGGTTTTTTTGGTTTACCGCTTTTAGTTAGTCTTAAATCTGGGGGATAAGGTGGACCTCGTTCAACAATTTTTTTCAGTTCCTCTTGTTCTTCAGCCAACCTCTGCTTCTCTAGTTTTTTTTTATGTCTCCTTTCCTCTCTGGCAGTTTGGCGTTCAAGTTTCTCTTTCTCCTTTAGTTCTTTGTTTTTAGCCCATCTTTTCTTTCTAGCCACAGATGCAG
SPP41	YDR464W.line.28.chrIV.1388872.1393179_tile_7	YDR464W.line.28.chrIV.1388872.1393179_tile_7	Saccharomyces cerevisiae	R64-2-1	chrIV	1390986	1391408	+	AATTCCTCTCTTCAACTTTGTAAAGGGTAATGTTCAGCCAAGTGCAAGACATCGTCTGAATGACATTGAAGGTTCGCTATCCACTATTGGATTACATAAATCGCCTGACGGTGTCCGCAGGATTCTTTCGAGACCAAAGAGTGAAGATCACGAATGGCCCCTATCAGATTCATCTGCATCTCAAAATTACGATGCACACCTAAAAACTGTAGTGCATAAAGAAAAAATTCCTTTCCATCCCCCATGGACTATACCGTCTCAACCACCATTTGCACTACCCGTAGCTAGAAGAAAGAAAATACCAAATATCAAAAAGTATAGAAAGAGAACCAATAATTCTTTTCGTGTCTCCAAAGAAGGTACGGCAAG
SPP41	YDR464W.line.28.chrIV.1388872.1393179_tile_8	YDR464W.line.28.chrIV.1388872.1393179_tile_8	Saccharomyces cerevisiae	R64-2-1	chrIV	1391354	1391774	-	GTGGCTTTATCAGGGGATTCAGAGCTGCTGATTTCTGTTCCTGCACTTCTGGCCGGTAATTGTTTGTCTAATTGTTGTTTCACTCGAGATGTATTGAAAATAGGAATCATTTTCAGCGGATTCTTCATTCGAGACGCAGTTGTTGCCAGTTCTGTGGTAGTTCCCTTAGAATGAGCGGCTTGCATACTGTTTTTCCTTGCTTGTAAAGCTGCCCTAATAACTGTAGACTTGGCATGTTGAATAATGGTTGCCAGCCGTTTCCTTGCCTCCTCAGGTGTGGCGCCAGCAGCTGTTTGCGATTTTGCAGCAGCTTTTAATGTATTTATTATCGGTAGTAATATGGCCGGTAAAATTCTGTTCCTAGTAC
SPP41	YDR464W.line.28.chrIV.1388872.1393179_tile_9	YDR464W.line.28.chrIV.1388872.1393179_tile_9	Saccharomyces cerevisiae	R64-2-1	chrIV	1391722	1392144	+	CGCCCGATCCCCACTCTAATTCTACAATCGCTGGGCATACTTTAAAGGGCGTTACTACGCCAATTAAAATAGAAGACAGCGATGCGAATGTTCCTCCTGTTAGTATAGCGGTTTCAACTATAGAACCATCACAAGATAAACTAGAACTTACGAAGAGGGCAGAGAGCGTAGAACCTGTGGAAAATAATGTTGAAACAGCGAAAGAAACCCAAAGCGTACAAGAAATTAAGGAGAATGTCGGTACCAAGGCTTCTGAGGAAGTTACTCTAACTGAAGACAAGACAAATGGGGATCCAAAAAATGAAAAGAGGATATTAATTGAATCTCCTGTCGAAAAAACGGATAAAAAGAAGCCAGGTGAGAAAATTGCT
SPP41	YDR464W.line.28.chrIV.1388872.1393179_tile_10	YDR464W.line.28.chrIV.1388872.1393179_tile_10	Saccharomyces cerevisiae	R64-2-1	chrIV	1392090	1392496	-	TTTCGGGCAGAATATTAGTGATAGTAGAGGAAAGAATGTCGGTGATATTACTTCCCAAATCAACGGATTCATTCTTTATTTCGGGTATTTTGGTATTTACCAAATTTTGAACTAAATTAATAACGCTAACTTCAGGCTTAATTTGCGGTCTTTTTAAGGGAAATATGATGGGAATTTTTGGTTTTGCTTCATTTAACGGTTTGAGAGAAACATCAATTAATTTGGGCTTTCCTGTTGTCGTGTTTACACTGTCTGGTTCATTACCCGTAAGTTGGGCTGCATCAGAATGCAATGTAGACTTTTCATCTCCATCTTTCTTATCAGACAGGCTCGCATCTTCATTCAAATCTGTA
SPP41	YDR464W.line.28.chrIV.1388872.1393179_tile_11	YDR464W.line.28.chrIV.1388872.1393179_tile_11	Saccharomyces cerevisiae	R64-2-1	chrIV	1392442	1392844	+	ATCACAGCCACTGATGTTAAAAACTACCAGTATGAAGATGAAAACGTAAAATACCTGAAAAAAACACCAAGACAGGTTTTGAATTTGGATGGACTAGTGCCTCCATCGGGTAGATGTATTACCAAAGCTAAACGTGTCCGCCGCATTAAAAAGCTTTCTGCTGACGCCACTACCGCACCGGAAGCCGATGGAAAGGCAAACAGCGAATCCATTACTTACACATTCGATATACCATCTCCAGAAGAGGTACAAAGTAAGCGTAGTGTAGTCCTAAAATTTGCCAAGGCTAGATTGACCGAGGCGGAGTTGAGTTGTCTAAAGAAGGAGATTAACAATGTGAGGAAACGGA
SPP41	YDR464W.line.28.chrIV.1388872.1393179_tile_12	YDR464W.line.28.chrIV.1388872.1393179_tile_12	Saccharomyces cerevisiae	R64-2-1	chrIV	1392788	1393187	-	TTCTCTTCTTCTTTGGTTGTAAAGAGGCTAACTTCTCCTCCCTGAACGACTCTTGAATATCTTTTTCAATACAGCGTGCTTTGTTAAGGTTATTCATGTTTACCGCAAGAATATTCAAAATCTCCTTGTCGTCAATCACAATCTTCGTGTTGTTTGCTTGCGTCTCAGTAGTTTCAAGGCGATCCTTGTACTTTTCTTGACTTACCTTTTCTTGAAATCTTTCTTCGATCCATTTAGACTTCGTTTCTGATTCTCCTTCCCCAAAAAATGCGTTCGCACGCTTTTTTAATCTAGACTTTACGTCATATTCCCAGTTCTTGGTGGAGTTCATCTCTCTCCATCT
SPP41	YDR464W.line.28.chrIV.1388872.1393179_tile_13	YDR464W.line.28.chrIV.1388872.1393179_tile_13	Saccharomyces cerevisiae	R64-2-1	chrIV	1393132	1393540	+	AAGAAAAGCATTTTACACTGAGGTGTTACTAGACATAATTTAGTTCATATGTCCATTTCTGCATAATCATATATACTTAAAGTAGCAAATGTATATAGTTTTTTCTTCCGATTTTCGAAACTAATATTAGTATTGGAAATCGGCCCCTGCCATTGTGCAATTTACATTATTCTATAATTAAGCAAACGTGATACGTGGATGGTAATAATAGTTACAGTTAAAGTAAGACCGCTTAACATCATTCCAATCTGGCAATTGCTCGTCAAGAGAATATCTGGTGTAATCGCATTTCATACCATATGTAGCAACATCGATCTCAACAATTTCTTTATATACATCGTAACACAACGATCTG
PRP3	YDR473C.line.29.chrIV.1404445.1405854_tile_1	YDR473C.line.29.chrIV.1404445.1405854_tile_1	Saccharomyces cerevisiae	R64-2-1	chrIV	1404417	1404865	+	ATCACGTTTGAACAGGTGAATAAAAATGCTCTGAATCAAACTGACCCAGCGTACGTAATAAAGAATCCTGATCATTGCATACTTTCATAAACCAGCCTTTGAATTTACAATCTTGTAAATAGCCTTCCCAAGTTTTTGATATTGAATTATTATGCATGTCCATTTTTATATCCCCAGTGTTTGTGTGCAACTCAAAATCTTCATTCCATTTTATCCTCTTCATCACCAAATTCTCATAAAATTTGCATGATTTTTCGTTACCCACGACTATAATTATTCCTGGTCCGTCATCACGTATACGGAGGCATAAACCCTTTAGTGATAGTTCTTTACTATTCATTTTCAACTTGAATCTTATTTTTGGGTTCTGTAAGTTTTTGAACTGGAACACCTTA
PRP3	YDR473C.line.29.chrIV.1404445.1405854_tile_2	YDR473C.line.29.chrIV.1404445.1405854_tile_2	Saccharomyces cerevisiae	R64-2-1	chrIV	1404811	1405239	-	AGATATGTAGCACATCCCTTACCTGAAAAGATCAACGAGGCAAAAGTATCAATCAAAGCATATCTAACGCAACATGAAAGGAAAAGATTAAGGAGAAATAGAAGGAAAATGGCAAGAGAAGCACGGGAGATAAAAATTAAGTTAGGACTATTACCTAAGCCTGAACCGAAAGTTAAACTAAGCAACATGATGAGTGTTTTCGAGAATGATCAAAACATAACGGACCCAACTGCCTGGGAAAAAGTAGTGAAAGACCAAGTGGACCTCAGGAAGAGAAAACATCTGGAAGAAAACGAAAGAAGACATGAAGATGCTATTAAAAGAAGGAAAGAAGCAGTCAATATGAACGTTGAAAAGCCGACAGTATACCATTGT
PRP3	YDR473C.line.29.chrIV.1404445.1405854_tile_3	YDR473C.line.29.chrIV.1404445.1405854_tile_3	Saccharomyces cerevisiae	R64-2-1	chrIV	1405185	1405619	+	TTATAGATGGGTGCTCATCATCATCATCATCGTCTACTTCATCAATATCTTCTGCTAGCTTTTCTTCGGCAGGCGATGTGCCATTCATGTCATATTTTTCCATCAACTCACCCTTTTCATCTAAATAAGCCGTGTCCCACCATTCATAGCCATGATTATTATCATAGTATATCTTGAACTTTGACAAATCTAATAGGAACTTATCCTCATGTAACTCTAAATTGGGTAAATCACCTGACTCAATTAATTTTCTTTTATCTTTCTCGTCTTCTTCTTGTTTTAACTTTCTTTTTAATTCTTCCTCCTCCTGCTGTTTTTGTAATGTTCTTTCTTGGGCAATTCTTTTACTGATTTCTCCCTTTTGGTAAAACTTCAGACCCC
PRP3	YDR473C.line.29.chrIV.1404445.1405854_tile_4	YDR473C.line.29.chrIV.1404445.1405854_tile_4	Saccharomyces cerevisiae	R64-2-1	chrIV	1405565	1405987	-	AATAACAAGAAATAGTCCTAGTAAAGTATTAGAATGCCAGATGACGTAAAACAATCAAAAAGACTCACAGAAAACATCAGGCGATCTATTGAATTGGCTTGAAAAAATGCCCCCAAGAAATACCTATGAAAAAGGTAATCCGAAACGCCAAAATAGTCCATATTATAAGCCAAGTTTCTTACGGCGTGAAGAAACTACCAATGATGAGGAGAAGTTTCAGGGCCATGGTCTGAAAACCGAACTTCACTCAGCGTTAAAGTCTTCAAATTTGAATCTTATCCGAAGAACTTATCAAACTGGTGAAAATCCCTATCTTAGTGATCCACACGATCGAGGCTCATCGAGCAGATTTAACAGGCGTTATGAACG
CWC21	YDR482C.line.30.chrIV.1420431.1420838_tile_1	YDR482C.line.30.chrIV.1420431.1420838_tile_1	Saccharomyces cerevisiae	R64-2-1	chrIV	1420403	1420845	+	CTGCTATTCATGTCGATGCTGCTCTTCCGTTAGACGCGCCTTACGAGGGGTGTACAAAGAGGACATCCGCTGCTGTTCTTGCCACTCGTTCGTCAGTTTTGCCCTCAACGCTTCACATTTCTTGTCAATCTGCTCTTCCGAGAGCGTTTCTTCCTCCTCCAGTCGGTCCCGTAGCTCGCTAACTTGTACTTCAATCTCACGTTTCTCCATATGAGTCTCTATCTGTTTCTGCACAGCAAGAGGCCTGCTTGCCTTGTCATGGCTGGCCTTTTTGATCGCATTTTGTCGTTGTTGCCGCTGCTGTTGACTACCCTGTGGTCTGCGCCTATTGTTGCTAGCAAGTGATCGCTGCACGTGGCCCGACGTAGATGACCCTTTTGCCGACTTGAGC
CWC21	YDR482C.line.30.chrIV.1420431.1420838_tile_2	YDR482C.line.30.chrIV.1420431.1420838_tile_2	Saccharomyces cerevisiae	R64-2-1	chrIV	1420793	1421203	-	TTACTGAGAAAGAGGGCCATGCTTTCGAGTGGAACTGCTTGCGAATATGGATATCACTTCCAGTATTATAGATTCATAAAATGTATAAACGAATTAAATCGCAAATTATCTCCTTTTCAGACTGTTTCTTCACCAAATTTCTTTTTTTTTTCCTACTAGAAGAAGGCGTAGCAGATAAGAAGGAAAAATTATATTAAGCGTGCGGGTAAAGGCAAGGAAGAATCAAGTAAGACCTCAAGAATGGCACTATAAGTGTGGTATTATAATCTGTGTAATCCTAATTTGAGCTCTACACAATACCATTCGACGGTTAACAGCTACTGCATCACCGTCCAGTCATGTCGTACAACGGAATAGGG
SNP1	YIL061C.line.31.chrIX.244657.245559_tile_1	YIL061C.line.31.chrIX.244657.245559_tile_1	Saccharomyces cerevisiae	R64-2-1	chrIX	244623	245057	+	TATATTCAATAGTCGGGCGCTTCTTTGGGAGCTGGTTGAGACTCTCGAGTCCGTGAGTTTCTAGATTTATATACAGAAGTAACAGCAGCAGTAGGAGTGGCGGCGGAGAGCAATGGCCTGTTTCCACGGTACCTCGCGTCCAATGTGGAACTGCCGTATCTATCAGCGCTATATGCGGAGGAAGAAGTTTCCCTGCGTGGCAGCCTGGGAGCATAATTTCTTTCGGCGGGATTTGATGTACTTGCGCTTGCAAACCTTCCTGGAAGCCTGCTGTCTCTGTTGGAATAGCCTCTGCCTCCTAGGCCGCCGCCCAATCTTCTTGGCTTGAAATATTTAACGGTTCTGCCTCTTTCTATGTCGACTATGCAGATTCTGTCTT
SNP1	YIL061C.line.31.chrIX.244657.245559_tile_2	YIL061C.line.31.chrIX.244657.245559_tile_2	Saccharomyces cerevisiae	R64-2-1	chrIX	245003	245433	-	TTGAAGCACTATATGGAGGAGTTTCCTGAAGGATCTCCAAACAACCATCTCCAAAGATACGAAGACATCAAACTTTCCAAGATCAAAAATGCTCAATTGTTAGACCGGAGACTACAAAATTGGAATCCTAACGTTGACCCTCATATCAAGGACACAGATCCCTACAGAACGATATTTATTGGGAGGCTACCATACGATCTTGACGAAATTGAACTGCAAAAGTATTTTGTTAAGTTTGGCGAGATCGAAAAAATTAGGATAGTCAAGGACAAGATAACCCAGAAGAGTAAAGGCTACGCCTTCATAGTTTTCAAAGACCCAATAAGTAGTAAAATGGCATTCAAGGAGATTGGAGTACACAGAGGTATCCAAATCAA
SNP1	YIL061C.line.31.chrIX.244657.245559_tile_3	YIL061C.line.31.chrIX.244657.245559_tile_3	Saccharomyces cerevisiae	R64-2-1	chrIX	245379	245791	+	AAGAGGTTGATAGTAAGTTTGCAACGCCAGTGATATTTGGATTTGTTTGTCTCTTCGCATATGGGTAATCGGTTGGTCTTTTGTAAGATAAAGGTGGCCTTGGCTTGAAAAGTCTCGACACGTCGTCTGGATACTTGGATAGATTATAATTCATCAAGGTTGAGGTGCCGATTACTTTTTTAAGGTTTCCTTTCGACAGTCGATGACCGTGCTGTGTGTCATTATCTTGCAGTTCTTTTTTTCTTCAGATGCGTTAATTTCCTACGAAGGGCGCATACAATGGTGCTGATGGGATTTATGAGCAAAACAAGTAGGCGAGCAAGACATGAACGAAATTGTAATGAAGCGTACTTCCTTTT
IST3	YIR005W.line.32.chrIX.364889.365335_tile_1	YIR005W.line.32.chrIX.364889.365335_tile_1	Saccharomyces cerevisiae	R64-2-1	chrIX	364843	365271	+	TAATATAAACAAAATAACAATGAACAAAATTCAGCAAATCAACGATAAAGAACTACAAAGTGGAATTCTTAGCCCGCATCAATCATGGCATAATGAATATAAGGATAATGCTTATATATATATCGGAAATCTCAACCGAGAATTAACAGAAGGTGACATATTGACAGTCTTTTCTGAATATGGAGTCCCTGTAGATGTAATTCTTAGCAGGGATGAAAACACAGGAGAATCGCAAGGTTTTGCATATTTGAAATATGAGGATCAACGGTCAACGATTCTAGCAGTCGATAATTTAAATGGATTTAAAATTGGCGGTAGAGCCCTCAAAATTGATCATACTTTTTATAGGCCAAAAAGGAGTTTACAAAAATACTA
IST3	YIR005W.line.32.chrIX.364889.365335_tile_2	YIR005W.line.32.chrIX.364889.365335_tile_2	Saccharomyces cerevisiae	R64-2-1	chrIX	365217	365657	-	GAAAAAGGCACGGGCGCATATGGATCCGATTCTGATGATGACGTTTTATCGATTCCTGAATCAGTTGGTACAGATGAAGAGGAAGAAGGGGCACAACCAGTTTCTACTGCAGGTATCCCATCAATTCCACCTGCAGGTATTCCTCCACCCCCACCCCTTCCATGAAGATTTAATTTGCTTTCTATAGATACGTATGTATACTAATTTCTGAAAGGATGTAGAATTACAAATATGATATTGATTATTTTTTTCTAGGCTATATGAATATAAGATATGCGATGAAAGAAAAAATTATTTAATTTGGTTGGTCCTTTTTAGCCAAAATGAGTTTCTCAGCATTGTTCTTCGAAACTATATCTCGATCCAATTCTTCCTTTACAGCTTCAT
MSL1	YIR009W.line.33.chrIX.374525.374860_tile_1	YIR009W.line.33.chrIX.374525.374860_tile_1	Saccharomyces cerevisiae	R64-2-1	chrIX	374497	374915	+	AATGGTTGAACCAGCAAGGAAAAAGCAGAGGATTGATCGCGATACTCATCACACTGTGGCTGAACCAGTAACGGAAGCTAAAAATACGCTGTACGTGAGCCAGCTTAATGAAAAAATTAATATGCAACGACTGCGAGTAAACCTTTTTTTGCTCTTTGCTACGTTTGGAGAGGTACTGAAGGTTAGCATGAATTTCAAGAAACAGCGGGGCCAAGCCTTTATCACCATGAGAACCATCGACCAGGCCAGTCTGGCCCAGATTTCATTAAACGGCGAGCGATTCTTTGGTAAGCCTTTGAAAGTTGAGTTCAGCAAGAGTGAAACTAAAACACTATGACTGGCTTAACGCTCTATTCATAGCAGCA
SNU13	YEL026W.line.34.chrV.101943.102323_tile_1	YEL026W.line.34.chrV.101943.102323_tile_1	Saccharomyces cerevisiae	R64-2-1	chrV	101897	102296	+	TAAAAACTATATTAAAAATGTCTGCCCCAAACCCAAAGGCTTTCCCATTAGCCGATGCTGCATTAACCCAACAAATCTTGGATGTCGTTCAACAGGCTGCTAACTTGAGACAATTGAAGAAAGGTGCCAACGAAGCTACCAAAACTTTGAACCGTGGTATCTCCGAATTCATCATTATGGCTGCTGACTGTGAACCTATTGAAATCCTATTGCATTTACCATTACTATGTGAAGACAAGAATGTTCCATATGTCTTTGTTCCATCTAGAGTTGCTTTAGGTAGAGCTTGTGGTGTTTCTAGACCAGTTATTGCTGCTTCTATTACCACCAACGATGCTTCTGC
SNU13	YEL026W.line.34.chrV.101943.102323_tile_2	YEL026W.line.34.chrV.101943.102323_tile_2	Saccharomyces cerevisiae	R64-2-1	chrV	102241	102681	-	CAAAGAGAAGACATATAGATCATTCACCATACAAGACCATAGATTTTTTCGATCCTGTAAAACTAAAAAGGTGACAATAAATCTCCTACGAACGAATAGGTGCCATGAGATCTTGCACCTTTTTGTTATGCCTAAATTACTACAGCTCAATTGATAATACATGTTTGTGCATTTACAGATGCACTCGAGTAGGTTATTCAATGAAGATATGACATATATCATACCACTAACAAAACAGCACTATTAGCGTCTGCACTAGTGGAAAGCAAAAAACTTTTTTATAGTATATAGATGGTACAAAAACTATGTTGATAGATATAATCCAATCTACTTAAATTAATAAAGTTTCAATCTTGTCCTTGACAGCGTAGATTTGGGTCTTGATAG
U4	snR14.line.35.chrV.167427.167586_tile_1	snR14.line.35.chrV.167427.167586_tile_1	Saccharomyces cerevisiae	R64-2-1	chrV	167397	167817	+	AAAAGGTATTCCAAAAATTCCCTACATAGTCTTGAAGTATTCAAAAGCGAACACCGAATTGACCATGAGGAGACGGTCTGGTTTATAATTAAATTTCAACCAGCAAAAACACAATCTCGGACGAATCCTCACTGATATGCGTATTTCCCGTGCATAAGGATGGAGTATTAAGGAAGGAAGTGAAAGAAAAGAAAATGCATTAAACGTAAGTAACAATAGTAATTGGACAATGAAGCTAACTAATATTCTGTTCCTTTTATATTCAGAAAAAAAAATTCGAAAACTAATATATCATTTTACACGATATTTGAAATTGAAATTTATCAAAATATTTACTTAATTAGTCTAAATATGTAATATGAAGC
PRP22	YER013W.line.36.chrV.178841.182278_tile_1	YER013W.line.36.chrV.178841.182278_tile_1	Saccharomyces cerevisiae	R64-2-1	chrV	178803	179230	+	ATATTAGAGATGTCTGATATATCGAAACTCATAGGAGCTATTGTGGGATCTGATGACCCCGTTATCATTGAATTTGTGCTGAATATCATAAATAAATCCGGCAATTTACAAGAGTTTATACGAAATATTCAAAAATTGGATGCCGGTATATCCTACGAAGACAGTATTAAGATGTATAATGCATTTTTAGGAAAGCAGGAAGAAGAAAAGGTACGAAATAAAGTTAAAAGTTCACCGTTAAGTCAAAAAATTAATCAGGTACTGAAAGATGACGTTAATTTGGACGACCCTGTTGTGACTGAATTCGTCCTGAGCATTTTGAATAAATCTAAATCAATAACTGAGTTCCAGGAACAACTGAACTTGATGCA
PRP22	YER013W.line.36.chrV.178841.182278_tile_2	YER013W.line.36.chrV.178841.182278_tile_2	Saccharomyces cerevisiae	R64-2-1	chrV	179175	179621	-	TATTTTTCATGGAGAGCGATATTTTTCCATTATTTTGTATTTTTATCACTTCGACAAAGATATGTTGGCCTTGTCTCACCACATCATGTGGATCTAATGTTCTTTGGTCTGACATTTCTGAAATATGAACTAAGCCATCACAATTCTTCATTCGCGTCCCAAAAATTTGGACGAAACACCCAAAAGTAGTTATGTTTCTCACTTTACCTTCATAAACTTTGTGAAGGACAGGGCTGGGGTCTAAACTTTCTATTTTTTGTACCTCTTCTTCAATCTTTGCTTCTATCTTTGCTGGTATCTTGGTGCTTGGAAGAACTGAGACTTCTTCTTTCATTACTGGTGGTGATGCAATTTGATATATCTTGAAAATTGTTTCATTATCGAGTCCGCTTT
PRP22	YER013W.line.36.chrV.178841.182278_tile_3	YER013W.line.36.chrV.178841.182278_tile_3	Saccharomyces cerevisiae	R64-2-1	chrV	179567	179971	+	ATTGATCAACATAGTGGAGAAATCCGGAAAAGAAATACTGAAAGTGTCGAAGATAGAGGTAGGTCCAACGATGCTCATACAAGCAGAAATATGAAAAACAAAATTAAAAGGCGTGCTTTGACTTCACCAGAAAGATGGGAAATTCGCCAACTAATTGCCAGCGGTGCTGCTTCCATCGATGACTATCCTGAATTGAAGGATGAAATACCCATAAATACTTCCTATTTGACCGCGAAAAGAGATGACGGCAGTATCGTTAACGGTAATACAGAGAAAGTGGACTCAAAATTGGAAGAACAACAACGAGACGAGACGGATGAAATTGATGTCGAGCTGAATACAGATGATGGG
PRP22	YER013W.line.36.chrV.178841.182278_tile_4	YER013W.line.36.chrV.178841.182278_tile_4	Saccharomyces cerevisiae	R64-2-1	chrV	179917	180353	-	CAGCCTGTATCAATTCAGACCTCATCGCGTATACAGGCAAAGTTTGACGCTGTGCACTGATTGGTAAGGAAGTTCTTTTGCCATACGAGATAGATTCATTCATTCTATTTTTTTCCCATTCAGTAACAATCAGCTGGTTTTTCAACATTTGAATTTCGTTCCTGGAATCTTTTTTGTTTTTCGTAGGATCATCAAACGACTGTTGTTTCCTAATCTGTTGTTCAATCTCTCTTTTTTTCCTTAACTTTTCTTCTCTATGATCTCGTATTGCATTAGAGCCGTTGATTGCTGAACGATTCATAAATCCTCTCGGGACTTTTGTAATTTTAGGCATTTCATATTTCTTGGCCCCCTTGACTTGCTGATCCTTTAAAAATTTGGGC
PRP22	YER013W.line.36.chrV.178841.182278_tile_5	YER013W.line.36.chrV.178841.182278_tile_5	Saccharomyces cerevisiae	R64-2-1	chrV	180299	180720	+	GTGCGTGACAATCAATTTCTGGTCATTGTTGGTGAGACAGGTTCGGGTAAAACCACTCAAATTACTCAGTATTTAGATGAAGAAGGGTTTAGTAACTATGGGATGATCGGATGTACCCAACCTCGTAGGGTTGCCGCTGTATCCGTTGCTAAAAGAGTGGCTGAAGAAGTTGGCTGCAAAGTTGGCCATGACGTTGGCTATACCATTAGATTTGAAGATGTTACTGGCCCAGATACCAGAATAAAATATATGACTGATGGTATGTTACAGAGAGAGGCGTTGTTAGATCCCGAGATGTCAAAATATTCAGTTATCATGTTAGATGAAGCTCACGAAAGAACTGTGGCAACTGATGTTTTATTTGCGT
PRP22	YER013W.line.36.chrV.178841.182278_tile_6	YER013W.line.36.chrV.178841.182278_tile_6	Saccharomyces cerevisiae	R64-2-1	chrV	180665	181087	-	CGATTGGATTTCACTTGGCAAAGCAGAATAAACGGGCAAAATCAGTAATTCGCCGATGCTGTCACCTAAAGTTTTCACCCTATCATATAAAATTTCACAGCATGAGTCTATTTCTTCCTGTCCAGTCAAAAAGACTAAAATATCGCCTGGGCCTTCATTAATATGGATGTCTATTACACAATCCAAAGCTGCCTCTATGTAATCCATTTGGGGCGTCTGTGAGTAGAGTACTTCCACGGGAAAAGTTTTACCAGGTATATTGATAATCGGACAATTTAAAAAGTACTCAGAAAATTTAGCAGAGTTCAAAGTAGCCGATGTAACTATTACTTTTAATTCTGGCCTTTTAATAGCCGCTTTCTTTAACAA
PRP22	YER013W.line.36.chrV.178841.182278_tile_7	YER013W.line.36.chrV.178841.182278_tile_7	Saccharomyces cerevisiae	R64-2-1	chrV	181033	181442	+	GAAAATTTTTGAACCCACTCCAAAGGGCAGTCGAAAAGTCGTATTTGCCACAAATATTGCGGAAACTTCAATCACTATTGATGGAATTTATTATGTCGTGGACCCTGGATTTGCAAAAATCAACATTTATAATGCAAGAGCAGGTATCGAGCAGTTGATAGTGTCTCCAATCTCTCAGGCACAGGCAAATCAAAGAAAAGGTAGAGCTGGAAGAACAGGCCCTGGAAAATGCTATCGACTTTATACAGAATCCGCATTTTACAATGAAATGTTAGAAAACACGGTTCCAGAAATTCAAAGGCAGAATCTTTCTCATACTATTTTGATGCTAAAGGCCATGGGAATTAATGATTTA
PRP22	YER013W.line.36.chrV.178841.182278_tile_8	YER013W.line.36.chrV.178841.182278_tile_8	Saccharomyces cerevisiae	R64-2-1	chrV	181387	181793	-	AGTAATTTGCCTGCTGCCATCTAGTATAAACGTTCAATAATGTTAAATGGTCACCGTATGGATGATGAAACTTTGCCTTCTTGCTATCTGCTTCCAATTGCCTATCTTTTGGACGATAAAAAACGTTCTGTACTGACAACATTGAGATTATAGTAACAATTTCATCCGAGCACTGATTATCAACAGATGACAATAAAGAGCGTGATAGAGTGGGATCCATTGGAAATAAGGACATCTCTTTACCTAAATTTGTTAGTTTTCCCTCGTCATCTAGTGACTGCAGGTGGTATAATTCTGTCAGTGCGTTAAGCATTAAATTTTTGGGAGGGGGATCCATGAAGTCAAATTTCAAT
PRP22	YER013W.line.36.chrV.178841.182278_tile_9	YER013W.line.36.chrV.178841.182278_tile_9	Saccharomyces cerevisiae	R64-2-1	chrV	181739	182187	+	TCGGAGCAGTATTGCAAAACAAACTTTCTGCATTTTAGACATTTGAAAAGAGCAAGAGATGTTAAAAGCCAAATTAGCATGATATTTAAAAAGATAGGCTTAAAGTTAATAAGCTGTCATAGTGATCCTGATTTAATTCGTAAAACTTTCGTGTCAGGGTTCTTCATGAACGCTGCTAAGCGAGACTCACAGGTAGGTTATAAAACCATCAATGGTGGTACAGAGGTTGGAATACATCCCTCGAGTTCATTGTACGGAAAAGAGTATGAATACGTAATGTATCATAGTATCGTATTAACTAGCCGGGAATACATGTCGCAGGTAACATCCATTGAGCCCCAATGGCTTCTCGAAGTAGCGCCTCATTTTTATAAAGCTGGAGATGCTGAAAGCCA
PRP22	YER013W.line.36.chrV.178841.182278_tile_10	YER013W.line.36.chrV.178841.182278_tile_10	Saccharomyces cerevisiae	R64-2-1	chrV	182133	182551	-	TATTGTTCTCTCTATTATACTATTTCTTTTTTTGAATACTCCGCGACTCCGAAGCAACAAAGTGTCGAAGGCAAGTTCAAAGGCGTTTTGTAACTAAACGAGCAATGGCAGCTTTCAATTAAAGAAAGGTTAGCGTTACTCTGTGATTTTTTTCATGTAAAAATTCTCAAGAGAGATAAAGTTGTTAAAAAATTAAATATAGGTCTATAAAACTCGATAATTATAATGCATAAAAAGCTAACAATGTTACCTCTTGATACCTAATGCCCTTTCCCTTGACTGCCTTATTGAGCTTAGTCTCCATGAATTTTGATCCTTGGCAAACTTGTTATGCAAAGGAATGATTTTCGCTTTCTTCCTAGACT
SMB1	YER029C.line.37.chrV.212587.213177_tile_1	YER029C.line.37.chrV.212587.213177_tile_1	Saccharomyces cerevisiae	R64-2-1	chrV	212555	212971	+	ACCTTATTTTCTTTTAAAACCTGGTGGGGGCTGAAACTTCCTTGTTTGAGGGGGCGCTTCATTATTAAACCTCGACCTATTTGCGCCGATATTATCGTTGCCACCATTGTATCTGCTCGACGATGGTTGGGCAATCTCCCTAGAATTGCTACTAGTATGCTTCGCATTGGCCGTGTTAGGTTTAGCGATCTTTCCCGGCTTTTTCTCTTTCTCTTTTCTTAGTTTCGTCTGCTTTTGCGCTTGTTTCTTTTCCTTTTTATCTCTCACTAGTCTTTCCTTCTTGGATAGTAGCGGCTTATCCTCCACCACTGTGGATAAGATCTGTTCTCCTCTTAGTATAGTCAGTCCCAACACTCTTTTT
SMB1	YER029C.line.37.chrV.212587.213177_tile_2	YER029C.line.37.chrV.212587.213177_tile_2	Saccharomyces cerevisiae	R64-2-1	chrV	212917	213355	-	AATGTGGGAAAAAATTCAAAATAAAAATTATGAAAATAAAAAATGAAATTTAAAGAAGCCTATGCTAGTTAGAAATGAACAAGACAGGGAAAAAAGTAGAAGGGGTAACAGAACCATCCGTATAACAGGTTTCCAGTAAAGTAAATAACTAATGAGCAAAATACAGGTGGCACATAGCAGCCGACTAGCCAACCTTATTGATTATAAGCTGAGGGTTCTCACTCAAGATGGCCGCGTTTACATCGGGCAATTGATGGCATTTGATAAACATATGAATTTAGTGTTGAATGAGTGTATAGAAGAGAGGGTACCCAAAACTCAACTAGATAAATTAAGACCGAGAAAAGATTCAAAAGATGGAACCACTTTGAACATCAAGGTAGAA
LSM4	YER112W.line.38.chrV.387232.387795_tile_1	YER112W.line.38.chrV.387232.387795_tile_1	Saccharomyces cerevisiae	R64-2-1	chrV	387194	387594	+	TTTTTCTCAATGCTACCTTTATATCTTTTAACAAATGCGAAGGGACAACAAATGCAAATAGAATTGAAAAACGGTGAAATTATACAAGGGATATTGACCAACGTAGATAACTGGATGAACCTTACTTTATCTAATGTAACCGAATATAGTGAAGAAAGCGCAATTAATTCAGAAGACAATGCTGAGAGCAGTAAAGCCGTAAAATTGAACGAAATTTATATTAGAGGGACTTTTATCAAGTTTATCAAATTGCAAGATAATATAATTGACAAGGTCAAGCAGCAAATTAACTCCAACAATAACTCTAATAGTAACGGCCCTGGGCATAAAAGATACTACAACAAT
LSM4	YER112W.line.38.chrV.387232.387795_tile_2	YER112W.line.38.chrV.387232.387795_tile_2	Saccharomyces cerevisiae	R64-2-1	chrV	387540	387954	-	AAGGAAAGCTCGGTAATAAAAAGAAGAAAAGCTTTTTTTAAAGAAAACGGTAATCAACATTCACATACACACACAGTACATATGTACCAATATATTTATATATGTACATAATTATTATAATACAAAATTTGTTTAAAATTCGACCTTTTGTGGAGAAGAGCTGTTAAAATGATGTTGGACGGACCCACCTAAACCATTGTTCATATTTTGGTTGTTGCTATTGATACTGTTGATACTGTTGTTAATGTTACTGCTGTTGCTGTTGTTGTATTGACGGTTTTGAGAGTATGGACGGCGGTTGCTGTTGCCGTTATTATTATTTCTTCTGTTGTAGTTACCTCTATTGTTGTTTGAATCCCTA
LSM5	YER146W.line.39.chrV.462585.462866_tile_1	YER146W.line.39.chrV.462585.462866_tile_1	Saccharomyces cerevisiae	R64-2-1	chrV	462557	463001	+	GCAAAATGAGTCTACCGGAGATTTTGCCTTTGGAAGTCATAGATAAAACAATTAACCAGAAAGTGTTGATTGTGCTGCAGTCGAACCGCGAGTTCGAGGGCACGTTAGTTGGTTTCGACGACTTCGTCAACGTTATACTGGAAGACGCTGTCGAGTGGCTTATCGATCCTGAGGACGAGAGCAGAAATGAGAAAGTTATGCAGCACCATGGCAGAATGCTTTTAAGCGGCAACAATATTGCCATCCTTGTGCCAGGCGGCAAAAAGACCCCTACGGAGGCGTTGTAAAAAGGCAAAAATTAACGCGAATTTGTATAGTGCATCTAAAAAAAATAATTAAGTATAAAAATAGATAAAGGAAATCAAGTGTTTCTTTTTTTTTTTTTGGTTTATTGT
BRR2	YER172C.line.40.chrV.529530.536021_tile_1	YER172C.line.40.chrV.529530.536021_tile_1	Saccharomyces cerevisiae	R64-2-1	chrV	529502	529924	+	TTTATTTCACATTTATTTCAAAGGACAACTCTTTATCTGCGTCAAGATATGAATCACAGACACACCAAATTGTTAAGTTATGTTTACCAGATGTCGGAGTGTCAAATTCCAATTCATATTGCTGAGTCTCTTTATTTAAAGTAACTTTCTTGATCGCATAAAGCTCTTTTTTAGATACTTCACCTAAAACCAACCACCAACTTTCTAGCTTATCAAACGGATACTTTTCAGATGTTACTTGTAAGTTCTCAGGTTCAACATCTCTTGTCAATTGAATGGTAATTTTCTGTTTTACACCTGAAATTAACGAATCAGAATTATTCAACGAATAAGTAAGTTCAACGTTGGGGTAATTGTTAACAAACGCGG
BRR2	YER172C.line.40.chrV.529530.536021_tile_2	YER172C.line.40.chrV.529530.536021_tile_2	Saccharomyces cerevisiae	R64-2-1	chrV	529870	530300	-	ACCTCTTCTGGTTCGGTGAGCTTTAAAGTTTTCTTATTGTTACAAGCATATTTTTCACGTCTTGAATTACCTGTCGACTTTCAAAATGATTTAAAAGACATTCTAGAAAAGGTTGTTCCACTAATTAACGTAGTGGTTGATATCCTTTCAGCAAACGGGTATTTGAATGCTACTACCGCCATGGATTTGGCGCAGATGTTGATTCAGGGTGTATGGGACGTTGATAATCCGTTGAGACAGATTCCACACTTCAACAACAAAATTTTGGAAAAATGTAAAGAAATTAACGTCGAGACGGTCTATGATATAATGGCCCTTGAGGATGAAGAGAGGGATGAAATTTTAACGCTTACTGATTCACAGCTTGCGCAGGTCGC
BRR2	YER172C.line.40.chrV.529530.536021_tile_3	YER172C.line.40.chrV.529530.536021_tile_3	Saccharomyces cerevisiae	R64-2-1	chrV	530246	530690	+	TGTGTTCAGGGAATCTCAATGGTAGTCTTTTACTTAATTTGACAAGTAATGCTCTGTCTCCTTTTCTGAGTGGAACACTTTCGAATTCTACTGCTGTTGAAAGAACATACAGCATGTTTTTGAGCGTTGACGTATTCGATAAAGAAGAAACGAATGACTGAATAGTAAAAAATGATACGCCATAGTGAGAAGCAATTAGCCCGTTGCTCAAGGTAGAAATGATTTCAGTTGCTTCATCATCTCCTCCATTAACTTCTGCGGTTACTTCAGCTTCTGTATCGTCAATTTCAATGAAGGATGATTCAACTAAGTCATTCAAACAAGTTTCAACTAAATTACTCAAAAAAACTGAAATTCCATGTGGAGACGTATCCCTTACGCCATAATAGCT
BRR2	YER172C.line.40.chrV.529530.536021_tile_4	YER172C.line.40.chrV.529530.536021_tile_4	Saccharomyces cerevisiae	R64-2-1	chrV	530636	531060	-	TTTACTCATTTCTAAGGATTGTTCTGCATTCGCTTGTAAAACTGATGAAGTGATTATTTTAGGAACCAACCTTTATGATGGTGCAGAGCATAAATATATGCCATATACCATAAATGAACTTCTAGAAATGGTGGGACTAGCTAGTGGTAACGATTCAATGGCAGGCAAGGTTTTAATTTTGACAAGTCACAACATGAAGGCCTACTACAAAAAATTCTTAATTGAGCCTTTGCCTACTGAGAGTTACCTACAGTATATTATTCATGATACTCTGAACAACGAGATAGCAAATTCTATTATACAAAGCAAACAAGATTGTGTTGACTGGTTTACATATTCGTATTTCTATCGTCGTATCCATGTGAATCCAA
BRR2	YER172C.line.40.chrV.529530.536021_tile_5	YER172C.line.40.chrV.529530.536021_tile_5	Saccharomyces cerevisiae	R64-2-1	chrV	531006	531449	+	AACCGATACCGCACCATATTCGTATAACCTTTTCACAATTCTTTCATCATTTGATGCCATCCCCTTATACAAAATACCAACACCGTGTTTTAAAGGTGCTCTTAGATGACCATCTGTTAACTTTTCAATGTATGGTACAATTTGCTCTTCTTCAACGTTCAACATATCCCATTCAATTGCTTTTGAAAACTTCATAAATGCAGACGCAACTTCCATACAATCCTTTCTAGATGGTAAGAACACCGAACTGGAATTACGATTTCCCGCTGCAGCAGCAGATGCTTCAAATGCCATTTGAAGCATCGAAAAATTGAATGATATGTGCTCAACATCTTTAAATGACTGAATATTAATTTCAAGAGGCTCAATTCTTTCGCTTGGAGAAAAGT
BRR2	YER172C.line.40.chrV.529530.536021_tile_6	YER172C.line.40.chrV.529530.536021_tile_6	Saccharomyces cerevisiae	R64-2-1	chrV	531394	531793	-	TGCTGGTGGTAAGATAATAAATAAGCTAGGAAATGATCCTTCACTAAATTTAAAATTATTAGCAAAAAGCCATGTTCTCTTGGCTACCCCCGTGCAATTTGAGCTTTTGTCACGTCGTTGGAGACAAAGGAAGAACATCCAAAGTTTAGAATTAATGATATATGATGACGCTCATGAGATTAGCCAAGGTGTTTACGGTGCTGTGTATGAAACGCTAATTTCTAGAATGATATTTATAGCAACCCAACTTGAAAAGAAAATTCGATTTGTTTGCCTTTCGAACTGTTTGGCAAATGCTCGTGATTTTGGTGAATGGGCTGGTATGACGAAGTCAAACATCTACAA
BRR2	YER172C.line.40.chrV.529530.536021_tile_7	YER172C.line.40.chrV.529530.536021_tile_7	Saccharomyces cerevisiae	R64-2-1	chrV	531736	532170	+	AAGATGAGAGAACCTTTTATTCCAATCAGATAGCAAAAAATCAATTTTTTCCCCAGACGGATTGATATAAACCGCTCTTCCTTTATTCTGTCTCCAATGATTTAACAGTGCTAATTCAGCCATAGCTGTTTTACCTGTGCCCTTTCCTGAACCTACAAAGACCGAGTCATTCGAATTGTAGAGAGACTCGAAGACCTGGCTCTGAATCTTGTTGAAAGTTTTAAATTCAAATACTTCGGAAAAATCATCATTGCCAAGCTCTGATGTTGAAATACTAATATTCTCCAGAAGGGGAGTAGGAGGAGGAAATTTTTTCGGAAGTTTAAATCCATTGAAGGAAACTGGAATCTCGAATTCACTGTGCCACCAATTTTCTGAT
BRR2	YER172C.line.40.chrV.529530.536021_tile_8	YER172C.line.40.chrV.529530.536021_tile_8	Saccharomyces cerevisiae	R64-2-1	chrV	532116	532532	-	CTAGAAACACCTGCCGAAGTTGGTCGTGCAATCAGATCTGAAAAATATGGAAAACAGGTTTACGATTTATTGAAAAGATTTCCCAAAATGTCCGTAACATGCAACGCTCAGCCAATTACCCGTAGCGTTATGAGGTTCAACATTGAAATAATAGCCGACTGGATATGGGATATGAATGTACACGGTTCCCTTGAACCTTTTTTGCTCATGCTAGAAGACACTGATGGTGATTCAATACTTTATTATGACGTACTATTCATCACTCCAGATATAGTTGGTCATGAATTTACCTTATCCTTTACTTATGAGTTAAAGCAGCACAATCAAAATAACTTACCACCTAATTTCTTCCTTACTTTGATA
BRR2	YER172C.line.40.chrV.529530.536021_tile_9	YER172C.line.40.chrV.529530.536021_tile_9	Saccharomyces cerevisiae	R64-2-1	chrV	532478	532888	+	GCTGTAGATAATCTCCCCACGGTACTGTAGAGGCTTCCAGCCTTTTAATCACTTCGACAGGGCATGTTTTAAACTGTCTTAAAGGACAGTTTGTTGGCCACATTTTAGTTGTGGCAGATTTGCAAAGATTTAACAACATCCGTGTGGGATGTCCCCATCCTCTCTTCAAGCATATTTCAAACATAGCACGCAATAACCTACCAGCATTTTGGTGAATAAACACTATATCAGAATTAAGTGCAAAACCTTCGAACTTTAGCTGGGAAAAATAAGACTGCAGTAGTACATTCACTTTTGCTAAAGGATCATCAATATCTTCTCTGATAGGAATGGGTGCTTTCTCTAGAAGTTGTTTTA
BRR2	YER172C.line.40.chrV.529530.536021_tile_10	YER172C.line.40.chrV.529530.536021_tile_10	Saccharomyces cerevisiae	R64-2-1	chrV	532834	533244	-	TGTGAATTGGTTGGCGTATACTTACCTATATGTCAGAATGTTAGCTTCCCCTATGCTTTACAAAGTACCTGATATTTCAAGTGATGGGCAATTGAAAAAGTTTAGAGAAAGCTTAGTCCATTCGGCCCTATGCATTTTAAAAGAACAAGAGTTGGTGTTATATGATGCTGAAAATGATGTAATTGAGGCGACCGATCTAGGAAATATAGCGTCGTCATTTTACATAAATCATGCTTCCATGGATGTTTACAATAGAGAGTTAGATGAACATACAACTCAGATTGATCTTTTTAGAATATTCTCAATGTCGGAAGAGTTTAAGTACGTATCGGTGAGATATGAAGAGAAAAGAGAACT
BRR2	YER172C.line.40.chrV.529530.536021_tile_11	YER172C.line.40.chrV.529530.536021_tile_11	Saccharomyces cerevisiae	R64-2-1	chrV	533190	533598	+	AGCATCATTCCTGCACTTAATGTTACCCGCGACAACTTCTGCATTTAAGTTGTCAACTAATTTTGAAACAAATTGCGATTCTATTGGTAATTGTTGATTTAAAACCGAGAGATAATATTGAACATTCGATTGGTCTGTTATTATAATACCCTCGCCAAATGTGTCATATCTCGGTCTGCCTGCTCTACCTAACATTTGAAGTACATCTTGTGGAGAAAGTTGTTCCCAGGACCCCTTTTCAGGTGAATAGACATCTGTTCCTTTTATAATCACTGTATGAGCAGGTAGATTAACACCCCATGCTAACGTCGCAGTGCATACCAATACTTGCAACAACCCGTCTGCAAATAAATCT
BRR2	YER172C.line.40.chrV.529530.536021_tile_12	YER172C.line.40.chrV.529530.536021_tile_12	Saccharomyces cerevisiae	R64-2-1	chrV	533544	533958	-	ATTTAGACCGTGTCCTCTATCTCAACAGTTTTGTGGCATTAAGGAACGGAACTCCTTGAAAAAGCTGAAGGCTATGAATGATGCTTGTTATGAAAAGGTATTGGAATCCATCAATGAAGGTAATCAAATAATCGTGTTTGTTCATTCTCGAAAAGAAACATCACGAACAGCAACATGGTTGAAAAATAAATTTGCTGAAGAGAACATTACTCATAAATTAACCAAAAATGATGCAGGATCGAAGCAGATTTTAAAGACAGAAGCAGCCAACGTACTCGATCCAAGTCTACGAAAGTTGATTGAAAGCGGTATAGGGACGCATCACGCAGGGCTGACCAGAAGTGACAGATCCTTATCTGAA
BRR2	YER172C.line.40.chrV.529530.536021_tile_13	YER172C.line.40.chrV.529530.536021_tile_13	Saccharomyces cerevisiae	R64-2-1	chrV	533904	534328	+	TGAGGAGTCAAAATAAAACAATCCTTCCTTCGGAACTCTTAAAAACCTACCGACATCCTCATAATTTGGTAAGGTGGCAGAAAGGCCTATTATTCTGGGGTATTCCTGGCCATATTTGGAAGCCCAAAATGTCCTAGCCACGATGCTTTCCAATACTGGTCCCCTGTCATCATGTAACAAATGTATTTCATCTATAATCAACAAACGAACAAGTTCTACGATGGCCAAATTATTTGAATTTCTAGTAGTTATGTCCCATTTCTCTGGCGTAGACACCAAAACCTGCGTCTCGTCAATTTGCTTTCTACTAAGCCTAGAATCACCAGTCAATTCAGCGACTTTTATACCTAGAAAAGCCAACCTCCTTTGAA
BRR2	YER172C.line.40.chrV.529530.536021_tile_14	YER172C.line.40.chrV.529530.536021_tile_14	Saccharomyces cerevisiae	R64-2-1	chrV	534274	534686	-	AGGGTGAAACCACAATATGACGAAATACATATTCCAGCTCCTAGCAAACCTGTTATTGATTATGAGTTGAAAGAAATTACTTCTCTACCAGATTGGTGTCAGGAGGCGTTTCCTTCATCGGAAACAACGTCCTTAAACCCTATACAATCAAAGGTTTTTCACGCAGCATTTGAAGGTGATTCAAACATGCTAATATGTGCACCCACTGGTTCAGGTAAGACGAATATCGCGTTATTGACGGTATTGAAAGCCTTATCCCATCATTATAACCCGAAAACTAAGAAATTAAACCTTTCTGCATTTAAAATTGTTTATATAGCACCCTTGAAAGCCTTAGTACAGGAACAAGTCCGAGAATT
BRR2	YER172C.line.40.chrV.529530.536021_tile_15	YER172C.line.40.chrV.529530.536021_tile_15	Saccharomyces cerevisiae	R64-2-1	chrV	534632	535051	+	TTTTGAATGATCCTTCCGGTAGGGATACTTTTGTCACGGTCATTAATTTAGAACTTTCGTCGAATTTAATCTTTTCCAAATCTATGACGGGCGGTATTGCTGGATTACTGAATTTTGTTCTTTTTGCTTCCGAAGACTGTGGCTGGTCGTCACCGGAATCGAGTTCACGCTTTGAGTGTGTAGTTTCTCTAAATTTATACTGTTCCACAAGATCATTCAAACCTTTTGCAACCATTTTCTCTATTAAGTTCGGTATTTCATTCTCTGTGCTCTTCGCCAGTCGTATGCCCCAAAAAATTGTAGATCTATTCTTGAGAATAAATTCAGCCAGTGATATATTCTCGAATTTAAGCAGATCAACCAACTT
BRR2	YER172C.line.40.chrV.529530.536021_tile_16	YER172C.line.40.chrV.529530.536021_tile_16	Saccharomyces cerevisiae	R64-2-1	chrV	534998	535445	-	TAGCAATAAACAAGCAGTAGCAATTCTTGCCGATGATGAAAAATCAGATGAAGAAGAAGTAACAGAAATGTCCAACAATGCTAATGTTCTTGGGGGAGAAATCAATGATAATGAAGATGATGATGAGGAATATGATTACAATGACGTTGAAGTCAATTCTAAAAAAAAAAACAAGAGGGCATTGCCAAACATTGAAAACGATATAATTAAACTCTCCGATAGTAAAACAAGTAATATCGAGAGCGTTCCGATATACTCAATCGATGAATTTTTTTTGCAGAGAAAACTTCGGTCAGAGCTTGGTTACAAGGATACCTCTGTAATACAAGACCTGTCAGAAAAAATTTTGAATGATATTGAAACACTTGAGCATAATCCAGTAGCGTTGGAGCAGA
BRR2	YER172C.line.40.chrV.529530.536021_tile_17	YER172C.line.40.chrV.529530.536021_tile_17	Saccharomyces cerevisiae	R64-2-1	chrV	535392	535838	+	ATTGTCAGGATGTGTTTCATAATCGGTAATGTTTTTCATAAGTTTAACTAATTCGTTAAACTTCAGGGAGTCTATATTGATGCCTAGCTCATGCTGGATCTTTTCCTTTCGCTCTTCAATATTACCATCCTCATTTTCCTCATTTTCTTTCAATTGTCTGATGAATATATCAGCAGTTCCAATAATAAGATCATGGGGTATATCATTGCCTAAAACTTCTGTAACCCACTGCAAAATCTGCTCGTAAGTTTCGACATTTGAGGGATCCTTTGGATAATAATGTAACCTGAAATCGGAGGAAGAATTCAAAATGGTGTTATGCTGCTGAATTTTTTTCAATGATGCGCTCTTTCCAGTTTTTTCAACGGCTACATCATTTTCTTTTAGTCCTTT
BRR2	YER172C.line.40.chrV.529530.536021_tile_18	YER172C.line.40.chrV.529530.536021_tile_18	Saccharomyces cerevisiae	R64-2-1	chrV	535784	536214	-	ATTGAATATTGTCGCTCTTTACGAGAATATTAAAAATTTATGCTACTAAAGCTATGTCTACTATAAAGGAATAATACACTAATAGAGATAATCTTGAGTAAAATAAGGTGAAGGTAAATATAAGTAATTGCTTTGGAAGATTTACCGTGAGCCTTCGTTATTAAAAATGACTGAGCATGAAACGAAGGATAAGGCCAAAAAAATTAGAGAAATTTATCGTTATGATGAGATGTCCAATAAGGTGTTGAAAGTTGATAAACGCTTTATGAATACCAGCCAAAATCCTCAAAGGGATGCGGAAATATCACAACCAAAATCCATGAGTGGTAGAATTAGTGCTAAGGATATGGGACAGGGCCTGTGCAATAACATTAATA
BUD27	YFL023W.line.41.chrVI.90986.93376_tile_1	YFL023W.line.41.chrVI.90986.93376_tile_1	Saccharomyces cerevisiae	R64-2-1	chrVI	90954	91374	-	TCCTCCATGTGATTCAAGTTGTCTAAGGTCTTTTTAGCCTCTTCGATCTTCAGGTTAAATTGCTCAATGGCGTCCTCCATTAGTTTTAATTTATCATCAACAAACGTGATGGCCTCCTCTTTGGTCTTTTCAACGTAATACTCATAGCCTAGACTTAGATATATCTTACTCGTAGAAATTATGATATCACCAAACACCATCCCTTGGCCTTCGCCTTCTTCTTCGCCATCATCATTGTCATTGATAAATCTAACCAGTCGGCTTCTGATATCTATATAGTGCTCTCTTTGTTCCGAAAGAAAGTTTCTCTTATCTTGCAGATTTTTCAACGTACTTTCTACGCTGGCCGCTAACAAATCCATGGCTA
BUD27	YFL023W.line.41.chrVI.90986.93376_tile_2	YFL023W.line.41.chrVI.90986.93376_tile_2	Saccharomyces cerevisiae	R64-2-1	chrVI	91320	91728	+	ACGGAAATGGAATTGAAGAAGACGAAGCGAACAACGACGAAGATTTTCTGCCCTCTATGGAGATTAGAGAAGAACTAGATGACGAGGGAAATGTCATAAGTAGTTCCGTTACCCCTACAACAAAGCAACCATCACAATCGAATTCCAAAAAAGAACAGACACCTGCAGTCGGTCCAAAGGAGAAAGGATTAGCAAAGGAGAAGAAATCAAAGTCATTCGAAGAAAACTTGAAAGGAAAGTTATTGAAAAGGAACGATGAAGTAAAGAAAAAAGTGCAGCCATCTAAAGTAGATACAGAAAACGTGTATACATTTGCCGACTTGGTCCAACAGATGGACCAACAAGATGAATTGGA
BUD27	YFL023W.line.41.chrVI.90986.93376_tile_3	YFL023W.line.41.chrVI.90986.93376_tile_3	Saccharomyces cerevisiae	R64-2-1	chrVI	91674	92105	-	TGCATCTGCCTCTTGTTCTCTTCTTTCAAGTTTTCGACTTCGTGAATTTCTAGAGAAGATGCAAACCCGACTTGTTTCTTTTTCTGCTTTTTGTCTGAATTCTCAGCAAAAGAAGACTTTTTCAAAATAGGTTTTAATGATTTATTAACGTCACCTTCTTCCCTCTCATGATCTTGGGATTGCTTTTGTGCGCGTAGGCGTTGAATTTGTTGTAAAAATGAGGACTGCGCTTCAAAGCCAGGTATAATAGAATGATTTAGATACTCTTCTTCATCTTCGTCCTCGTCATCCTCTTCATAGTTATCATTGACTTTGAAATTGGAGTTTTCGAACGCATCATAATCATAATTTATTTCATCAGTTTCAATATAGCCGTCCT
BUD27	YFL023W.line.41.chrVI.90986.93376_tile_4	YFL023W.line.41.chrVI.90986.93376_tile_4	Saccharomyces cerevisiae	R64-2-1	chrVI	92052	92495	+	AATCCTTTGCGGTGCCCATGTATGAAACCCAGGAAAGCACAGGTATCGCTAATAAAATGACATCGGATGAGTTTGATGGTGATTTATTTGCTAAGATGTTGGGTGTCCAAGAGGCCGATGAAGTGCATGAAAAATATAAAGAGGAACTGATAAATCAAGAGAGACTTGAAGGGGAAGCAAGCAGGTCGAATAGAAGAACTAGGGTGTCCAGATTCCGGAAGGATAGAGCTTCTAAAAAAGAAAATACGTTATCAACTTTCAAACAGGAAACGACAAGGTCAGTGGAGAACGAGGTAGTGGAAAAAGAGCCTGTTGTGGGGGATATTATAGAAAAAGAACCTGTTGTGGGGGATGTTATAGAAAAAGAACCTGTTGTGGGGGATGTTATAGA
BUD27	YFL023W.line.41.chrVI.90986.93376_tile_5	YFL023W.line.41.chrVI.90986.93376_tile_5	Saccharomyces cerevisiae	R64-2-1	chrVI	92442	92842	-	AGGAAATTTATCTTGCTCATCAGTGTTATTTTTACTTTTGTTGGACAAAAGTTTCTTATTACCATCGTCATCATCATCATAATCGTCATCACTTATATTTTCGAGAATTTTGGGATCAAATTTTTTTTTCATTGATTTCGATGATCTTGGTTTTTGCAGTGATTTTAGCTTTTTCTTTTTAAAAGGAGTCTCAAACTCGCTCTTGCTGTTAATTTCCGGTTCTTTTTCCACTATATCGTTGATAGTAGGTTCTTTTTCTATAATATCCCCCACAACAGGCTTCCTTTCCACTATATCGTTGACAGCAGGCTCCCTTTCCACTATATCGGTGACAGCAGGCTCTTTTT
BUD27	YFL023W.line.41.chrVI.90986.93376_tile_6	YFL023W.line.41.chrVI.90986.93376_tile_6	Saccharomyces cerevisiae	R64-2-1	chrVI	92786	93187	+	TTCAAAAATCCAAGAGGTGTCTAGGTCGATGGCTAAGACGGGCGCCACAGTAGGGAGTGAGCCGGTTAGAATTACAAATGTCGATTATCACGCCCTAGGTGGAAACTTGGATGATATGGTCAAGGCATATTCATTGGGGTTATATGACGACGATTTAGAGGAAGATCCAGGAACCATAGTGGAAAAGCTCGAGGATTTCAAAGAATACAATAAGCAGGTGGAGTTGCTGCGTGACGAAATTCGAGACTTTCAACTAGAAAACAAGCCAGTGACGATGGAGGAGGAGGAAAATGATGGCAATGTTATGAATGATATCATTGAGCATGAATTTCCTGAAAGTTACACAA
BUD27	YFL023W.line.41.chrVI.90986.93376_tile_7	YFL023W.line.41.chrVI.90986.93376_tile_7	Saccharomyces cerevisiae	R64-2-1	chrVI	93134	93550	-	ATTGGACGAAGACTTGTACGAATAAGCTCAGCAGTTCCTCTAGTTTTATATCGTCTGTCCCCAATTTTGTAGTAGTTATTGTACACAAAACAAATATATACGTATATGTTAATATAGATTCTGATTTACTTTCTGTCTCCATATGGGTTATGGTTTACTGTCCATATGGAGCCGTTGAGAGCGGAAACGACTTGTCTTGACCGGGTTCCCGAACTTATCAATAGGCTCCAATTCGCCTTCAGTGTGTGCGGCGGGTGATGATGATTGCCATTTCGACGCGGTAGCTTCTTTCAACCGTCTGTACTCTATAGCAACCTCTTCCTGTAGCCGGCCCGGATGTAGTGCTACTTCGTCCTCGTCATT
SMX2	YFL017W-A.line.42.chrVI.103699.103932_tile_1	YFL017W-A.line.42.chrVI.103699.103932_tile_1	Saccharomyces cerevisiae	R64-2-1	chrVI	103673	104105	+	AATGGTTTCTACCCCTGAACTGAAGAAATATATGGACAAGAAGATATTGCTGAATATAAATGGATCTAGGAAAGTGGCAGGAATTTTGCGAGGCTACGATATTTTCTTAAACGTCGTTCTTGATGATGCAATGGAGATAAATGGTGAAGACCCTGCCAATAACCACCAGCTAGGCTTGCAGACCGTCATTAGGGGCAACTCCATAATATCCCTAGAGGCTCTAGATGCCATATAAAATTATATATATATATATATATGTCGACCTCTATGTACTATACAGCAATACTATTTTCTAATTTGCATTTCCACGCCTGCGTTGCTAAACCCACATTTTTCATAGAATTTGACATTTTTCTCATCGCAATCTAAAATAATCTTATA
SAD1	YFR005C.line.43.chrVI.154527.155873_tile_1	YFR005C.line.43.chrVI.154527.155873_tile_1	Saccharomyces cerevisiae	R64-2-1	chrVI	154479	154912	+	TTTTTTACTTTCTTTTCTTTCACTCTTGCTTTTCCCATACTTGTATAAACGTTTCCTTCAAAAATAAAAGCTCGGCTTCTCTCTCTGTCGTATTTATGCCATCTATTTCTATCCATTTTTCACTTTTGTTATCATACAGCTGAGTAATCCAATGGCTTTTTTCATCACCATTAAATGCGTTTCCATCTGTGGATGGTTGTTTAATGACCACATGGACCACATTTGCTTTTAAGCGATACTTGACGTGCAAAATTTCAAGTTCACTGGAAAATTCCACCAACGTTTGGTTTCTATTTTTGACAGGATGATCACTGTTACGGTCAAACCTATTGAAATGAAATATTAAAAACTGCGGTAATCGCGTTAGTTCAAAAACG
SAD1	YFR005C.line.43.chrVI.154527.155873_tile_2	YFR005C.line.43.chrVI.154527.155873_tile_2	Saccharomyces cerevisiae	R64-2-1	chrVI	154857	155277	-	TCATCTTTCAGTTGACGATTTTGTATCCTATTTGAAAGTTAGAGAAGGTTTAAATTTAAATCCTATAGACCCGCGTCTCTTCCTTTTGTGGCTATTCAATAAAATTTGCTCGTCCTCGAACGACTTAAAGTCAATTTTAAACCATTCTTGTAAAGGCAAAGTAAAGATAGCAAAAGTTGAAAATAAGCCTGAGGCCAGTGAGTCTGTTACAGGAAAAGTCATTGTCAAACCATTTTGGGTTCTGACTCTCGATTTGCCGGAGTTTTCACCCTTTGAAGATGGCAACAGCGTTGATGATCTCCCACAAATAAATATCACTAAATTATTGACTAAATTTACTAAGTCAAGAAGCTCCTCTACTAGCACC
SAD1	YFR005C.line.43.chrVI.154527.155873_tile_3	YFR005C.line.43.chrVI.154527.155873_tile_3	Saccharomyces cerevisiae	R64-2-1	chrVI	155223	155655	+	ATGTTTGAATAGTTTAGGGGACCAAATTTTCTTTACACATATGGATAACCTTTTGATAAATTCCCCTTGATTATCAAAATGATTCAGTAGGAAGTGGTCCCGCACTGGAACCATGTGCGATATCAAAAGCAATACACTATGCGCATAGTCATAAGTTGCCGCATTGGTGAACCCTATAAATCCATTCAGATATGTGCGATTGCTCAAATCAAAACACTGTCTCGGAAAATCTTCTAGATCTTTTGGACAATAAGTCGGATAAGCTGCAAATTTTATGCTGTTCAACAATTGAACCTCACCGTCATGTAAAATTTGGACATTTTGCGGCAACATGTAAAACTTCAAACTTGTCAAATTCAAGAAGACGTGATGGTTTTCA
SAD1	YFR005C.line.43.chrVI.154527.155873_tile_4	YFR005C.line.43.chrVI.154527.155873_tile_4	Saccharomyces cerevisiae	R64-2-1	chrVI	155601	156023	-	AAAAAAAAAAACTGGAAAATCTTGATAAAAAAATGACGAAATAGGAAAAAAAATTGGCAGCAATCTAACCATGCTCTTCATGGTTCATCATTTAGTGGGCGTTAACCTAAAGCGCTGTTTATAATGGAGGTTGATAACAAAAGGAGACATTCAGAAGATGAGTTAAAACAGGAGGCAGTAAAAAAGATAAAGTCTCAGGAACCAAACTATGCCTATCTTGAGACTGTAGTAAGAGAAAAACTAGATTTCGATTCTGAGAAAATTTGCTGCATTACTCTGTCCCCTTTGAATGTATATTGTTGCCTCGTGTGTGGACATTATTATCAGGGGAGACATGAAAAGAGTCCTGCTTTCATACATTCAATTGAT
BUD13	YGL174W.line.44.chrVII.174545.175345_tile_1	YGL174W.line.44.chrVII.174545.175345_tile_1	Saccharomyces cerevisiae	R64-2-1	chrVII	174515	174949	+	ATTACATGGCATTGCATCAGTATTTATCAGAGACTTATGGGCCCACGAAACCCAAAAATAAGACGAAAAAGAAGAAGAAAGAGTCAAAATCAGACGCTAACTCAGACAAAACTTCTTTGATAGTAAAAGAACGGCTAAGTACACTGCAACAAGAACAGGAGAAGTCAGGAGTTGCTTCATTCAGCAAGTTTGACAAACAAAAAAGCAAGAATATATGGAAGAACCTGGAAACAAACGAGCTTTCCCATGCAATAACACATCCTTCCGCATCGTCAATTACTGGCAACGAAAGCAAGAACGATCTAAAGGAAATCAGGGCTCAAGAGCCACTTGTCACAGTAGCAGACAAATCGAAAACACGAAAAACCATATACAGAGACGCT
BUD13	YGL174W.line.44.chrVII.174545.175345_tile_2	YGL174W.line.44.chrVII.174545.175345_tile_2	Saccharomyces cerevisiae	R64-2-1	chrVII	174895	175301	-	TTTCTTCAAAGCCATTTGATCTGTGGACACCGTCCCATCTTGACCCAGGCATAATGGCAAACCTGTTCTCAGGTGCTGGCTTATCATAAAGCTTGCGGCCCAGTAAAGATGTTTTTACAGTTCTTTCTTTGTCATGTGTAAATGTTATTGCAGGGTCTTCTATCGTCAGACTCGAGGCAGTTTGATTTTTCTTCTTATCATGTGCATCTACATTTATTCCAAGCTTTTGCACGTCTCCCATATTCAAATTTTTCAGGTATTGCTCTCTTTCCGCGGCTTTCTCATCTTCATATTTAGATCGACTAAAACTAGAATCGTCTATCTTGGAATCTTCCTGAATCTTGTGACCTTGA
BUD13	YGL174W.line.44.chrVII.174545.175345_tile_3	YGL174W.line.44.chrVII.174545.175345_tile_3	Saccharomyces cerevisiae	R64-2-1	chrVII	175247	175655	+	AAATGGTTTGCTAAGCAAAATGAGATCAATGAGAAGAAAGTGCAAAGCTACACCCTACAGGAGGATTATTGAAAATGAGATAATATATAACTATGCGGAAAGCTTTGTGTAAAAAATACCCTTTGACAATCCCCATTTGTTATAAGCTTTTTCTTAACAAGATCAACGATTAAATACAAATACCCCTCTTTATATAGGTCTCAGATATACTATTAAAGTAACCTCGAATATACTTCGTTTTTAGTCGTATGTTCTAAGTAGATTCGTCTTTTTTATTATCACGGTCAGCAGCATTGCTTTGTGACTTTGGCGATTGACATTCAGTAGAGTTTGTGCCAGAAGAAGGTTTAATCTC
CWC23	YGL128C.line.45.chrVII.269293.270144_tile_1	YGL128C.line.45.chrVII.269293.270144_tile_1	Saccharomyces cerevisiae	R64-2-1	chrVII	269263	269693	+	AAGCTAGTCGAGTAGGATAGGTTCATTAGAGACCAGTCTTGCAATATCGTCATTCAGTTCCGTCTCCAAATTAAAATCAGAGTAGTAATGTAGCGGGATCAAGGGCGAAATATCCTTGACCGTGGGTATGAGGTTCCCACTTGACCAGTTTCGGAATACGTGCTGCGCTGTGATGGGAGTATCGAATACAGTATATATGATGATTGAATCATCCTTCGAGTAGTTGTTTCTTTCAGAGAAGTAGATGTCGTAGATTTCATTAGCACTTAGCGTGATGAATACTTGATTGCGCAAATGAGATAAGCAGTTTGATTTATTATTTGATTGCAGGAAGTTGTCAAGGACAATTCTCAAAGTAGAGCAATCGTAATACGGAT
CWC23	YGL128C.line.45.chrVII.269293.270144_tile_2	YGL128C.line.45.chrVII.269293.270144_tile_2	Saccharomyces cerevisiae	R64-2-1	chrVII	269639	270067	-	GCCCCAAATTAAACGCAAATACAGGACCCTTGCCCTGAAGTATCATCCTGACAAACACCCGGACAATCCATCAATTATACACAAATTCCACTTATTATCGACCGCAACTAATATCCTCACCAATGCAGACGTGAGACCCCATTACGACCGCTGGTTAATTGAGTTCCTACGGAAAACAAACGACATTGAAAGAAATAAACTTATACAAAAGCTGGAAGAATCTGAATCGAGTACGATACCCACCACCACACCACATCCTGATTTATTGCAAATCCAACGCCACGGCGAGCTACTCAGGAAACTAAAACATTTCAACTTGCCCTATGGTGACTGGAAACATCTCAACACACAAGACCAAGAAAATGCTTCGCAACA
CWC23	YGL128C.line.45.chrVII.269293.270144_tile_3	YGL128C.line.45.chrVII.269293.270144_tile_3	Saccharomyces cerevisiae	R64-2-1	chrVII	270013	270461	+	CAAATCATCGTAGATGGTATGGACGTCCAGGGGGGTCGGTAATTCTAATACATCATATAGGTTCAAACGTTGATTTATTACGTCTTCCAATTCGTGTCCTGGCATAGTCGTGGCGAGGCTTGTAGTACGGCGATGGACTTGCTTTTTGATTTTGCTTTCATCTTCTAATGTCTTGCGAGATAATATGCAAGGAAAACAAAGGAAAGAAAATACAAAGTAATGCGGCTTGCATATATATATACATATATATATGTATATATGTGATATATATATGTGTGTGTGTGTATATATATTCATGAGTGTATAAAATAGATATATGAATGCGTGCGAATGTAGTTATAATTAGGTGTGTTCAGTTGGCCCATCTTTCTACCATTTCATTCATCCATTGCGGG
PRP43	YGL120C.line.46.chrVII.281634.283937_tile_1	YGL120C.line.46.chrVII.281634.283937_tile_1	Saccharomyces cerevisiae	R64-2-1	chrVII	281536	281980	+	ATTTTCTCTCTATGAAATAGTCCTATAAATTTATATAAATCTATTTTTTTTTTTTTTTCGACACAAAATGTCTATTTCTTGGAGTGCTTACTCTTCTTTTTGTTTTTACCTTGTTTCAACTCGTTTAATCTATCAACTTTTTCCTTGATCCTTTCCAAAGATAATTTGACATCACCTTTTTGGAAATTGCTTAAGTCGTAGTATGCAGGCGCTATTTCAATCAGCCATTCGGGCCTGACCGAGGTCACAGTTCTTATGTAGTTCTTCGATGTGAGCACAAATTCATTGTAAATGACCCATTCTGCGTCGTGGCCAAGAACCGTACTAGGATGGATCAGAACATCTTGGTTATCTTTAACTGTGATGTATCCTTTAGCTCCCGATCTTTTTT
PRP43	YGL120C.line.46.chrVII.281634.283937_tile_2	YGL120C.line.46.chrVII.281634.283937_tile_2	Saccharomyces cerevisiae	R64-2-1	chrVII	281926	282372	-	TGGGTCCTTTGAGTTCCAATGTTCTCAAGAAATACTAACTATAGTGGCCATGCTATCGGTTCCAAACGTGTTTATTCGCCCAACAAAGGACAAGAAGCGAGCAGATGATGCCAAGAATATCTTTGCTCATCCAGACGGTGATCATATCACCTTACTAAATGTATATCATGCGTTCAAATCGGATGAAGCTTATGAATATGGTATCCATAAGTGGTGCCGTGACCACTATCTAAATTACAGGTCCCTTTCCGCTGCTGATAATATCCGCTCCCAATTAGAAAGATTAATGAACCGTTACAACCTAGAATTAAACACTACAGACTATGAAAGCCCTAAATACTTTGACAACATCAGAAAGGCTCTTGCGTCTGGGTTTTTCATGCAAGTAGCAAA
PRP43	YGL120C.line.46.chrVII.281634.283937_tile_3	YGL120C.line.46.chrVII.281634.283937_tile_3	Saccharomyces cerevisiae	R64-2-1	chrVII	282318	282729	+	AATTAACATCACCGCTAGCATAGGATCCAAGGGAAACTGGGATGCCAATCTACCTAGGGGTGTTAAGTTACCTTCGTCGTCCAGACATGCCAAATAATTTAGTTCTTCAAGGGCTCTCATCATTGTTTCCGGAGCCGGTGGATCCATAAAATCGAAATGGACCAAGTCATCAATACCTAATTTTTTTAGTTCTAGAACGGTGGAGGATAAATTGGAACGTAAAATTTCTGGGTAACTTTGCTCTATCAGTTCCTTTTGGAATGCCTCTTCAGTGTATAATCTGAAACATTTACCAGGCCTTGTACGACCAGCACGACCAGCTCTTTGTTGGGCAGAAGCCTTGGAGATAGGGGAAAC
PRP43	YGL120C.line.46.chrVII.281634.283937_tile_4	YGL120C.line.46.chrVII.281634.283937_tile_4	Saccharomyces cerevisiae	R64-2-1	chrVII	282674	283088	-	ACTGTTTTGCAAATTCATGCCACTGAAGAGGCTGGCGATATTTTGTTATTTTTAACTGGTGAAGATGAAATTGAAGACGCTGTCAGAAAGATTTCCTTAGAAGGTGATCAATTGGTTAGAGAAGAGGGATGCGGACCTTTATCCGTATACCCACTGTATGGTTCATTACCACCGCATCAACAACAAAGAATATTCGAGCCTGCTCCAGAGTCACATAATGGTAGACCAGGCAGGAAAGTTGTTATCTCCACGAACATCGCTGAAACTTCTTTAACAATTGATGGTATTGTCTACGTCGTTGACCCAGGATTTTCAAAGCAAAAAGTTTACAATCCAAGAATTAGAGTTGAGTCTTTACTTG
PRP43	YGL120C.line.46.chrVII.281634.283937_tile_5	YGL120C.line.46.chrVII.281634.283937_tile_5	Saccharomyces cerevisiae	R64-2-1	chrVII	283034	283462	+	TACGAATGGCAGAATCTAAATAGTCCCTTTGAAATTCCGGTGTATAGTATAGCTCAACTGGATATGTTCTGCCCGGAACGGCAAGTAATGGAGCATCGTTGAAGTAGCGTTGGAACTTCTCTGCATCCAGAGTAGCAGACATAATAATTATCTTCAAATCAGGTCTCCTCTTGACTACTTGCTTCAAAAGACCCATCAAAATATCAGTAGCTAGTGTACGTTCGTGCGCTTCATCCAGAATGATACATGAATAACGCGACAAGTCATGGTCTTCCATTGCCTCTCTCAACAACATACCATCAGTCATATACTTCAATATCGTTTTATTAGAAGTTTTATTTTCGAATCTGATAGAATAACCAACTTCTTCGCCCA
PRP43	YGL120C.line.46.chrVII.281634.283937_tile_6	YGL120C.line.46.chrVII.281634.283937_tile_6	Saccharomyces cerevisiae	R64-2-1	chrVII	283408	283844	-	CCACTTGTCCATCATGATGCTGGTGAATTCAAGGGCTTGCAACGTCACCATACTTCAGCAGAAGAGGCCCAAAAACTTGAAGATGGAAAAATAAATCCATTTACCGGTAGGGAGTTTACACCAAAATATGTTGATATCCTGAAAATTAGAAGAGAATTGCCAGTACATGCCCAGAGAGATGAGTTTTTAAAACTTTATCAAAATAACCAGATTATGGTTTTTGTTGGTGAAACAGGTTCCGGTAAAACGACACAAATTCCTCAATTCGTTTTATTCGATGAGATGCCACACTTAGAGAACACTCAAGTTGCATGTACTCAACCTCGTCGTGTCGCAGCAATGTCTGTTGCACAGAGAGTTGCTGAGGAAATGGATGTCAAGTT
PRP43	YGL120C.line.46.chrVII.281634.283937_tile_7	YGL120C.line.46.chrVII.281634.283937_tile_7	Saccharomyces cerevisiae	R64-2-1	chrVII	283790	284202	+	GCTCTTCGGATGGAAGAGGATGCTGTTTGGATAATTCTTCCGCAATCTCGGCGGCCTGCTCAGGAATAGAGGTCTCAACTGGATCCGGGTGTTCGGACGAGAATCTTCTTTTGGAACCCATTATTATTCTTGCAGTCCTAATCTTTCTATGCGCGTTTATAAGGTTATACTATCGTTACTCAATCGCATCCCCGTAAACGTGTTAAATATTACAATTGAATAAGTTTCTTTTCACCTCATCTCGCATTTGAAAATTTTTCAGAGGCACCGAAAAAAAAGAAAAAGAAATAAAAAAGGACTTGTGTATAAGATCGCTAGATCAATAAAAAGCAATCTGGTAGATTTATGGGACTCCGAAA
PRP18	YGR006W.line.47.chrVII.506070.506825_tile_1	YGR006W.line.47.chrVII.506070.506825_tile_1	Saccharomyces cerevisiae	R64-2-1	chrVII	505966	506392	+	AGAGAATCGACCTTTGGAAAGGGCCCCAATGGAAAGAACTTCAATGTTTTTTCCTCTACAAGTAATAAGAGCATAAAATGGACCTAGATCTAGCCAGTATCTTAAAAGGTGAAATTTCTAAGAAGAAGAAAGAGCTGGCCAACTCTAAAGGTGTTCAGCCACCATGCACTGAGAAATTCCAGCCACATGAATCCGCAAACATAGACGAAACACCGCGACAGGTAGAACAAGAAAGTACAGATGAAGAAAACCTGTCAGACAATCAGAGTGACGATATTAGGACCACCATTAGCAAATTAGAAAATCGGCCAGAAAGGATACAAGAAGCGATAGCTCAAGACAAAACCATCTCTGTAATCATTGATCCATCACA
PRP18	YGR006W.line.47.chrVII.506070.506825_tile_2	YGR006W.line.47.chrVII.506070.506825_tile_2	Saccharomyces cerevisiae	R64-2-1	chrVII	506338	506764	-	TCAATCATTATGTTAGCAGCATTCCGGCCTCCTTGAATTTTCGAATGTGCACTACGAGCATGAATGCCTACGCTAGTAACACCAATAGGCCAGGCCACATTGCCGATACTGAGTTTCATATAGGACTGAACGGCTAAATTTATTTCTTTAGGTTGTTGTAAATGATAGAGAACGGTCGCAAGGGAAATAAGTAAATCCGGGGCAAGCTGGTTCCTTCGTAGTTGCAGTAGGAGTGGAAAGAGTGCTTTTTTAGTGTCTAAGAACAGCTCCGGATGATAAGCTTCCAAAGACGCCTTCCAACGAGATAATATTTCGTGAATATATAAATTACATTTCATTGACAAAAGAGGTTTTCCTTCAGTAGAACCAATTT
PRP18	YGR006W.line.47.chrVII.506070.506825_tile_3	YGR006W.line.47.chrVII.506070.506825_tile_3	Saccharomyces cerevisiae	R64-2-1	chrVII	506710	507110	+	ATGAAAGAACGCGATTATGGATTACCAGTATTAAAAGATTAATAACTTTTGAAGAATGGTATACCAGCAACCACGATAGCTTAGCCTAATTGTTGAACTATTGTTTTCGTTATCGCGTGGCACGATATCATGCGGCCAAAATAAGAAGCAAGAATGCAGATGTTGATAGCCTTTGTTCAATTTTCCAGAGACAAATGCTTTACAGGATCGGGACTTGAAATATACTGACTGGATGACGGTAAACTTAGATCCGGATAAAGTTTGGATAGACGGCTGCTTTGATTTCACACATCATGGGCATGCGGGAGCCATTTTGCAGGCTCGTCGAACAGTTTCAAAAGAAAATG
SNU71	YGR013W.line.48.chrVII.514554.516416_tile_1	YGR013W.line.48.chrVII.514554.516416_tile_1	Saccharomyces cerevisiae	R64-2-1	chrVII	514524	514924	+	AACATGAGGGATATTGTATTTGTATCACCGCAGCTGTATTTGTCATCACAGGAGGGTTGGAAAAGTGATTCTGCCAAAAGTGGGTTCATCCCTATCCTCAAAAATGATCTACAACGTTTTCAGGACTCATTAAAACATATAGTTGACGCCAGAAACAGCTTATCAGAGACACTGCTAAATAGCAACGATGATGGGAGTATACACAATTCTGACCAGAATACTGGTTTGAATAAAGACAAAGAGGCTTCAATAGCAGATAACAATAGTGCTAACAAGTGCGCCACAAGCTCTTCCCGTTACCAAGAGCTCAAACAATTTCTTCCCATTTCCTTAGACCAACAGATTCA
SNU71	YGR013W.line.48.chrVII.514554.516416_tile_2	YGR013W.line.48.chrVII.514554.516416_tile_2	Saccharomyces cerevisiae	R64-2-1	chrVII	514870	515272	-	TTTTCTGGCTTAACACTCGGTATAGTTCCTGTTCGGTCTTCGACATATTCTTTTGTGTTCAAATCCAAGTGTAACTCAATCTTGAAATCCTCATGTAGCTTTCTAATAAACGCGAATAAGGCTTTGCAGTAGTTCAGCGTATTAACAAATGCCTCATCTTCATCAACCTTACTGAATCTTATAAAAATGTCCTGGGTATCTAAAAACGAAGAAAAAGAAGACCAAGCTTCTACTTTCAATGCGGAATTGCTTTGAGTTTCAGTCAACGCTAAATTCAAACAGTGGTCTAGCAATGATTCTATCTGTCCGCGAGAAAATGATGAAGAGACACCTTGTAAAGATACTGTAT
SNU71	YGR013W.line.48.chrVII.514554.516416_tile_3	YGR013W.line.48.chrVII.514554.516416_tile_3	Saccharomyces cerevisiae	R64-2-1	chrVII	515218	515666	+	AGGCTAGCGAATTTTATTCTGTTTTCAAAAACATTGAAGATCAAACAGACGAAAGAAATTCAAAGAAAGAACAGTTGGATGACTCTTCCACACAATACAAAGTGGATACAAACACTTTAAGTGATTTGCCATCGGATGCTTTGGACCAATTGTGCAAGGATATAATAGAATTTAGGACAAAAGTTGTCAGTATAGAGAAAGAAAAAAAAATGAAAAGTACGTACGAGGAAAGTAGGCGTCAAAGACACCAAATGCAAAAAGTTTTTGATCAAATAAGGAAAAACCACTCAGGAGCCAAAGGGAGCGCCAATACAGAGGAGGAGGATACTAATATGGAAGATGAAGATGAGGAGGATGACACTGAAGACGACCTTGCCTTAGAGAAGAGAAAAGAA
SNU71	YGR013W.line.48.chrVII.514554.516416_tile_4	YGR013W.line.48.chrVII.514554.516416_tile_4	Saccharomyces cerevisiae	R64-2-1	chrVII	515612	516054	-	TCTCAGACACATTCTTGTCCGCGTTATAGTTCTCGCTCTTCACAGTGCCTTCAGGAAGGGTGATGGCGGCAGCCTTCCCTGCAGATATGGCCTTACCATCCGATAGTTGTATAGGCGCCAGTTCCTTTGCATTTCCATTTTTAGCTCTATCCTCTTCGTCCCTTCTTTCCTCTTGCTCCTTGAAAGATCTATGGTGGTCGTAATGAACGTCGTTGGCAAGGTGTAATAGCTCCTTCAAATATAATGAGCGATTTTTCTCCAAATGTTCCTCATAGTTTTCAGCACTCATGATATCAGCCCTAATGGATTTTATCTTAGGCTCTGTATTGGAATGTAATTGGTGTAACATATCCTCATATCTACGATTTGATTCTTCCAGGTCTCTTTCT
SNU71	YGR013W.line.48.chrVII.514554.516416_tile_5	YGR013W.line.48.chrVII.514554.516416_tile_5	Saccharomyces cerevisiae	R64-2-1	chrVII	516000	516408	+	AGCTCAGAACACGTCAAGATCAAATTCGACTTTAAGAAGGCTATTGATCACTCAGTTGAAAGCTCTAGCGAAGACGAGGGATACAGAGAGAGCGAGCTACCTCCAACAAAACCCTCCGAGAGAAGCGCGGCAGAGGACCGTTTGCCATTTACAGCAGATGAACTGAACATAAGACTAACTAATCTGAAGGAATCGCGCTACGTGGACGAACTGGTGCGTGAATTCCTCGGCGTCTACGAGGACGAGCTGGTGGAATACATTCTTGAGAACATCCGCGTGAACCAGAGCAAACAGGCCCTTTTAAATGAGCTAAGGGAGACTTTCGACGAGGACGGGGAAACGATAGCTGATAGAC
SNU71	YGR013W.line.48.chrVII.514554.516416_tile_6	YGR013W.line.48.chrVII.514554.516416_tile_6	Saccharomyces cerevisiae	R64-2-1	chrVII	516354	516786	-	ATTACTTCTGGAAAAAAAGAAAAAAATGGTAAAAAACAGGTAAGATTATTTTAGCAATATTATGGGGTCCCTTGGTGAGGTCGAATAGTTTTGGTAATCTATTATAAATGTAAAAATGCAGGAAATAAAGAACTTGGTACTATGGAAATGTATAAAAGTTATATATATCAGCACGAAGATGAGATAGTAAAAAAACACCCACTGGTGCTATTTTGATCTGGCAACGCCCGACGTGTCTAGCCACTTGCTGCAAAACGCCCCGAAACGGTAATTTGTTTTCGTGTCTTCGCCTGTTTCAGAGCGAGCCTTTCCCTTTTGGGACGCGCGCCAAGGCCCTTCTGTTTCAGGTCCCCAAGCGAAATTCTTTACGACTCCACAG
SMD1/PRP38	YGR074W.line.49.merged_with.YGR075C.line.50.chrVII.635712.636875_tile_1	YGR074W.line.49.merged_with.YGR075C.line.50.chrVII.635712.636875_tile_1	Saccharomyces cerevisiae	R64-2-1	chrVII	635682	636115	+	TATGAAGTTGGTTAACTTTTTAAAAAAGCTGCGCAATGAGCAGGTTACCATAGAACTAAAAAACGGTACCACCGTTTGGGGTACACTGCAGTCGGTATCACCACAAATGAATGCTATCTTAACTGACGTGAAGTTGACCCTACCACAACCCCGACTAAATAAATTGAACAGTAATGGTATTGCGATGGCTAGTCTGTACTTGACTGGAGGACAGCAACCTACTGCAAGTGACAACATAGCAAGTTTGCAATACATAAACATTAGAGGCAATACCATAAGACAGATAATCTTACCTGATTCCTTGAACCTGGATTCACTTTTGGTTGACCAAAAGCAACTTAATTCCCTAAGAAGATCGGGTCAAATTGCAAATGACCCC
SMD1/PRP38	YGR074W.line.49.merged_with.YGR075C.line.50.chrVII.635712.636875_tile_2	YGR074W.line.49.merged_with.YGR075C.line.50.chrVII.635712.636875_tile_2	Saccharomyces cerevisiae	R64-2-1	chrVII	636062	636506	-	TATTTGAATGGCAATAACAAAAACGATGATGATGAAAATGATTTGATAAAGTTATTTAAAGTACAATTATACAAATATTCACAGCATTATTTCAAACTAAAAAGTTTCCCACTACAAGTAGACTGCTTTGCTCACTCCTATAACGAAGAACTTTGTATAATACACATTGATGAATTAGTCGATTGGTTGGCCACACAGGACCATATCTGGGGTATTCCATTAGGGAAATGTCAATGGAATAAAATATACAACTCTGATGAAGAGAGTAGTTCTAGCGAAAGCGAAAGTAATGGTGACAGTGAAGATGACAACGACACCAGCAGCGAATCATAGACCTCTTCTTGGCCTTTTATTCGCTGGTGCACCAAAATCGCGCCTTCTCTTTTTGCTG
SMD1/PRP38	YGR074W.line.49.merged_with.YGR075C.line.50.chrVII.635712.636875_tile_3	YGR074W.line.49.merged_with.YGR075C.line.50.chrVII.635712.636875_tile_3	Saccharomyces cerevisiae	R64-2-1	chrVII	636452	636900	+	AATAATACTGTAACCGCGCATAAACCAGAAGCAAAGCAATAATATATTTCGAGTCAAAACCGTTCTCATTTTTTACATTCAATAAGAAGTTCAACTGCTGGAAATTCGGTCTGATTTCGATTAACTTCATTAAGATGCATTTAAACTCAATGCCACCGAGAACCATCATGTGTAAATGACCATTTTGACCTTTTATGGTACCAAATGCGCCAATCATAACTTTCAAAAGCTCTACCATTGTATTGCCTCTCAAAGATTCGTTGCTTAGATTTACTTTATAGTACATTGAATTATGAATTTTATCTCTTGTCAACCGAGGAATAACAAGTGACACTGACTGGTTATTCAGTTGTTTTGGAGAGATGTTAGACTCCACTTGAAATTCATTGACAGCC
SMD1/PRP38	YGR074W.line.49.merged_with.YGR075C.line.50.chrVII.635712.636875_tile_4	YGR074W.line.49.merged_with.YGR075C.line.50.chrVII.635712.636875_tile_4	Saccharomyces cerevisiae	R64-2-1	chrVII	636846	637262	-	TTAAACGAAAAGCTAAAAAAACGTGAAGAAGCTTTAAAGAAGGTAGATGAGTTGATTGCTTCCAAGAAGGGTTCGAAGTATGCCAAGAGAGTAGAAAAAATGAAAAAAAACCAAAGTATAGGCTGGTTCTGAAGAATAAGAGAGAAGATAACTATAGTTTAGAATAGTAAACCCTATGTGTACTGTTTTATGTTTTTAATGTCTAATCATGTAAATAATTTTGTGATATCAATAACGAACGTTCTGAACAAGAATTATGATAAAAAAAAGTAAAATCTAAAGCCATTACAACGCTATATTTTCAGTGGCAGTAAAAACGCAAGAACAAAAACAAAACGTGGGTAAAGAACAAGGACTACAATG
PRP31	YGR091W.line.51.chrVII.666341.667825_tile_1	YGR091W.line.51.chrVII.666341.667825_tile_1	Saccharomyces cerevisiae	R64-2-1	chrVII	666313	666747	+	TATGAGCTCTGAAGAGGACTATTTCGATGAGCTCGAATATGACCTTGCCGATGAAGTTAATGAGGAAAAAGAAGACATACAAACTAAAAAGCTCACTACGGTAAATTGTCAAACAGAAAAATTCAATCCATTCGAAATTCTTCCGGAAAGTATAGAATTATTCAGGACGTTGGCACTCATCAGTCCTGATAGGTTATCTCTATCAGAGACAGCACAGATTTTACCAAAAATTGTCGATTTAAAAAGAATCCTTCAACAACAAGAAATAGATTTCATTAAACTGTTACCGTTTTTTAACGAAATCATCCCCCTCATCAAGAGCAATATAAAATTAATGCACAATTTTCTAATCTCACTGTACAGTAGACGTTTTCCAGAACT
PRP31	YGR091W.line.51.chrVII.666341.667825_tile_2	YGR091W.line.51.chrVII.666341.667825_tile_2	Saccharomyces cerevisiae	R64-2-1	chrVII	666693	667141	-	GTTGCAACTGGGAATGCGACTGAACTCCAAAACCCCTCCAGCATGTGCTATTAATTGGGCTGCTATCTCCGGGCCTACCAAGAAACACACGTTAGGGGCAATTATTGATATCTTTGAGGCTATGTATTGACCTATATCTTCTTGTAGTTTCCATAAATTTTCCAATATGCTATTTGCTTCTAAAATTTGCGTCCTCGTTTTGATGTCCAATGGCTCTTTGTTTTTGAAAGACGTCTTCATGGACATTGTTAAAACGAGGATCTGCTCTCTGGTCAATTTTGCTTTATTTTCCAAGTGGAAAAATAGTTCATCACTTTCGTTTTTTGAATAATTTTCATTTTCCAGTATGCTTATCACTTTTGAGTATTGTAATGGTGATGGTATCAATGAAGATA
PRP31	YGR091W.line.51.chrVII.666341.667825_tile_3	YGR091W.line.51.chrVII.666341.667825_tile_3	Saccharomyces cerevisiae	R64-2-1	chrVII	667089	667497	+	CATTGCGTCCATTGGGAAGAATAAGCACCTCTCACATGAGTTACATACATTAGAGAGTGGAGTACGACAAGAAGGATATCTATTTGCTTCTGACATGATTCAGAAATTTCCCGTTTCTGTCCATAAACAAATGCTTAGGATGCTTTGTGCAAAAGTATCACTAGCCGCAAGAGTTGATGCTGGCCAGAAAAACGGTGATAGAAATACAGTTTTAGCTCATAAATGGAAAGCCGAACTATCGAAGAAAGCTAGAAAGCTATCAGAAGCCCCGAGCATTTCTGAAACGAAGGCTCTACCTATTCCGGAGGACCAACCCAAAAAGAAAAGAGCTGGGAGAAAATTTAGGAAGTACAAGGA
PRP31	YGR091W.line.51.chrVII.666341.667825_tile_4	YGR091W.line.51.chrVII.666341.667825_tile_4	Saccharomyces cerevisiae	R64-2-1	chrVII	667443	667843	-	ACCGGAAAACCAATTGGTCTCTTCTTCTGGGTTAGTATGCTGTTTCTTGTGCATTTGAACCATCTCTGGCGACAGATTCGGTTGCTCTGTATTATGACCCAAGGAGATTAGGAATTCGTCAGCTTGCTGATTAGCCTCAGAAATCCTGTGCTTCATTACCTTTGTTAGCTTGGCTTGATTACCAGCAGATCTTCTGGAACCTGATGTAGCTCCTACTGCTTGTTGTAAAGAAGTATTAGACATACCCAAACCAACTTCTTCACCATAGGAATCAAGAACAGTTTGTTCTTGCTTGCCAAATTCCATCCTATTTTGTAATTGTCTGACATGCGATAGTCTGAATTTTT
PRP31	YGR091W.line.51.chrVII.666341.667825_tile_5	YGR091W.line.51.chrVII.666341.667825_tile_5	Saccharomyces cerevisiae	R64-2-1	chrVII	667789	668234	+	TCATGGTTAGGGCTCTTCTACATACTTGATAATATTTAAAAAGATATTATATAGTAGTGACCGGCGAGAGCGTTTTCGCTCATAAATTTCGTAAAAAGCCAAACACCACACGCTGCAACCCAGATGCCCTTTTTAGGAAATGTAATTATTCAAAAAGTAAACAATGACATGTTTCATTCCTCAATCTAAATCATTCGAAGCTACCTTGATGTTGAAGCCCTCCGCTTGTTGTTTATTTAAAAATAAATACAAGGAGGCAATTCGTCCAAGTAAATTATTGTAAGATAGAAACCTTGCTAAAGATAGAAACTAATATACCAGAAAAATTCAAGCAACATCTACAGTATTCCTTGCTAAAGAAAAATTCTTTAATATGCTATCAAAATCAGAAAA
DRN1	YGR093W.line.52.chrVII.670388.671911_tile_1	YGR093W.line.52.chrVII.670388.671911_tile_1	Saccharomyces cerevisiae	R64-2-1	chrVII	670340	670768	+	CTTACATATAAAAATAGGATGACAAATGCAAAGATTTTAGTAGCTCATATAAGTGAAAGCGATGCCGATGAGGCTATCAGAAAGATCAAGAAAGTGAATGAAAAATCAGGGCCCTTTGATCTAATAATTATATTCAGTAACTCGTATGATGAAAATTTTGAGCTGAATACTGATGGGTTACCTCAACTAATACTACTATCGTGTGATAAGGCTAACAATTCGAAATCCAAAAAGATAAATGAAAATGTAACATTGCTGCATAATATGGGTACTTATAAATTAGCAAATGGAATCACTCTTTCATATTTTATTTATCCGGATGATACTCTTCAAGGGGAGAAAAAAAGCATACTGGACGAATTTGGCAAAAGT
DRN1	YGR093W.line.52.chrVII.670388.671911_tile_2	YGR093W.line.52.chrVII.670388.671911_tile_2	Saccharomyces cerevisiae	R64-2-1	chrVII	670714	671147	-	ATCGAACGAATTCTCTGTTTCTGTTTCTAGTGGCCTTTTATTGCTGTTTGTAACCACGCTATTATACGGGTTAGCTATCAAGTTGGGCGGTTCAGGTTCATCCTTTAGTTCGTTGTCCCCTATTGGCATATTGAATGCATAGGCCCATTTCTTTCCAGATCCATATTTTGGAATATTGAGGAACCTCGATAAGCGCTCTCTTTCCCACTGGAAAGGCTCTAATTCGTAAAAGTTTATTTCATCTGAAAAGGCAAAATGGTACCTTGCTTGTAACTTTTTCGCCAATTCATCAACAACTTCACTTCCAGACAACCTTCCACATCTCTCAGAGATCGAAAGGCCCCATTCTTTTGTAAGGAGAATGTCTACCTGATCCTCA
DRN1	YGR093W.line.52.chrVII.670388.671911_tile_3	YGR093W.line.52.chrVII.670388.671911_tile_3	Saccharomyces cerevisiae	R64-2-1	chrVII	671092	671536	+	TGGAGACAAACAGGTACTTGCTAATAGAGAAAAGAATGAAAATAAAAAAATTCGAACGATTTTGCCGTCAAGTTGTCATTTCTGCTTTTCAAATCCAAACCTCGAGGATCATATGATAATATCAATCGGCAAACTAGTGTATTTAACCACAGCGAAGGGACCTTTAAGTGTTCCTAAGGGTGATATGGATATCTCAGGCCATTGCCTCATTATTCCCATTGAACATATTCCGAAATTAGATCCAAGCAAGAACGCAGAGTTGACACAGAGTATTTTGGCTTATGAAGCTAGTCTTGTGAAGATGAACTACATAAAATTTGATATGTGCACGATTGTCTTCGAAATACAGTCTGAACGTTCTATTCATTTCCACAAACAAGTTATTCCCGTT
DRN1	YGR093W.line.52.chrVII.670388.671911_tile_4	YGR093W.line.52.chrVII.670388.671911_tile_4	Saccharomyces cerevisiae	R64-2-1	chrVII	671482	671888	-	TTTCAGCCTCTATAGTCTCTTGTTGCTTAGTTTGTAAACAGGTTGAAGAATTCCATTTCACCCTGCGTGGCAAGTTAAGTAAAAAGGCTAGTACACGTCGTCCAAACTGCAGATCTATTGTCTCACTGGCATTAAATGTGGCCAAATATATCTTTGGGTCCGCTTCAGGAGTCTCGTAGACGGTAAATTGTAAATAATTATTGGATTGGTTGTTAATTACATCCACATATTGTTTGGAAGAGTGTGAATCGTAACATTGGAACTCTAGCTTAGCATTTCTTGTGAATTTTTCGTTATTGAAATGAACCTGTCTATCTAAGGCACTGCAGAACTTTAGAACGAGGTATTTTGGA
DRN1	YGR093W.line.52.chrVII.670388.671911_tile_5	YGR093W.line.52.chrVII.670388.671911_tile_5	Saccharomyces cerevisiae	R64-2-1	chrVII	671834	672252	+	AAGTTTCAAAAGGCCTACAGGACCTATGACATTTCTCTCACAGAAAACTAAACTAAAACTATTTCATTTAGAATTTCAAATATATCCAAATATATGTATATATATGTAGAATACTAAGTCATGCTACCTCTGAACGTTTAAGAGACCTAGCAACTCAGAGGTGATGAATTAAAAGAAAAACCGGGTAAAGTTCTTCGAGAGACCGCGCTGAAAAAATTTTTTTAGAAGAGTCACCCATACAGCCTACTGGTGTTCTCTGTGTGTGCTACCACTGGCTGTCATCGTTGTTGTATGTCCTTCAGATTTATGGAATTACTTAGATGGTATGAATAAGTGGTTAAACACATTATCTAAGACATTCACTT
SYF2	YGR129W.line.53.chrVII.750400.751047_tile_1	YGR129W.line.53.chrVII.750400.751047_tile_1	Saccharomyces cerevisiae	R64-2-1	chrVII	750370	750798	+	AATGGATTTTTACAAATTAGACGAGAAGCTGAAGGAGTTGAAAAGGAAAAGAGTAGATGTATCTATAAAGAGTAGGAAGTTGGCTGACAGAGAGATTCAGGAAGTAAGCGCAAATCGAAAACCAAGAGTATACAGTATGGAAGACGTAAATGATGCAGATGAATCAGTAGGAGATACAGAAAGTCCTGAAAAAGAGAAAGCATTTCATTACACTGTCCAAGAATATGATGCGTGGGAACGTAGGCATCCTCAAGGGAAGACTGGGCAAAGCCAAAGAGGTGGAATTTCCTATGATCAACTTGCAAAATTGAGTTATGAGAAGACCTTGCGGAATCTCGCTACGCAAACACAGAATTCGAGCAAACAGGATAGT
SYF2	YGR129W.line.53.chrVII.750400.751047_tile_2	YGR129W.line.53.chrVII.750400.751047_tile_2	Saccharomyces cerevisiae	R64-2-1	chrVII	750744	751184	-	GCACTTTTGCGGGCATTTAACCTCAGCTCGTCACGTGACGGTCGATGAAAAATCCAGGGTATTAAAACTTTCCTTTGGTTATATCGGTATATTCTAAATAAAAGAGAAGCTTATTCTGATCCTTTTGATTCCCTGCTCAATTTTTCATTGAATTGTTTATTTTTGTCATTAATGAAGCTTTCAACCCCATACAGTGTTTTTGCATTTTGCATTTGTCTTTTTCTTGCTTCGTATCTTTTTTTCGACTCAGATTGCAAAGAAACGGCCAACTTATTAACTAGCTTGTCGTCATCTGCAATTGTTATCTTACCCGTCTTAGTGTCCTTCTGTACCTTGCCGATTCTACCCTTCTTGGGTACGTTTTTATTGTCTTCTTCATCGGCGGAA
U5	snR7-L.line.54.chrVII.939459.939672_tile_1	snR7-L.line.54.chrVII.939459.939672_tile_1	Saccharomyces cerevisiae	R64-2-1	chrVII	939413	939841	+	TAAAATAGAAAAGATAAACGCCCTCCTTACTCATTGAGAAAAAGGGCAGAAAAGTTCCAAAAAATATGGCAAGCCCACAGTAACGGACAGCTTTACCTGTTTCTATGGAGACAACACCCGGATGGTTCTGGTAAAAGGCAAGAACCATGTTCGTTATAAGTTCTATAGGCAATAAAAGGCCCACAGTTCTTGATGTTGACCTCCCTCCGCCATTGATCTGTAAAGCTGCTTGCAGGTTTTAAAACAAAAAGAAAGAAAAGTATTTTAAAATATATAGGAGGAAAGAAACATTTAACAAAAAGTCTTACTATGCGCTTTTTATACTGAGCACTCCGTTTCTACAAAATTTTCAATTTTTTTTTTCATATTCGTT
CWC22	YGR278W.line.55.chrVII.1046731.1048464_tile_1	YGR278W.line.55.chrVII.1046731.1048464_tile_1	Saccharomyces cerevisiae	R64-2-1	chrVII	1046699	1047137	+	AGCATGTCTACCGCTACCATACAGGATGAAGACATTAAATTTCAGAGAGAAAACTGGGAAATGATAAGGTCACACGTTTCACCCATAATATCCAATTTAACAATGGACAACTTACAGGAATCGCACAGAGACTTATTTCAAGTCAATATACTTATTGGCCGCAACATAATTTGTAAAAATGTTGTGGATTTTACTCTGAACAAACAGAATGGCAGGCTAATCCCTGCTTTATCCGCTTTGATTGCCTTGCTAAATTCTGATATTCCAGATATTGGAGAAACTTTAGCAAAAGAACTAATGTTAATGTTCGTGCAGCAATTCAATCGCAAAGATTACGTGTCCTGCGGAAATATCCTTCAATGTCTGTCCATTTTATTTCTT
CWC22	YGR278W.line.55.chrVII.1046731.1048464_tile_2	YGR278W.line.55.chrVII.1046731.1048464_tile_2	Saccharomyces cerevisiae	R64-2-1	chrVII	1047081	1047524	-	ATCAAACGCCATGGTTAGTTCATTGAAATTTTCACACTTTTCAAAATTTCCCAGTTCTTTGTTGGCTTCATCCTCATCACTAACAATATAGGAGTGCGTATGAACTGTGTAACTAGTTGGGTCCAATATAAACAGACCTTGAGACCCAGATTTATAATCTTTTTGCCTTATTTCAAACAGAGTCTCTAACGACTCACGTAGTGTACTAGATAACTCCTGTGTTTGCAAAATATATCTTAACTTCTCCCAAATCATATCATGGGTTTTCTTACTGACAAGTGCAAGTTTCCAGCCACATATTTTCATCACGGCAATGACCAGTCGTAAAGAATTCTTTTCAAGGAGTAGCAATAGAATCTGTAAGATCACGATTTCATGAATTACATCATAA
CWC22	YGR278W.line.55.chrVII.1046731.1048464_tile_3	YGR278W.line.55.chrVII.1046731.1048464_tile_3	Saccharomyces cerevisiae	R64-2-1	chrVII	1047471	1047905	+	TACGCTACGACAGAAGCTGCTGATAAATAATACGTCCGACACAAATGAAGGTAGTAACAGTCAATTACAAATCTATGACATGACATCTACCAATGATGTCGAGTTTAAAAAGAAGATTTATTTGGTTCTGAAAAGTTCATTATCAGGTGACGAAGCGGCTCACAAATTGCTAAAATTAAAGATTGCGAACAATTTGAAAAAAAGCGTGGTAGATATAATCATCAAATCTAGTTTGCAGGAATCTACATTCTCTAAATTTTATTCTATTTTGTCCGAACGTATGATAACGTTCCACAGGAGTTGGCAGACAGCTTACAATGAAACTTTTGAGCAGAATTATACACAAGATATCGAAGATTATGAAACTGACCAACTGCGAAT
CWC22	YGR278W.line.55.chrVII.1046731.1048464_tile_4	YGR278W.line.55.chrVII.1046731.1048464_tile_4	Saccharomyces cerevisiae	R64-2-1	chrVII	1047851	1048294	-	GACTCTCTGGCCTTCTTCCGTAACTTTTCAAGTTCCTCCTCTTCTCTCAATTTTTTTTCTTCTTCCTCTGCATCCTCAACTTCTTGAATAATTGTCAACCGGCTTCTCATGTCCTCTGTGAGCAGGCCCAATCCTATGGCAGTAAAGAAATTTATGGAGTATCTTATATGTTCGGCGTCTCCTTCCAGCGGAAACATTCCGTCAAGCTTGCTGGAGTTTAGCCTTAATTGCAGCTCATCTAATCCGAGCTCATTTACGAGCTCTTGAAATAAAAATTTGATGAAAATTCTTCCTTGAGGACACGATTCTTCCTCAGTTAACTTAATTATCTTAAGACAGTCCATTGGAAGAAATTCATAAGATATTAAGTGTCCCCAAAACTTACCTAAGA
CWC22	YGR278W.line.55.chrVII.1046731.1048464_tile_5	YGR278W.line.55.chrVII.1046731.1048464_tile_5	Saccharomyces cerevisiae	R64-2-1	chrVII	1048243	1048679	+	CACAACCAACCCAAGGGCCAAAAATTCACGAATCCAGGTTATTTTTACAGAAGGACACCAGAGAAAATAGTAGATCAAGATCGCCATTCACAGTGGAAACAAGAAAACGTGCTAGATCCAGAACTCCACCAAGAGGATCGAGAAACCATCGTAACAGATCCAGGACTCCGCCTGCAAGAAGGCAACGGCATAGATGAAGAGCCCGGCCAAACAAACATTACACATGTAATCGTACATATTTACATAGAACCGTACACGCTTTTAGCCAAAAAAAAAAGAAAGGTAGAATATAAAATAAAAACTCGTATTTCGTATTAAGACAAATATACAGAAATACAAATGAGATCATAAACGAACTAAAATAGGAAAATGAAAAAAAAAAAAA
NAM8	YHR086W.line.56.chrVIII.278153.279724_tile_1	YHR086W.line.56.chrVIII.278153.279724_tile_1	Saccharomyces cerevisiae	R64-2-1	chrVIII	278125	278555	+	AATGTCCTATAAACAAACAACATATTATCCTAGCAGGGGTAATCTGGTAAGAAACGACTCATCTCCGTACACTAATACTATTTCCTCAGAAACCAACAATAGCAGTACAAGCGTATTGAGTCTTCAAGGCGCATCTAACGTGAGTTTAGGGACCACTGGTAACCAATTGTACATGGGCGACTTGGATCCTACATGGGATAAGAATACCGTTAGGCAAATTTGGGCATCTCTGGGAGAAGCGAATATTAATGTCCGGATGATGTGGAATAATACGCTTAATAATGGGTCGAGATCATCAATGGGTCCAAAGAATAATCAAGGATATTGCTTTGTTGATTTTCCCTCATCTACTCATGCAGCAAATGCACTTTTAAAGA
NAM8	YHR086W.line.56.chrVIII.278153.279724_tile_2	YHR086W.line.56.chrVIII.278153.279724_tile_2	Saccharomyces cerevisiae	R64-2-1	chrVIII	278501	278910	-	GCTGACCAGATGTGGGTCCTACTTTTATGGCTCTACCATTTAAAAATACGCCTTGCATTTCTGACAGAGCTAACTGTTGTTCATCAGAATTGGTAAACTTTACAAAACCGTAGCCCTTAGACATCCCGGTAACCTGGTCGTGCACAATTTTGGCATGAGAAGTAGAAGCATATCTGTTAATGAAAAGTTCAAATAATTGAGACTCTGTAACATTTGGTGCTAAGTCTCCAACAAATATAGAACAGTTGTTACCACTCTTCACGTTGTTAAGAGAATTGTTGCTGTTTGAATATGAGGATGTAGCCCAGTTTAATTTCAATTTTTTATTTGGAAAATTGGGTATAAGCATACCATT
NAM8	YHR086W.line.56.chrVIII.278153.279724_tile_3	YHR086W.line.56.chrVIII.278153.279724_tile_3	Saccharomyces cerevisiae	R64-2-1	chrVIII	278855	279300	+	CAGCAGCATGTCAGCGGTAACAACGATTACAACCGTAGTTCTTCGTCACTAAACAACGAAAATGTAGACTCGAGATTTCTTTCCAAGGGTCAATCATTTTTAAGCAATGGAAATAATAACATGGGCTTTAAGAGAAACCATATGTCTCAATTCATTTATCCAGTCCAACAGCAGCCGTCTTTAAACCACTTCACTGATCCGAATAACACCACTGTGTTTATCGGAGGATTGTCATCACTGGTGACTGAAGACGAATTACGTGCTTATTTCCAACCTTTTGGCACGATAGTCTATGTCAAAATTCCGGTAGGCAAATGTTGCGGGTTTGTCCAGTATGTTGATCGGCTATCGGCTGAGGCTGCCATTGCTGGGATGCAAGGGTTCCCCATTG
NAM8	YHR086W.line.56.chrVIII.278153.279724_tile_4	YHR086W.line.56.chrVIII.278153.279724_tile_4	Saccharomyces cerevisiae	R64-2-1	chrVIII	279245	279681	-	GCTTCGCTTCCTTGCATGATAACTTGTTGGCCACCCGTGCCTGAGAGGTCCATAGAGCTAGTGTCAGCCAGTAAACTAGTAGCTTGCGTATTTGTAGCATTATTATTACTGTAGAAACTGAAATTGTTCGAGCCTAATCCATTCGCATTAGCGTATGGATTAGAATAATTCAGAATTTGACATCCAGGAAGCATCGTGGATGAAACATTATTATCTGGCAGAACAGGTGCTTCACACGTACTGGATGGAATGTATCCGTAGTTAGGTTGCTGTAAACCTGGTTGCTGTTGTTGAACCTGTAAAGAGTTACTTAACATGGCTTGCTGAAGCAACGCTGTTTGCTTAGCAGACCTGCCCCAAGACAGTCTAACTCTTGAATTTGC
NAM8	YHR086W.line.56.chrVIII.278153.279724_tile_5	YHR086W.line.56.chrVIII.278153.279724_tile_5	Saccharomyces cerevisiae	R64-2-1	chrVIII	279627	280063	+	CGGTTGTTAACAGCACTAATGCAATGTTAAACCGTTTGGAACAAGGCAGTAATGGTTTTATGTTTGCTTGAGCCACACGTGTATATAAAAATGTTTGTTTTCCTTTTGGCCCTTTTTCTTTCTTGGTATTTTCTTTACTTCAGTGTTAAATTGTATTTGGTCTTAGGCTGACGGTGATATAACAGCGCTTTATTTTCTTTTTTTCATTGCTTTTTATCGTTTTCAAGATTCCATGTCCTTTTATTAAGTCTTTTTTGTATCGTTATAGTTGCGTTTTTCCTTTTGATTTTCATTTCTTTCAAGGTTATTGTTATTCTTAATTCAATTCAAGATTGTACGCTTTTAAGCATGTTTATGATTTTCCTTTATTACTTCCATTTACC
LSM12	YHR121W.line.57.chrVIII.352756.353319_tile_1	YHR121W.line.57.chrVIII.352756.353319_tile_1	Saccharomyces cerevisiae	R64-2-1	chrVIII	352724	353138	+	TCCATGAGTGTCAGCCTTGAGCAAACGCTCGGATTCAGAATAAAAGTTACGAACGTGTTGGATGTAGTTACTGAAGGAAGATTGTATTCGTTCAATTCATCCAACAACACTCTTACTATCCAAACAACAAAGAAGAATCAATCTCCACAAAACTTCAAGGTGATAAAATGTACATTCATCAAGCATTTGGAAGTCATTGGTGATAAGCCCTCGTTTAACTCATTCAAAAAGCAACAAATCAAACCCTCATATGTCAACGTGGAAAGAGTTGAGAAGCTTTTGAAAGAAAGTGTAATAGCATCTAAAAAGAAAGAACTCTTAAGGGGCAAGGGTGTGAGTGCAGAGGGTCAGTTCATTTT
LSM12	YHR121W.line.57.chrVIII.352756.353319_tile_2	YHR121W.line.57.chrVIII.352756.353319_tile_2	Saccharomyces cerevisiae	R64-2-1	chrVIII	353084	353498	-	CATTGCGACTGAGAAGAGAGTGGTGGAATATTATAGTTTGATAAATAGAAAAATCTGTAGACTCAAATGGATCTCTTTATAAACAATAGTTGACATTATAGAAGTACGGATAAAATATATAACGTATATTATCGTTTCCGTCATTAATTAATCTATCCACCTTTCCTACCATCGTCTTGTTCTAGCTGCTCCCAGCTTCTTTCCACTATTCTTTGAATTAATGTAATGGATTGGTTACTTCCCTCATGTAGCACTTTGATATCTTCGACCTTGTATGGAGGTTGCACCTTAACGTCATCAAGAATAATGATGTCTTTAGCCACCCACTTAGTATCTCCTATGGTCTTGAAGATTTGATCGA
LIN1	YHR156C.line.58.chrVIII.411384.412406_tile_1	YHR156C.line.58.chrVIII.411384.412406_tile_1	Saccharomyces cerevisiae	R64-2-1	chrVIII	411350	411789	+	ATATCTTACATGAAACTTAAACACGATACATGTATCCAGTTTTCATCTCGATCTGGTTCGCTGTGAAATTTTACTATAACACTGTTTTTGAAGTAGGATTTTTGCCAATAAGACATTTCATAGTTCGTGTACAGGCCGTGATATTCATCTAATTTGTTCAACCACTTGAAGCCCCATAACTTTGTTTTATGGTTAACTATTCTGGAGGAGTCATCGAAAATTTCCTCTTCTATAGCATCCTGAACTTTTAAGCGGTTATATTCATATACTTCACTGAATCCCTTTTTTTCTAGTATATTGATCAAATCAGATAATAGCTCGATTCCGTGAATAACATATTTCAATGATTTGTTCTTTTTTGAAATGGCAATTTTTCGCAGCTTGT
LIN1	YHR156C.line.58.chrVIII.411384.412406_tile_2	YHR156C.line.58.chrVIII.411384.412406_tile_2	Saccharomyces cerevisiae	R64-2-1	chrVIII	411736	412166	-	ATTCAGCTTTTGGATATTGCAGAGTTCAAGAAAGAAAACTTAGCCGACTTAGATTATCAGATCGGTAATTCAGAGAGCAAGGTAGAAAAAGGTGTGAATATAGAGCCATTTAATATAGATGACGAAATAAAACATGGGGTATTCGATAAAGATGGGAATTATATTAAGACAGAAAACGCCACAGAAAATGATCAACAAGATAATGAGGAATGGATGAATGATGTCATAAATACAGAGGAGGTAAATCGCTTAGAAAAGGAACAAAGTGTCAAAACGCAGAATTCGAGACATTATATGGTCCACGAAGCATTAAATCTTTTGAAATTTTTTCTTGTTGATGAGAATGAAACAGTACTGGAATCCTTGGGCAGGTTAAA
LIN1	YHR156C.line.58.chrVIII.411384.412406_tile_3	YHR156C.line.58.chrVIII.411384.412406_tile_3	Saccharomyces cerevisiae	R64-2-1	chrVIII	412112	412528	+	TTTTCGATTTCTTTCGCTTTCTATGGTCTTCGACGTGATCTTCATTTTTTTCATAGGATTTTTCATCCATTTCTTTCCCACTATTTTCATTATCTGTAGAATCTTCAACGCTAGAATCAGAATCAGAATCATATTCTGCCCTGCTTAGCTCTTCATCTTCATATATCGTACTTTGATTATGTAACTCATCGCTAAGCTTTTCGTCGTGTTCACGTCGATCACTATTTCTTTTCAGTTTTGAGCTGTTCGGGTATTGCGTATATTTCATATCCTTCTACAAACAATATGGTGCACTTGAGTGTTTTTATCAAAGTTTTCCCTTGTTCTTTAAAAGGCAGCTTAGCATGGTCATTCCAATTTGTT
PRP8	YHR165C.line.59.chrVIII.429707.436948_tile_1	YHR165C.line.59.chrVIII.429707.436948_tile_1	Saccharomyces cerevisiae	R64-2-1	chrVIII	429677	430097	+	ATTCAGCTAAATACATCGATTTGTTCGGCCTCTAACTCTTCGTCCCCCGCCAATTCGCTAAACTGTAAAAAGTGTACTGGACGATGCATCTCATTATAGAATTCCAAAGGAATGCCGTATTTAAAATTGTAGTCACCTTCTTGGTTAAATGCTGTTCCCATAAATGTGTAGTTCCAAACGTTTCCAGATGGAATTATAAAATTACCTGTGATACGGTCAGAGAGAAGTAATTGGGCATGCGTGCTGAAAGTAGGCTCAAACCCTTCCGATAGCACGTTCATTATATCCTTATTTTCTTCACCCCATTGGTAACCTTCGTCGGTCAGGTTATAAGCGCTTAATGATACTGATCCCGGGGTGGAAA
PRP8	YHR165C.line.59.chrVIII.429707.436948_tile_2	YHR165C.line.59.chrVIII.429707.436948_tile_2	Saccharomyces cerevisiae	R64-2-1	chrVIII	430041	430445	-	GGAGGAACAGAATGTTTACGTCCTTCCAAAAAATTTATTAAAGAAGTTTATTGAGATATCCGATGTGAAAATCCAGGTGGCGGCCTTTATTTATGGTATGTCAGCAAAAGATCATCCGAAGGTGAAAGAAATCAAGACTGTTGTGCTGGTACCTCAATTAGGCCACGTAGGATCCGTTCAGATAAGCAACATCCCTGACATCGGAGACCTTCCGGATACTGAAGGCCTTGAACTACTCGGTTGGATCCATACCCAGACAGAAGAACTTAAATTCATGGCTGCGTCTGAAGTAGCAACTCATTCTAAACTTTTTGCGGATAAGAAAAGAGACTGCATTGATATTTCAATTTT
PRP8	YHR165C.line.59.chrVIII.429707.436948_tile_3	YHR165C.line.59.chrVIII.429707.436948_tile_3	Saccharomyces cerevisiae	R64-2-1	chrVIII	430391	430806	+	CACGAAATCATCAGCCGAAACATAAATGTTTTTTAACCTCAAATATAATAGTGTATTAGCAATTGCAGATTTTCTCCATTCATTCTTTGAACTAAACGTTTGACTTTCGTAATCAGCGGAAGCTACTACAACTATCTCCTCACCTTGCGCATTGATAGTTTTAGTTTTCATAACAGTTGATGCACCTGCAGCTTCTTCGTCGTTCTGCTTTTCTGACCTGGCAGCTTCTAATTCAGCCATTTTTTGTCTCTTCACAGATGGTGCCTTGATATTTTGACCCAATATAATATCTTTAATTTCCGTTTGAGTTAAGGCAGATATATTGACATTGTATTTTCTGCCGTACTCAGTCAAAATCAAA
PRP8	YHR165C.line.59.chrVIII.429707.436948_tile_4	YHR165C.line.59.chrVIII.429707.436948_tile_4	Saccharomyces cerevisiae	R64-2-1	chrVIII	430751	431157	-	TGCTTGATCCTTTAGAGGTTCACATGCTTGACTTTCCTAACATAGCAATCAGGCCAACAGAGCTGCGACTACCATTTTCAGCTGCAATGTCAATAGATAAACTTTCTGATGTTGTGATGAAAGCTACTGAACCTCAGATGGTTCTGTTTAACATTTATGATGATTGGTTAGACCGTATTTCATCGTACACTGCATTTTCTAGACTTACACTACTTTTAAGAGCTTTAAAGACGAACGAGGAAAGTGCCAAAATGATTCTACTCAGTGACCCCACGATCACTATCAAATCGTACCATTTATGGCCTTCATTCACTGATGAACAATGGATCACTATCGAATCTCAAATGAGAGAT
PRP8	YHR165C.line.59.chrVIII.429707.436948_tile_5	YHR165C.line.59.chrVIII.429707.436948_tile_5	Saccharomyces cerevisiae	R64-2-1	chrVIII	431103	431507	+	ATTGCCTTTCTTGTGACGATAATTTGTTTTGGCTGCTCTTCTTTGGGCAAAGATCTCACAAGAGCACTAACTTCCTCAGCTGTTTTCCATTTGGCCAATTGGCTTAAACGTTTTTGACCGGCCCATACAGAGGTATGGATAATTTTCAGAAACAGATGCCCAGTCTTTGGATTTAAAGTGAAAATGCAACCATTAATTGCTTTTGTAGCAACGTTCCCTTCAAAAGTCTTGTGGACAGTAACTCTATACACATTAGTGTCGTCAACGAAGAGTTTAATGTCGTTATTGAATAACTCGGCATAGTTTGAGGAGTTTAAAAATGGTTCCTGTACACTAGATTGATATATTTGA
PRP8	YHR165C.line.59.chrVIII.429707.436948_tile_6	YHR165C.line.59.chrVIII.429707.436948_tile_6	Saccharomyces cerevisiae	R64-2-1	chrVIII	431451	431856	-	TGAATGGGAAGTTTCAAAACCCTCCCTATTACATGAAACAAATGACTCATTTAAGGGATTGATTACCAACAAAATGTGGTTTGATGTACAATTGAGATACGGTGATTATGATTCTCATGATATATCTCGTTATGTGAGGGCAAAATTCCTCGATTATACAACAGATAATGTCAGCATGTATCCCTCCCCAACAGGTGTTATGATCGGTATCGATTTGGCTTATAACATGTATGATGCCTATGGTAATTGGTTCAACGGATTAAAACCTTTGATACAAAATAGTATGAGAACAATTATGAAAGCTAACCCAGCATTATATGTCCTTCGTGAACGTATTAGAAAAGGTCTT
PRP8	YHR165C.line.59.chrVIII.429707.436948_tile_7	YHR165C.line.59.chrVIII.429707.436948_tile_7	Saccharomyces cerevisiae	R64-2-1	chrVIII	431801	432213	+	ATGAACACTTTCCATAGTTATGTCAGCGGCAGATGAATTCATCTTGTACGATTTGCGGGGATGCACTGTTTCTTTAGTCACAGATTCAATTTGCAAAACATCTAGCTCACCATCGAGAATTTGACAAATATCAAAAACTATACTTTCATGTATTTTTTGCCACAAATGAGCACGGAATATTTGAATTAAAGATATTTTTAACGTAGGAATTTTACCATGGAGGAAGATACCAGTCAGATCCAATTGCACCAAGAAACCGACATAGACATTTGCTCTGTTAATAGTTGGTGACCACCATAAGGTAAATCTACGATTTGGAATTTGGCTTAAACCAGTTCTTTGAGCATGAGTTAGCTTCT
PRP8	YHR165C.line.59.chrVIII.429707.436948_tile_8	YHR165C.line.59.chrVIII.429707.436948_tile_8	Saccharomyces cerevisiae	R64-2-1	chrVIII	432159	432566	-	AGCAGAATAGGAGGTTAGCTTTTGAAGAACTTGAAGGATCGTGGGATCGTGGTATACCTCGTATTAGCACTTTATTTCAAAGAGATCGACATACTCTAGCGTATGACAGAGGTCACAGAATCCGTAGGGAATTTAAACAGTACTCTCTAGAGAGAAACAGCCCCTTTTGGTGGACAAACTCCCACCATGACGGTAAATTATGGAATTTAAATGCCTATAGAACTGATGTGATTCAAGCCCTAGGAGGTATTGAAACAATTTTGGAACACACTTTATTTAAGGGGACTGGTTTTAATTCATGGGAAGGTTTGTTTTGGGAAAAGGCGTCCGGGTTTGAGGATTCCATGCAATTTAA
PRP8	YHR165C.line.59.chrVIII.429707.436948_tile_9	YHR165C.line.59.chrVIII.429707.436948_tile_9	Saccharomyces cerevisiae	R64-2-1	chrVIII	432513	432955	+	TGAATAGCTTCCTGCCTTTTCGTTGCATACTCGGCCCACACCCTTTGAGAGTCTAAAAATTCATTTTCCCAAGTAGTGATGTAACGGAAGATAGTTGGGATTAATTTTTCATCCTCGTGCGTCATACCAGCACGAAAATGCGTAATTCCAGTATCGGTCTGTTTTGACCAACTTAAGTCAGATGCAGGAATTAAAATATGAGAAGCACTAATCATACCCAACCCACCAAGTTCTTTTGGTGTATAAAAAACAGCAGGTGGAAATCTTGTTGGCATTTTCGAATTTAAACCAAGTTTGACACGGTTTTGAATTCTTGTTTCTCCTTTCACCAGGATATCTAATAACGGCTCCGTGGCAACAATGGCTTCTCTAAAGTATGTGAAAAGGGA
PRP8	YHR165C.line.59.chrVIII.429707.436948_tile_10	YHR165C.line.59.chrVIII.429707.436948_tile_10	Saccharomyces cerevisiae	R64-2-1	chrVIII	432901	433307	-	GCGAGCAGTGTTTTGGGAAATTCAAAGTAGGGTGCCAACTTCGTTAACGTCAATTAAATGGGAAAATGCTTTTGTTTCCGTATACAGTAAAAACAATCCGAACTTACTCTTCTCTATGTGTGGTTTTGAAGTCAGAATATTACCAAGACAAAGAATGGAAGAGGTGGTTTCTAACGATGAAGGTGTTTGGGATTTAGTTGACGAAAGAACCAAGCAAAGAACTGCAAAAGCATATTTAAAGGTATCTGAAGAAGAAATCAAAAAATTTGACAGCAGAATAAGAGGCATATTGATGGCCTCCGGTTCAACCACTTTTACTAAAGTGGCCGCTAAATGGAACACTTCACTGATAT
PRP8	YHR165C.line.59.chrVIII.429707.436948_tile_11	YHR165C.line.59.chrVIII.429707.436948_tile_11	Saccharomyces cerevisiae	R64-2-1	chrVIII	433253	433664	+	CCCTAGGTTAACGTCCTGACGTATTAGCCTCATGCGCGAATCTTTGGGCCAGCATTTTCTATTATTGTATCCGATGCTGTTTTCAAAGTTTGGATCTGGATTCTCTGCCAAGTATTCATCAGTCAATTCCTCTCCCTCATCTTCTTCAAAGTGAAAAAGCATATATATACGATCTAAATATCTGGTGTAAAGTCTGATCGGATGTGCCTTTTCTACTTCTTTGCTCTTGAATTGCATAAATTCATTTGGATTGTTAGCTGGACCAGCCAAATCTGTAGCCCTTTCCTGACCCAATAGTAAAAGATCTATAACTAGTCCGTAATATTGGAATATGAAAGAAGCGAACTTCAACCCGCG
PRP8	YHR165C.line.59.chrVIII.429707.436948_tile_12	YHR165C.line.59.chrVIII.429707.436948_tile_12	Saccharomyces cerevisiae	R64-2-1	chrVIII	433609	434012	-	AAGATTACCGATGCATATCTTGATCAGTATTTATGGTACGAAGCTGACCAACGAAAGCTTTTCCCAAACTGGATTAAACCAAGTGATTCAGAGATACCACCTCTTCTGGTATACAAGTGGACTCAGGGTATAAACAACCTATCTGAAATTTGGGATGTATCCAGAGGCCAATCTGCAGTTTTGCTTGAGACTACTTTGGGTGAAATGGCCGAAAAAATTGACTTTACTTTACTTAATAGATTACTTCGCCTGATTGTAGATCCTAATATTGCTGACTATATCACTGCAAAAAATAATGTTGTTATCAACTTTAAAGATATGAGTCACGTCAACAAATATGGCTTAATAC
PRP8	YHR165C.line.59.chrVIII.429707.436948_tile_13	YHR165C.line.59.chrVIII.429707.436948_tile_13	Saccharomyces cerevisiae	R64-2-1	chrVIII	433957	434359	+	TTTCCAAGGGATCAACTGAATAAACAGGGGAAATGTTTTGATAGTTTTCCATCATGGTTATATCAACAGGCTTAAAAACTCGCTGGGTCAACAAGTACTTTTTGATTCTGTTCAAAGTATCGTGAGGATTATCATAAGCCTCCTCTATCAACGCAAGTTCTTCCCTTTCAGATGCATTTAAACGTACTTTTGATGCGTAGACATCTTTTAGGTCTTCGAGGGCAAGAACTAATATCTTAGTATCATTTTTGTAAGTTAAAGGTGGAAATGGTATTGGTGAAAAGCTCCTTGATTCAAGCCACTCAACCATAACAGAAAATATGGTCGTAGCCTCTTCGGGAGTAATTTC
PRP8	YHR165C.line.59.chrVIII.429707.436948_tile_14	YHR165C.line.59.chrVIII.429707.436948_tile_14	Saccharomyces cerevisiae	R64-2-1	chrVIII	434305	434719	-	TACTACGATCTTGAGTTACGAAACTCGGTCATGGATGACATTTTAGAAATGATGCCTGAGAGTATTCGACAGAAAAAGGCAAGAACTATACTGCAACATTTAAGTGAGGCTTGGAGATGTTGGAAGGCTAATATTCCATGGGATGTTCCTGGTATGCCAGCCCCAATCAAAAAAATAATTGAACGGTATATAAAATCCAAAGCTGATGCCTGGGTATCTGCAGCTCATTACAATCGAGAACGTATAAAGCGTGGAGCTCACGTCGAAAAGACTATGGTTAAAAAAAATCTGGGGCGTTTAACGAGACTTTGGATCAAAAATGAGCAGGAACGTCAAAGGCAAATACAGAAAAACGGTCCCG
PRP8	YHR165C.line.59.chrVIII.429707.436948_tile_15	YHR165C.line.59.chrVIII.429707.436948_tile_15	Saccharomyces cerevisiae	R64-2-1	chrVIII	434665	435087	+	AGGCGTCAAGTCTTTGTTTAGTTGTAGTTTTGACAATTTCATTAGAACGGCCTTCAAATTGACGTGTGATAAGGTTTCCAATATATCTTTCGAGTAGTGGTATAGTGCCTCTTAAGAAATTTAGCCACACTCTCCACGCAGGTTGCCAAAATCCACAACCAGGTCCTTTTCCCAAATTTTTATTAAACTTATAATATATGATATGTTTCAGATCTTTACATGCGCGGATTTGATGCATTACTTTATATTTATAACGATAAATACCGGTCAATTGTCCTATGTGGTTCAAAATATAATGTATACCATCTGCTAACTGGAAGGCATCTACATTTCCTAACCTAAACTGCACATGTGTATCTACAATCAGTT
PRP8	YHR165C.line.59.chrVIII.429707.436948_tile_16	YHR165C.line.59.chrVIII.429707.436948_tile_16	Saccharomyces cerevisiae	R64-2-1	chrVIII	435033	435441	-	AGGAGTATCCCGTTAAAGTTAAGGTCTCTTACCAAAAGCTCTTGAAGAACTACGTGCTAAATGAATTGCACCCTACTTTGCCAACAAACCACAACAAAACTAAGTTATTGAAGAGTTTAAAAAATACCAAGTATTTTCAACAAACTACAATTGATTGGGTAGAGGCAGGACTCCAGCTATGTCGACAAGGACACAATATGTTAAATTTATTAATCCACAGAAAGGGCCTAACTTATTTACATCTCGACTACAATTTCAATTTAAAACCAACTAAAACCTTAACCACAAAAGAACGTAAAAAGTCAAGACTTGGAAACTCATTTCATTTGATGCGTGAATTGCTAAAAATGATGAA
PRP8	YHR165C.line.59.chrVIII.429707.436948_tile_17	YHR165C.line.59.chrVIII.429707.436948_tile_17	Saccharomyces cerevisiae	R64-2-1	chrVIII	435387	435792	+	TCGTCAGGATGTTGCAAAAACCATTTTTTAGCCAGGGCAACATCTTGTGCTCTCACCATTTTTCCTTTAGTTCTATTAAATGGAAAAGGTGAATGATATAACGACATCGCATCTTTTGTATTTGGCAAAATAAGTTCTTCTTCTTCAGCCAAAAGAGGTGCAAAATCTTCAGGTAAAGTGAAATCACCGTTTTCCTTTGTATTTGATACGTTGAGGGATGAATTATTATCAATAAAGTGAGGTATTGGGTTCAGCGATGGATCAAAAAAAAGTGCAGGCGTGTCGTACTCCTCATCGTTCTGGATAATACACGACACTGGATTATTATACCATGGTATGCGCACTGAACGG
PRP8	YHR165C.line.59.chrVIII.429707.436948_tile_18	YHR165C.line.59.chrVIII.429707.436948_tile_18	Saccharomyces cerevisiae	R64-2-1	chrVIII	435737	436153	-	TATGTTAAAGATTGGCTCTACGATTCCCGGCCCTTGGAGGAGGATAGTAAAAAGGTCAATGGTACATCTTATAAAAAGTGGAGTTTTGATTTACCTGAAATGTCGAACTTATATAGGTTATCAACGCCACTTAGAGATGAAGTAACTGACAAAAATTACTATTATCTTTTCGATAAAAAATCTTTTTTTAACGGTAAAGCCCTTAATAACGCAATCCCTGGAGGTCCTAAATTTGAACCTTTATACCCAAGAGAAGAGGAGGAAGATTATAACGAATTCAACTCTATAGATAGAGTAATATTTAGGGTTCCTATTAGAAGCGAATATAAGGTAGCGTTTCCTCATCTATATAATTCCCGGCCC
PRP8	YHR165C.line.59.chrVIII.429707.436948_tile_19	YHR165C.line.59.chrVIII.429707.436948_tile_19	Saccharomyces cerevisiae	R64-2-1	chrVIII	436099	436502	+	ATTCATCATCTTGAGAGTCTAAGGGAAGATTTATAGGATCCAGTGGCTCGATATTTTCTATGTGCTGTTCATATGACAGAGGTGGTTCGTCATCATCGAAAGGTGGAAATCTCATTCTTTTAAAATGTGTTCTATCTCGTTTTTCTCTCCTCATTGCTATCCAAGTAGCTGACCATTGGGCAGTATATACAGGCTCTATTACTCTTGGTGTTTCATTCACAAATGTTATGGCTCCTGAAGTGTGATATAAAACTTTAACTTCTTTGGCTTGCTCCCATGGATGAGGCATGTTCTCTAACAATTTTAAAATCGCGTGCGGTAAATACTTTAGAGCGCCTAGAAAAGCCTT
PRP8	YHR165C.line.59.chrVIII.429707.436948_tile_20	YHR165C.line.59.chrVIII.429707.436948_tile_20	Saccharomyces cerevisiae	R64-2-1	chrVIII	436447	436863	-	TGGTGCCATCATCGGTAAATGAGGATACATTCCTTCCGCCTCCACCACCTCCTCCAAGCAACTTCGAAATAAACGCTGAAGAAATTGTGGACTTCACATTACCACCGCCACCACCCCCTCCAGGTCTAGATGAATTAGAGACTAAAGCAGAAAAGAAAGTAGAATTACATGGAAAGAGAAAATTGGACATAGGAAAAGATACTTTCGTCACTCGAAAATCAAGAAAGCGTGCAAAAAAAATGACCAAAAAGGCAAAGAGAAGCAATTTATATACTCCTAAAGCCGAGATGCCACCGGAACATCTGCGAAAGATTATTAATACTCACAGTGACATGGCCTCCAAAATGTACAATACTGATAAAA
PRP8	YHR165C.line.59.chrVIII.429707.436948_tile_21	YHR165C.line.59.chrVIII.429707.436948_tile_21	Saccharomyces cerevisiae	R64-2-1	chrVIII	436809	437227	+	ATCGGATTATCCAGTTCTTCGATTTCGTATCCAGGCGGTGGTGGTGGTGGTGGTGGAAGTGCTAAGTCGCTGTCCTCTTCAAAACCAGGAGGTGGGGGCGGTAGTCCACTCATCTTTCTTTGACGCTATTTTTTTTTTGGAAGGAAGTTCAATCGCACAAGTATTTTCTATGGTCTTCGTTTCTCAAATTGTATTCCTAACTTTGTTGCTTTTGTACTAGCCGTATTACCTCGGTTCATCCTTCTGCCATGGTCACTTTAAATAGCTATATAGCCTGGCATTTATAAAAATTTCATATCATTTAGTACGAATAGCTATGTGTATGTTCACTTCACTACATATGCCTTCTGCACTCCCGAGCCAGC
PRP21	YJL203W.line.60.chrX.53341.54183_tile_1	YJL203W.line.60.chrX.53341.54183_tile_1	Saccharomyces cerevisiae	R64-2-1	chrX	53311	53739	+	TAAATGGAACCAGAAGATACCCAGCTGAAAGAGGACATTAAAACCACAGTAAATTACATAAAGCAGCATGGTGTTGAGTTTGAGAACAAACTGCTAGAAGATGAGAGATTCTCATTCATCAAGAAAGATGACCCACTCCATGAATACTACACCAAACTCATGAATGAGCCAACAGACACTGTCAGCGGTGAAGATAATGACAGAAAGAGTGAGCGAGAGATAGCAAGGCCGCCGGATTTTCTGTTCTCTCAATATGATACTGGAATATCCCGAAGAGACATGGAAGTAATCAAATTGACAGCACGCTACTATGCAAAGGATAAAAGTATTGTTGAACAGATGATTTCAAAGGATGGTGAAGCCAGATTAAACTTT
PRP21	YJL203W.line.60.chrX.53341.54183_tile_2	YJL203W.line.60.chrX.53341.54183_tile_2	Saccharomyces cerevisiae	R64-2-1	chrX	53685	54133	-	TTTGCTTACCTTGGTCGGATACTATCTTTTCTTCTTCATTTGTCGGCTTGATACTATCGAATAACTTAATACCAGTTTGTACTCTTCGCAGCCTCATCTGTTCTAAATCTAGAGAGCCTTCGAAGATTTCTGTGTCTTCAGGGATAGAAAATTTTGCCACTTGAGTAAATTTATCCCATGGAATGGCTGCAAATTGTATTTTGCACAACTCTACGAGCTTATCATGTTCCCGGTCTTTATCTTTCTCAAATTCCCAATACTGTGTTCTCTCAAAACAATTATCTAAAATGGTTCTCTTACTTTTCTTGATTTCTTGACCAGTAAAAGAATATACTCGCTTGTACTGGGCGACAAAATCAGTGAATGTCTTATGTAGCGGATGTGAGCTGTTCATA
PRP21	YJL203W.line.60.chrX.53341.54183_tile_3	YJL203W.line.60.chrX.53341.54183_tile_3	Saccharomyces cerevisiae	R64-2-1	chrX	54079	54501	+	AAAGGAGGAGATAGTAAGGGCAAAAAGCGTAAAATTAGAGCTGTGGGAGAGACAAGGTTAAAGAAAAGTAAAAAATAAGCCTCATGAAAATCAAAGTTAGCTAGAAGTATGTAAAGGTTGATGATGCACCGTAATTGAGCACATGTATCACTATTAACGGCGTACGTATTTTGGCGTTTTTTCATGTTGATGTTATTTTGTATATAGAAAGTGAAATTCTCGAGGATATGGCCCTACTGGATAATACTATTGGTAGCGTGAAAGAAGGCCAGGATGATAGATATCAACGTTAATAACATATTTTTTAGATCTTATTCAGTTGATCCTAACTCTGGTCACGCAATTTATGTCTTTGATTCGACTTATTTG
LSM1	YJL124C.line.61.chrX.187126.187644_tile_1	YJL124C.line.61.chrX.187126.187644_tile_1	Saccharomyces cerevisiae	R64-2-1	chrX	187092	187504	+	TTTCTTAGTACATGTCAGATTTATGGAAATCGTAAACGATACCATGGCGGGCCATTTTTTTACCTTTGTGGGTTTCCTCTTTAAACCTTTTCTCATCATTTTTTTGCTTGGTCAGCCAAGCCTCCTTAAATGGTATGCGTTCCATGGCCTCAAGGGGTTGATCTTCTTTATCGATGTCTACTTCGCCTAACATGACAACATTTTCACCACGAATCATGAATATGCCGCGGTCTTCTTCAGCGTATTTGTTTTCTTCGCTAAAATATATTCTCTCCACGCAATCTTGAAGTATCAAATTTGCATATTGGTCAAAGGTTCTTAGTACACCGAATAGCATTCTTCCATCACGCAAAAGA
LSM1	YJL124C.line.61.chrX.187126.187644_tile_2	YJL124C.line.61.chrX.187126.187644_tile_2	Saccharomyces cerevisiae	R64-2-1	chrX	187450	187878	-	TTCAGCACCTGTATTTCAATCTAGGGGAAGCCTGTATGACCAAGGGCTGATTAAATATTAGTGAAGATACAAGTAACACAGTTTAGTTATATTTTCTTTTCCTTTTCAACAGGATTGCCAACGCTGCAGTAGAGTTATACCAACATTTGCTCCGCTTTCAAAACCTATAAAAGAAAGCAGCCCTCGAATCGAATTAATTCACCAAAAATGTCTGCAAATAGCAAGGACAGAAATCAGTCCAATCAGGATGCGAAGCGACAACAGCAGAATTTCCCAAAGAAGATTTCAGAAGGTGAGGCCGATTTATATCTCGACCAGTATAACTTCACTACCACCGCTGCTATTGTAAGCTCAGTAGACCGTAAAATCTTCGTT
LSM8	YJR022W.line.62.chrX.469784.470113_tile_1	YJR022W.line.62.chrX.469784.470113_tile_1	Saccharomyces cerevisiae	R64-2-1	chrX	469658	470064	+	TAAAGGGAAAAAAAAAAACTAATCTTACGTGGTTCTTATAAGATGGACCAGCAAGCTGCATACAGTACACCATACAAGAAGAACACACTATCGTGCACCATGTCAGCCACCTTGAAAGACTACTTAAATAAAAGAGTTGTTATAATCAAAGTTGACGGCGAATGCCTCATAGCAAGCCTAAACGGCTTCGACAAAAATACTAATCTATTCATAACCAATGTTTTCAACCGCATAAGCAAGGAATTCATCTGCAAGGCACAGTTACTTCGAGGCAGCGAGATTGCTCTTGTTGGCCTCATAGATGCAGAAAATGATGACAGTCTAGCTCCTATAGACGAAAAGAAGGTCCCAAT
LSM8	YJR022W.line.62.chrX.469784.470113_tile_2	YJR022W.line.62.chrX.469784.470113_tile_2	Saccharomyces cerevisiae	R64-2-1	chrX	470010	470458	-	TAAAGATTATCCAGACACATGCGCCGTAATTGTGAGGAGACATGGCATTTTTGTTTGGGGTCCGACAATCGATAAGGCCAAAATTTTCAACGAAGCCATCGATTATTTGATGGAGCTGGCCATAAAGATGTACCAAATGGGGATTCCTCCCGACTGTGGCATTGGCGAAGAGAAGAAGCATCTGAAGATGGCCAGTCCGTGACGGGTTAATGCTTAAATTTATTGTATGATTTATATACTTCTATACATGGTATTATTATTATTATTATTATTATTATTATTATTATTATTATTATTATTACTATTATTGCAACTATATTATTTTGTCTTTGATTCGTACACTTTTTCCCATATTACATGCTCATTTTCGATTTTATTCTTGGTGTCCTTTAGCA
ISY1	YJR050W.line.63.chrX.528697.529404_tile_1	YJR050W.line.63.chrX.528697.529404_tile_1	Saccharomyces cerevisiae	R64-2-1	chrX	528669	529077	+	AATGAGTAGAAATGTAGATAAGGCCAACTCAGTTCTGGTACGATTTCAAGAGCAGCAAGCAGAGTCGGCAGGTGGATACAAGGATTATTCACGTTACCAGAGGCCCAGGAACGTGTCTAAGGTAAAATCCATAAAAGAGGCCAACGAATGGAAGCGACAAGTAAGTAAAGAGATAAAACAAAAAAGCACAAGAATATATGATCCGTCTTTAAATGAAATGCAGATTGCGGAACTTAACGACGAACTTAATAATCTTTTCAAAGAATGGAAGAGATGGCAGTGGCACATTGACCATACACTTATGGAAAAAAAAACCAAGAGGAAAAGGTTAGAAGACAGTCATGTGCTGATGAAT
ISY1	YJR050W.line.63.chrX.528697.529404_tile_2	YJR050W.line.63.chrX.528697.529404_tile_2	Saccharomyces cerevisiae	R64-2-1	chrX	529023	529461	-	TCTTCTAAATGTTTGAATAATTTTCCATAGCTAAAGGTTAAGTTCATCCATTAGTTTCTTTTTTCTTCTTTGCACTAACCAATGCTCCATATCTGCCAGAGTTGGTACATGGATTTCTTGTGTCTGCCTTGACATTTCTTCTTCATCTTCATTCACAGGCACATTATAATGTGCTTTCAAAATGGATGTCCAGTTAGCCTCAAATTCGGTTAAGGCGGCTGTGACTTTGCCATGGTAATAAAAATCATTTCTATCCTTCGGTATGCATTTGGTGTTTATAGAACCCCCATCATTCTGCCTTTGAGACTGCTTGAGCCATTCTTTTACTTCAGGCAATTCCAGGGCTCTTCCAAAATATCTCTTACCATTTATCAGCTTTCCTGAA
SNU114	YKL173W.line.64.chrXI.122517.125543_tile_1	YKL173W.line.64.chrXI.122517.125543_tile_1	Saccharomyces cerevisiae	R64-2-1	chrXI	122489	122926	+	AATGGAAGGTGACGATTTATTCGATGAGTTTGGAAATTTGATCGGAGTTGATCCTTTTGACTCGGATGAAGAAGAAAGTGTGCTGGATGAGCAAGAACAATATCAAACCAATACGTTTGAGGGGAGCGGCAACAACAATGAGATTGAGAGCAGACAACTTACCTCGTTAGGAAGTAAAAAGGAACTTGGAATTTCCTTAGAGCACCCTTATGGTAAGGAAGTGGAAGTATTAATGGAAACTAAGAACACACAGTCACCACAGACTCCACTGGTAGAGCCGGTTACAGAACGAACAAAGTTGCAAGAGCATACAATTTTTACACAATTAAAAAAAAACATTCCGAAGACTAGATATAATCGAGACTATATGTTATCAATGGCTA
SNU114	YKL173W.line.64.chrXI.122517.125543_tile_2	YKL173W.line.64.chrXI.122517.125543_tile_2	Saccharomyces cerevisiae	R64-2-1	chrXI	122871	123280	-	TAACACCTTCTACAACATCTATCACGATTAAAACCAAATCACTTGCTGCAAGTGCGACTGCCGTTTCATCCATAAAATTAACATGCCCTGGTGCATCCAAAAAGTTTATCATTCTAGACTTGGATTCTAAATCGGTGCAGAGTAGAGTGGAACCATTAAGTTTAATGGAAAGACCCCGGTCAATCTCTTGTTTCAAATTATCCAGGTATCTTAGCGGTTTCCATCCAAGTTCTACATTCTTAGACATATCTGGTATGCGTTTGTGTGAGTCGATTACTAGGAGATCCATCAAAGAGGTCTTACCTGAGTGAAGAGGTCCAATGACACCAACATTTATTATCCTCTCCGGAATGTT
SNU114	YKL173W.line.64.chrXI.122517.125543_tile_3	YKL173W.line.64.chrXI.122517.125543_tile_3	Saccharomyces cerevisiae	R64-2-1	chrXI	123225	123639	+	ACATTTGTGGTAGAGCAATTGATAAAACAAAGTATTAAAAATAATGTAGCAATGTGTTTTGTTATAAATAAACTCGACAGATTGATTCTAGATTTAAAGTTGCCACCAATGGACGCATACTTGAAGTTAAATCATATAATTGCAAATATCAATTCCTTTACGAAGGGAAACGTGTTTTCACCAATAGACAATAACATAATATTTGCGTCTACAAAGCTGGGCTTCACATTCACTATCAAGGAATTTGTTTCTTATTATTACGCCCACTCCATACCTTCTTCTAAGATAGACGACTTTACCACAAGGCTATGGGGTAGCGTATATTACCATAAAGGTAATTTCAGGACAAAACCATTTGAAA
SNU114	YKL173W.line.64.chrXI.122517.125543_tile_4	YKL173W.line.64.chrXI.122517.125543_tile_4	Saccharomyces cerevisiae	R64-2-1	chrXI	123585	124021	-	AAAAGTCCAGAGTATATCCGTACAAGGGACCACTCTGCTCCACCGTAATCCACAGTTTTCAGTACATGAGCCCAAAGAGTGCCTTCTGGTGTAGATTTTCCTGGAATTGAAAGATGAGCTGTCTTATTGTCGAATAATTCAAATGGTTGATAACATCTGGTTATCGCATCTACAAGACCGGTTTGTTGCCTAAATATTAACTGTAGAACGTGTTTTAAAAAAGGTTGCGGATCGTACTGGAGGGCCTCTTGACTTAAATTAACTCTAAAGTTAGACCTTAACAAATTCTTTAATTTATCTTTCTCCATAGATAAAGCGTAGGAAAATATTTTATAAAGCGGGATGAGGATAAATTCAACGAAAGTCGGGTACTTCTCTACATT
SNU114	YKL173W.line.64.chrXI.122517.125543_tile_5	YKL173W.line.64.chrXI.122517.125543_tile_5	Saccharomyces cerevisiae	R64-2-1	chrXI	123967	124383	+	TGAAGAGAGGGGATACAGTACGTATACTTGATACATCACAATCTGAATCTCGCCAAAAAAGACAGTTGCATGATATCTCAAAGACGGAAACCTCCAACGAAGATGAAGATGAAGATGACGAAACGCCTTCATGTGAGGTCGAAGAAATTGGCTTATTAGGTGGCAGATATGTCTATCCGGTTCATGAAGCACACAAAGGACAGATAGTATTAATAAAAGGTATTTCAAGTGCATATATTAAATCCGCGACGTTGTACTCTGTAAAGAGTAAGGAGGACATGAAACAGCTAAAATTTTTCAAACCTTTAGATTATATTACCGAGGCAGTTTTCAAAATTGTTCTTCAACCTTTACTGCCAAGGG
SNU114	YKL173W.line.64.chrXI.122517.125543_tile_6	YKL173W.line.64.chrXI.122517.125543_tile_6	Saccharomyces cerevisiae	R64-2-1	chrXI	124329	124743	-	AGTTTTGACCCTTTCCCAATGTGTTCCTGCTCAAATCCTGAATCATTTTAGAGTCCATTGGTTCAGCGGCTACACTAATCGACAGACCTGGTAAATTTTCCTCACCAAGGCGAGATATCGAATTACTTACAGGTATTGAAGCGAACGATTCATTTGAGCAACTTTCAGAAAAAACAGTTAAAGGATCAGATATTTTAATTTCTATCTTTGCATAACTCGCTCTTAGATCATACAACAAACAGTCCATATACAGCTCTCCATTTCCTAGTATTACATGTTCTCCAGATTCCTCAACTTTAATAATAACGCCTGGGTAGTATTTCGAAATTTTGTTCAGGGCATCCAATAACTTGGGTAATTC
SNU114	YKL173W.line.64.chrXI.122517.125543_tile_7	YKL173W.line.64.chrXI.122517.125543_tile_7	Saccharomyces cerevisiae	R64-2-1	chrXI	124689	125099	+	TGCTTGGATATTGACGGAATAATGGACAACCCAAGGAAACTATCCAAAATATTGAGAACCGAGTATGGGTGGGATTCGTTGGCATCAAGAAACGTTTGGTCTTTTTATAATGGCAACGTGTTGATTAATGACACTTTGCCAGATGAAATCAGTCCTGAATTATTATCCAAATATAAGGAACAAATAATACAAGGATTTTACTGGGCTGTAAAAGAGGGGCCTTTGGCAGAAGAACCAATTTATGGTGTACAGTATAAATTGTTATCGATCTCAGTACCTTCCGACGTAAACATTGACGTTATGAAAAGTCAAATTATTCCGCTAATGAAAAAAGCCTGTTACGTTGGCTTACTGACA
SNU114	YKL173W.line.64.chrXI.122517.125543_tile_8	YKL173W.line.64.chrXI.122517.125543_tile_8	Saccharomyces cerevisiae	R64-2-1	chrXI	125045	125449	-	TTCATCACGAAATCACGACTTAAACTGTTGATAGGTGCGGGTTTCAATTTTGGAATAAACGCATCTTTATCCAAAACATCACCAGGAACCTTCCTCCATATCTTGTGCCAAAAGTACAGCTGACACATACCAAGACCATTCGTAGATAATCTCAAATCTGTCTCGAATCCTGCAGATTCAATAACCGGAACTTGTCCACGAACCTCCAACAATGGTGTCCCTGCCACTTTTATTGTTTTGTATATCCTGCTTCCACGTCTCTTCTTCATAAGTTCCTCTACTATTGGCAGCAAGGGGGCGTGGACCGTGATGTCAACTTCATAGATGGGTTCCAATAAAATTGGGATTGCT
SNU114	YKL173W.line.64.chrXI.122517.125543_tile_9	YKL173W.line.64.chrXI.122517.125543_tile_9	Saccharomyces cerevisiae	R64-2-1	chrXI	125395	125795	+	AAACAAGAAGGCGGAAGGGTATTTCTACAGGTGGATTTATGTCAAATGATGGTCCTACGCTTGAAAAGTATATAAGCGCTGAATTATACGCTCAATTAAGAGAAAATGGCTTAGTACCGTGAAAATCTTGGCGCATAAGAATTAAGCAATATGTCCACAATATTTTTATTCAGCAGAATTTACATATGACTTCGTATTTAGTGATATAACTACTCATCGGGACTGAAAATTTTTTATTTCTGCCTAAATACAGATGAGATGAGCTTTATAGAATTTTACGCTGTTAAAAAGTTAAACGGTAACAAAGCACAGTTAGTTGAACAACGGTATATAGAGAATGGCTAAAG
DBR1	YKL149C.line.65.chrXI.167612.168829_tile_1	YKL149C.line.65.chrXI.167612.168829_tile_1	Saccharomyces cerevisiae	R64-2-1	chrXI	167580	168006	+	ATCTCTCAAGTCATGAATTTAGAGATAAATGCTTTAGTTTGTCGTACTTCATCTTTCTGAATATCTAAGGTGTATGCAGGAATGGCATAATTTTCCCAATCAATATCCCTTCCTTCCTCTCTATTAGATTGAGACAGTTCTATCCAATTGACGCTATTAAACGGTTTATTGCTTAGGAGATTCTTATTTTTTTGACAAATTACCAAATTATTGATAAATTCAGGATCCCAGAACATACGGTGATTCTCGTCCTTCCACGAAGCATGCGATGTATCCGGTTCTATTTCCAGAATTTCTAACCAACGTCTTCTTGGCAGGCACTTGTCCAACGCCAAGAACCGTGTCTCGCCGTATTTGGAATCATACTCATTCT
DBR1	YKL149C.line.65.chrXI.167612.168829_tile_2	YKL149C.line.65.chrXI.167612.168829_tile_2	Saccharomyces cerevisiae	R64-2-1	chrXI	167952	168388	-	TGTAAGAATTTCTGATATTGCTCCTCTTTTTATGATCAAGCATCGTATTGATATTATGCTGAGCCACGATTGGCCCAATGGAGTCGTTTATCATGGCGATACTAAGCACTTGTTGAAGCTTAAGCCTTTTTTTGAGCAAGATATTAAAGAGGGAAAACTAGGCAGCCCAGTGACCTGGCAACTACTAAGAGATTTGCGGCCTCAATGGTGGTTGAGCGCCCATTTGCATGTCAGGTTCATGGCCTCCATTAAGCATAATAAAAGAAGCCACGAACCGCCTAATAAGTCAACTTCAAAGACAAAAAAAAACAATAATGAAATAGATTTGGATTTATCCAGTGACGAGGACGAAAGGTCTGGTATTATGAATTGCCAAGAAGA
DBR1	YKL149C.line.65.chrXI.167612.168829_tile_3	YKL149C.line.65.chrXI.167612.168829_tile_3	Saccharomyces cerevisiae	R64-2-1	chrXI	168330	168748	+	ATGATACAGATTTCTTATGTTAGCTTTCCAATTGTTATTTTCTAGGTCATTCCAATCTGGTCGTTGCTTATTGAAATCCCACTCTTTCCATATCCCGCTCAATGAACCTATCCTTATGCCTTTAAACCATATAACGTTAGAGTATCCCATATAAAAAATGTTCTTTGCTACATAACCACCATGTGGCAGAAGCATTAAATGTCTCATCGATTCATGATTACCGCCAATAAAAATAGTAGGGACTGGGGCTTCAATCTCATTATTGTAGTATGATATGAAATCACCGAGTCTTTGATATTTTGGTGGTATGGCTATTGACTTAAAATCCTGACCATCACGAATACTTTGAAAATCTCCAAGAAT
DBR1	YKL149C.line.65.chrXI.167612.168829_tile_4	YKL149C.line.65.chrXI.167612.168829_tile_4	Saccharomyces cerevisiae	R64-2-1	chrXI	168694	169125	-	ATTAATATACATTTACATAAAGTTTCTTCTTATACATACTCTATTTATTTAGTTATTTATTAACTTACTATTTATTTATTTATTTATTTATTTATTTATTACTTTCAATTTTTTATCGAGGCATTTCCTTAGTTCTCCAATTTTTTTTCTCATTAGCCAGATGTGTGTTTTTCTGGCCCTCACAAAAAATGAGCAGGAGAAAGTCATATGGCGAACGTAAATATGTAACTAAAAATTAAGATGGGCAGACATTTATCATTTTGCTTATGACTAAATTGCGAATTGCTGTACAAGGGTGCTGTCATGGTCAGCTAAACCAAATTTATAAAGAAGTGTCACGAATCCATGCGAAGACTCCCATCGATCTATTAATTA
YJU2	YKL095W.line.66.chrXI.262277.263113_tile_1	YKL095W.line.66.chrXI.262277.263113_tile_1	Saccharomyces cerevisiae	R64-2-1	chrXI	262249	262667	+	AATGTCTGAAAGAAAAGCTATTAACAAGTACTATCCACCGGATTACAACCCACTGGAAGCTGAAAAGCTATCCAGGAAAATGGCTAAAAAACTGAAAACCATGAATAAGAGCCACGCATCGATTAGATTAATGACCCCATTTAGTATGAGGTGTTTGGAATGTAACGAATATATTCCCAAAAGCAGAAAATTCAATGGTAAGAAAGAGCTACTGAAGGAGAAGTACCTGGACTCCATTAAGATATATAGACTAACCATTTCATGTCCACGTTGTGCCAATTCCATTGCATTTAGAACAGACCCCGGTAATTCAGATTATGTAATGGAAGTGGGGGGCGTAAGAAACTATGTCCCTCAGAAACCAA
YJU2	YKL095W.line.66.chrXI.262277.263113_tile_2	YKL095W.line.66.chrXI.262277.263113_tile_2	Saccharomyces cerevisiae	R64-2-1	chrXI	262613	263025	-	TCATCGTTGTTATTGCCAGGTTTATTGGTACGCTGCCTGTGATTGTCAAATACCTGATCTACGAGGTTGTCCAGATCATCAGTCGTTACTGCTTTTTCTTGTTGTGCGTGTTTGCTGCGGTTTATCATTTCAGCTCTCTGGCTCATTTCAAGGTTTTTTTTCCTTAAATTTTCAAGTTCCTCATCATCCTCTTGCTCTTGTTGAATTTTGGCTAGTCTTTTTTCCAGCAAATCCATTTTGTCATCTGCTTGCTCCTTTATACCCATCTTCTCGTTCTGCTCCATTTCCTTCTCTCTCACTAAGCGTTGCAGTGTCTCGTCTATGCTTTCGACAGCTGTTTTAGCGTTCAGGTCATCATT
YJU2	YKL095W.line.66.chrXI.262277.263113_tile_3	YKL095W.line.66.chrXI.262277.263113_tile_3	Saccharomyces cerevisiae	R64-2-1	chrXI	262971	263401	+	AGAAGAGAACTCCGTTGTTTAATCCTACATCCACTAAGGGAAAAATACAGAAGAAAAGCTCTGTGCGTACGAATCCGTTAGGGATAGTTATAAAACGAGGAAAGTCTCTCAAATGACCTAGAAAAGTAAGGAACGTACGATTGGTATCATGATCTCTTGTGATGCTGTGCTACTGTGGTTGCTTCCACACTATAGCGTCCATCGCTACTTACGAGGGGCGACAGCCCCTTCGGACTTCGAAGTGTCTGGCCGTTTTTTCATTGAATTTTCTTATAAATGAATACATATCGGAAAAGCCATTGTTGACTAAAGCAAGCCAAAGCCACACAAACCGAGGACAAATAGAAAAGCATGGCTCCGTATCCATACAAAGTGCA
MUD2	YKL074C.line.67.chrXI.294610.296193_tile_1	YKL074C.line.67.chrXI.294610.296193_tile_1	Saccharomyces cerevisiae	R64-2-1	chrXI	294580	294986	+	TTTAGGAAAGTTGGGTTGCTTCCATCATGTCAAAGTCGTCCTCATCTATATAAGTACACAGAACAGTGCGATCGTTGAATTGCGTACCCGGCAATTCTTCCATTGCGTGTTTTGCTGCCTCCAAGGTCTTGAACTTGATATAAATATTACCGGCTCCGGAAGCCAAGTTTTCAAAATTAAGTCTGTAATCGACGCCGGGTTGGCATATTTTAATCGTATCTGCTCCCGCGATACTATACTTTAATGTTTCTTTAATTTCTGTGATAAAGGTTTCATCTTTCAAATCCAATGGATCAAGACAATTTAAGAGCAACAAAACTCTCGATTCAACACGAACAGATTGGGTAACCA
MUD2	YKL074C.line.67.chrXI.294610.296193_tile_2	YKL074C.line.67.chrXI.294610.296193_tile_2	Saccharomyces cerevisiae	R64-2-1	chrXI	294932	295372	-	TGCGAAGCTTGGTACTTTCGACTTAAAATGGAGAAGACCTAATGATTATGTTCAACAACTTGATCATCTGGTCGATTTTTGCAGGGGTACGGTAATTGCATTGGAAAATTTGGAAAATATAGGCGAGGGTGAAGATTATAGAATGAAAGAGCTTTTTTCGTCATTGAATGTAACAAACGGTACCGCTAAGCCACTTTTTTACAAATGTTCGTCCAATACAAACAACACTGGCAAAGAATCCGAATTCACTAAATGTATTCTATTATCGTTTGAAGTCGTCACTCAGGATATTCTTGATAAATTAAAACCATACAAATGGTTCAAGCCAAATGATGGAAAGATATCACAAGTTACTTCATGGATTACGTTTCAAAGCCTGCCAAATCT
MUD2	YKL074C.line.67.chrXI.294610.296193_tile_3	YKL074C.line.67.chrXI.294610.296193_tile_3	Saccharomyces cerevisiae	R64-2-1	chrXI	295318	295750	+	ATTAAAGAATGATCGACAGGCCAAAACCATAGTGCTACAGATCTGAGAACTAAACTCAACAATAATATGGTCCGGCCTTCCTTCACCAATATAAAAGTTGGAAATTTTAAAGTCCTCCGCATTACTCTCAGTTTTCTGGAGACCTGAAATAAAATTTTCCAGCAAATCTTTCAATCTTGCTACAATGCTGGGGTCGCTGCTTTGAGACAAGCCCGAAATTACAAGCCTTGAATTTGCCTTGGATGAGGCCATGTTGTAGTAAGCCGGAGAATCGAATGATGAACCCGGGTACATTACATTTTGGGAATTATAGTTCATGTCATATTTATTAGTTTGCAACTGCCTTTTATCACGGTCGCCATTGAATTTAGAACCTTCG
MUD2	YKL074C.line.67.chrXI.294610.296193_tile_4	YKL074C.line.67.chrXI.294610.296193_tile_4	Saccharomyces cerevisiae	R64-2-1	chrXI	295696	296132	-	ACAAAAGATTCAACACGGATAATGCAGTTATAGATACACATTTTAAGAGGCAAAAAAGTGACGGTGAGCTTCCGAAAGCGCCAAAAAGTAGAAACGTTTCACATTCTAATAACAGAGGACCATCGTCAATAATTACTATGAGCACGAATCGAACGACTTATGAACAAACAAGGGCAGGTCCTCATCGTCAAAGTTATCGGGATGCATCGGGAAGATCATATAACAGGGAGAATCGGTATAGTAGTCACAATACTGGGCCCCAATGGAACAACAATCCCTATAATAGGCAACGGGATGAAAGAAGAGGAAGAAATGAAAGGTTCGATAGAAGGGGAAGAAATGGAAACGGAAACTACGATCGTTTCAATTACCAAAGGAAGAAC
MUD2	YKL074C.line.67.chrXI.294610.296193_tile_5	YKL074C.line.67.chrXI.294610.296193_tile_5	Saccharomyces cerevisiae	R64-2-1	chrXI	296078	296500	+	TTCTCAATCGGCACAACATCCTTTTCTGATTTTCCTATAGACTCCATTATTTTGGATCTCAAATCCTCCAGTCTCTTTTCATCAGCCATCTCCGTGTGCTTGTTTTCTGTGTCAATTAACTTTCCTTTTCTACTTCTTTTATATTAGCATGTACAGTTTAATTTCTCATCTCGAATTTTTTCAGCACTTGCTAATTAGGCGCGCGCCTCAAATATATAATATCGAACACGCTGTTATAAAAGTGATCCATTCTACAGCGTAATATTAACAGTATCGCTCCTGCAGTATTCTGGCATTATTAGTGCAAATAAGTACGCATATTACCATGCGAAACGTTTTAAGGCTTTTATTTTTAACAGCTTTTGTTGC
PRP40	YKL012W.line.68.chrXI.418310.420061_tile_1	YKL012W.line.68.chrXI.418310.420061_tile_1	Saccharomyces cerevisiae	R64-2-1	chrXI	418280	418702	+	CTATGTCTATTTGGAAGGAAGCTAAAGATGCAAGTGGAAGGATATATTATTACAATACTTTGACAAAGAAATCTACGTGGGAGAAGCCCAAGGAACTAATTTCTCAGGAGGAGCTACTTCTTCGAGAAAATGGCTGGAAGGCGGCCAAGACGGCAGACGGCAAAGTATACTATTATAATCCAACAACAAGAGAAACCAGCTGGACTATTCCGGCCTTCGAGAAGAAAGTAGAACCCATCGCAGAACAAAAACATGATACAGTATCCCATGCACAGGTTAATGGAAATAGAATAGCCCTTACGGCTGGAGAAAAACAAGAGCCGGGACGAACTATAAACGAGGAGGAAAGCCAATATGCTAATAACTCT
PRP40	YKL012W.line.68.chrXI.418310.420061_tile_2	YKL012W.line.68.chrXI.418310.420061_tile_2	Saccharomyces cerevisiae	R64-2-1	chrXI	418648	419054	-	AGTGTTTGTATATTGGTTCGTCGGCAATTAGTCTCTTTGCGGTAGGCCAACGGGTGTAATATTTTATATGAGAATTGTTTTGCAACATTTTCTGAAAGGCTTCTTTGAATTTGCTTGTTTCATTGTGTTCCTTAAGAAGTTGATCGGCTGATCTATTGGAAAGATATTTCTCAAACATTTCTTTCTTCCATAAGGGGTCATCATCGACCATCCAATACCTTGGATCTCTGGTCCCCAGTTCTGAAATAATTCTACTGAATGACCAAGTAGAGTCTACTTGATTTTCCTTCAGCATGGTAATAAATTCCTTCTCTGCTTCTTCTTTAGTCCTTCTCCTGACATTAAGCAGTTTA
PRP40	YKL012W.line.68.chrXI.418310.420061_tile_3	YKL012W.line.68.chrXI.418310.420061_tile_3	Saccharomyces cerevisiae	R64-2-1	chrXI	419000	419422	+	TCCGTGGTCAATGAAAAGACAAAGAGACAGACCTTTCAAGATTATATAGATACCCTCATCGACACTCAGAAAGAATCAAAAAAAAAATTGAAAACACAGGCCCTAAAAGAACTAAGAGAGTATTTAAACGGTATTATAACAACATCATCCTCTGAAACTTTCATAACCTGGCAGCAGCTTTTAAATCACTATGTTTTTGATAAGAGTAAGAGATATATGGCGAACCGGCACTTCAAAGTCTTAACCCACGAAGATGTTTTAAACGAGTATCTGAAAATAGTAAATACGATTGAAAACGATCTTCAAAACAAACTAAATGAGCTCCGACTGCGCAATTATACCAGAGACCGTATTGCTAGAGATAACTTT
PRP40	YKL012W.line.68.chrXI.418310.420061_tile_4	YKL012W.line.68.chrXI.418310.420061_tile_4	Saccharomyces cerevisiae	R64-2-1	chrXI	419368	419798	-	TTTGGAGTTTCTGTTGTATCTTTTCGTTTCTTTGCTTTATCAAACCATCAACAATCAAACTGATGTCTTCTTTATCCACCTTGTCAAATTTCCGGTCATTTTCCAGAACTTTTTCTATGTTTTGCTTGGTGATCTCGTCGCTATCGGCATCATTCCATTCAAAATTTTGATCTATCAACGTCTGTTGGGCTATTGATCTTTGTGCAAAGATGTACATCCTTTGTTCATCAACAAAATCTAAAAATAAATCAAGGCAGGACGAGCCATTCCTTCCAAGCATATGTAAAAAGCGCGGATCAGACTTTATATGAGGATAAATATCTGACCATCTAGTATTTGCTTTGATTTTGATTGGCACTTCTCTTAATAAGCTTTTA
PRP40	YKL012W.line.68.chrXI.418310.420061_tile_5	YKL012W.line.68.chrXI.418310.420061_tile_5	Saccharomyces cerevisiae	R64-2-1	chrXI	419744	420158	+	AATGAGCGTAGGATATTGGAGCAAAAGAAGCACTATTTTTGGTTACTTTTGCAAAGGACATATACAAAAACCGGTAAGCCCAAGCCTAGTACGTGGGATTTAGCTTCCAAAGAGCTTGGCGAATCTCTTGAATACAAGGCACTAGGCGATGAAGATAACATAAGAAGACAAATTTTCGAGGATTTTAAGCCTGAAAGCTCTGCACCGACTGCCGAAAGCGCTACTGCAAACTTAACGTTGACCGCGTCAAAAAAGAGGCATTTAACTCCGGCTGTGGAATTGGACTATTGATTCTGACGTGTCGACCTCTATCTTGTTAATCATTATATAAATTATACATAGAGATTACATGTTATTTCAA
NTR2	YKR022C.line.69.chrXI.482171.483139_tile_1	YKR022C.line.69.chrXI.482171.483139_tile_1	Saccharomyces cerevisiae	R64-2-1	chrXI	482125	482573	+	AATAACATGATTAACGTTCAGTTACCAATGAGCTTATTTATTAGGCTTGCTTTAGATTTTTCCAAGTCAATTTTTGTTTTTTCTAACGCTTGCAACCTCATCTCAACCTTCTTCCTTTGCAAGCAGATCTTCGAAACCATCTCGTTTATTCTCTCAATGCTGTTCCCACTTTCATCATCGTCTGGGAAAAGTACCGGTAAGGGCGTGATGATTTTCTCATTCGATTTGTTTATATTTCCTTTGCTTAAAAGCTGGGTTTCCCATTCTTCATTAGTTCTGTAGGGCACTTCATTTATGGCCTTCTCTATAATCTTTCTTTTAGAATCCTTTTGAATAGCAATTTGATTATCCGTGAGGGCTAGCATTTCGTCTTGAAAGCCTTGCATTTCATCG
NTR2	YKR022C.line.69.chrXI.482171.483139_tile_2	YKR022C.line.69.chrXI.482171.483139_tile_2	Saccharomyces cerevisiae	R64-2-1	chrXI	482519	482968	-	TGGCGAACAAGCAATAAAGGAGGATAATTCGCATTATGAAGATCTTTACCATTCAAAGAAAAATACCAATGCATCGACGCGAAACAAAGATGATTTGCTAATTCTCAATATGGAGGACTTGATGGAGGGGAATCATCATCTATTAAGTGATTCTTCAGAGGCTGGCAGTAGCTCCGAAGGTGAGCACATTAGTAGTATACCAACCCGAGGAGAAATTGCAAAACTGAAAGCACAGAAGTCATTATCTAGAAGGAAAATTAGTGAGAGTGATGTTACAACAGAAAGAGATTATGTAAAATTGTTGGACAGTGAGGATAAACGCGAAATTATGGAGACAATAAGATTAAATGGTGGTCTGAAACGTAACAATGAAAAGGAGATTACGAACTTCAGTGAC
NTR2	YKR022C.line.69.chrXI.482171.483139_tile_3	YKR022C.line.69.chrXI.482171.483139_tile_3	Saccharomyces cerevisiae	R64-2-1	chrXI	482915	483363	+	ATCAAAGGTAATGTCGCGCTTAGGAACTTTTTTAAACTTTATTGGTTGTAATACACAAATGTCGTTGTCATCATCTTCAGAATCGTTCGACACTAGGGGCTTAATTTGCTGCATTGGCTTATGCGCAGAACCATCAATTCCAACCTCCTCAGGAGAACCACTTGGTAACCTAATTTTATTTCTTTTCTTGATCGCCATAATGTGTTCAAATGCTATAACATTGCTAGGCAGAACTTGACGTAACTCGACCAGTTATATTGCTTCTTCAAAGCACAAATTTATGATGATTGCTTTCAGTTATGAGGTTCATTTCGATATTCTTTATGATCTTCGCTTGCCGGGTATCGGACAAATATTGAAATATTATACAGCAAGAAAGAGGCATAAAGAGCCTG
PRP16	YKR086W.line.70.chrXI.599857.603072_tile_1	YKR086W.line.70.chrXI.599857.603072_tile_1	Saccharomyces cerevisiae	R64-2-1	chrXI	599829	600256	+	TATGGGTCATTCGGGGCGTGAGGAAAGGATAAAAGACATATTTAAGGAACTTACGTCAAAAGAACTAACGCCTGGGTTGCTTTTGACACTGCAGAAACTAGCGCAAAAGCCGAATACTAATCTAGAACAGTTTATTGCCAGCTGTAAAGCTTTGACGAAACTCAGCAGTAACAATCCAATCATTTTTAATGAACTTCTGGAGCTCCTCAAGAATAAATCTGAAGAGGACTCGACAGGCCCAAAGAAAATCGCCCCTTCTATAAATAAGAGAAAGAAATTTAAGATCCAGTTAGACCTTGACGATAATGAAGATGAGCTAGATTCTCCAGTTCAAAAAAAACCAGCACCTACACGGACGTTGTTCAAGAGAATAGA
PRP16	YKR086W.line.70.chrXI.599857.603072_tile_2	YKR086W.line.70.chrXI.599857.603072_tile_2	Saccharomyces cerevisiae	R64-2-1	chrXI	600203	600613	-	TGGGCACTTTGTTTTCAAGAGCAAACTTTGATAAAAAAGGAGGGATCCATTCCATTCTTTGCTTGAGTGGTATGGGGTATAATTGAACGGTATTTCGTAAGGCATCATCGTTGTCGATATTCCTAATGACAGGTAGTAGTTTCGCTTCCTCAGGCAATTCAGACAGAGGTTCAGGCACCAAATTTCCATAATCATCATCATTATCATACCATTCTCTGTCCTCCTCAACTACTTCGCTTCGAGTCGGTTCATAGTCCTTCGTTTCAGCATGACCATTCTGTGTTTGCTGTTCACTATTTGGAGAAGGATCCTTCACGGTGGGCGAATACTGCCTCAACTGTTTGGCCTTTAGTTTAT
PRP16	YKR086W.line.70.chrXI.599857.603072_tile_3	YKR086W.line.70.chrXI.599857.603072_tile_3	Saccharomyces cerevisiae	R64-2-1	chrXI	600559	600995	+	ACTTCCATAATTATCGGGTCCATCTCTGAGACGTCCAGCCAAGTATCCGCTTTATCAATGGTGAATCCATTTAGGAATCCTGACAGTGAATTTTCTGCGAACGCCAAACGAGGTAGTAAGCTGGTTGCCTTGAGAAGGATAAACATGGAACATATTCAACAATCTCGAGACAACACCACTGTTTTGAACACTGCCATGGGGGAAGTACTAGGCTTGGAGAATAACAATAAAGCAAAAGATAAGAGCAACCAAAAGATTTGCGACGATACAGCTCTTTTCACGCCATCAAAAGATGACATTAAACATACTAAAGAGCAACTGCCTGTTTTCCGCTGCAGATCTCAATTGTTATCATTGATAAGAGAAAATCAAGTAGTGGTGAT
PRP16	YKR086W.line.70.chrXI.599857.603072_tile_4	YKR086W.line.70.chrXI.599857.603072_tile_4	Saccharomyces cerevisiae	R64-2-1	chrXI	600941	601389	-	TATGAGTTTTAGATCTCTTCTACGTGCTAATAAAATCTTGAAAAAACCTAGTAAAATGTCTGTATTTAATGACCTTTCATGAGCTTCATCAATAATAACACACGAATATTTATCGAGTGTATCATCCAATAAGGTCTCTCTGAGTAGAATACCATCCGTTACAAACTTAAGTTTTGTACACTCAGAATCCGTCACATCTTCAAACCTTATAGAATAGCCTACTTCCTTACCCAATGGAACTTGCATTTCCATTGCAACCCTTTTTGCAACGGATATGGCTGCTACTCTTCTCGGCTGTGTGACAACAATAGATTTCCCCCTATCGTTGGCATATCCTTCTTCATATAAATACTGTGCAAGTTGCGTGGTTTTACCTGAGCCCGTTTCACCAATTA
PRP16	YKR086W.line.70.chrXI.599857.603072_tile_5	YKR086W.line.70.chrXI.599857.603072_tile_5	Saccharomyces cerevisiae	R64-2-1	chrXI	601335	601752	+	AATCACTTCAGCAACAATGAATGCGAAGAAGTTCTCCGCATTTTTTGGTAATGCTCCTCAGTTCACAATTCCTGGAAGAACTTTCCCCGTACAGACCATATATACTTCCAACCCTGTTCAAGACTACGTAGAAGCTGCAGTTTCTCAGGCTGTGAAAATTCATTTAGCAAACGATTGTTCAAGCGGTGATATTCTCATTTTCATGACAGGTCAAGAAGATATTGAAACAACGTTCGACACTCTGCAAGAAAAGTTTTTGCAAGTATATTCTAAAAAGTTTGGTACCGCAAACTTTGAAGAGATCAATGATATTGAAATTTTACCAATCTACTCGGCTTTACCTGCAGATTTGCAATTCAAAAT
PRP16	YKR086W.line.70.chrXI.599857.603072_tile_6	YKR086W.line.70.chrXI.599857.603072_tile_6	Saccharomyces cerevisiae	R64-2-1	chrXI	601697	602110	-	AACTTACTCAATTCGTCAGTAACGTCCAGAGATTTTAGCAGTAAAAGGGTGTTTGACAAATTCGTTCTTTGGATCTCAGGTATTGTCTGTAAGTACATATCTTCTTTGAATGTATCTTCCGTGTATAATCGATATGCAGTGCCTGGCGCAGTTCTTCCCGCTCTTCCGGATCTTTGGTCGGCGTTAGCTTTTGATATGGGCGTTATTACTAAACTATCAAGCCCAATCTTTGGATTGTAAACTTTCAGTTTAGAGTAACCACAATCAATGACATATCTAATACCTTTAATGGTCAATGAAGTCTCTGCAATATTTGTCGCAATTATAATTTTCCTTTTAGTGCCATGTAGATCCTGAAAAA
PRP16	YKR086W.line.70.chrXI.599857.603072_tile_7	YKR086W.line.70.chrXI.599857.603072_tile_7	Saccharomyces cerevisiae	R64-2-1	chrXI	602057	602483	+	TCCCGTTCATTGATAAACCACCCTTACAAACATTTTTATCCTCATTGTATGAGTTATGGTTCATAGGGGCTATAGACACTAGTGGACAATTGACTCCATTGGGATTACAGATGGCAAAATTTCCCCTGCAACCTTCCCTTTCCAAAATTTTATTAATTGCAGTTAGAAACGGCTGCAGTGATGAAATGTTAACAATAGTTTCCATGCTTTCTGTTCCACAAGTCTTTTATAGACCCAAGGAAAGACAGAAAGAAGCAGATATTGCTAGAAATAAATTTTTTATCGCGAAATCAGATCACTTAACGTTACTTAATGTTTTTGAACAATGGAGGGCAAATAATTTTAGTTCGCATTGGTGTAACAAACATTTTGT
PRP16	YKR086W.line.70.chrXI.599857.603072_tile_8	YKR086W.line.70.chrXI.599857.603072_tile_8	Saccharomyces cerevisiae	R64-2-1	chrXI	602429	602869	-	TTGTGGCCTCCTGATCATTTTTAATACGCTTGATGTCGTAGAGTAACCCACCATATTCCATTAACCAGAATGGATCTACAGAAGTAACACAACAAATGTATTCTTTGCTAGTCATTAATAATTCATGATATACCACGTAAGGGGGTAAATCCCCCAATCCGTGTAATGCACTTGTAGGGTGTAGTTGAACACTTACGCCAGTTTTTAAATGAACGTAATTTCGTAGTCCTGTTATTTTGGCTGCTTGATGAGCAAATCCTGAACAAATACATTTTTTAATAATATCCCAGTCCTTACCGGAGGAAATGACCGGAATTTTTTGAGATTTTAGTATTGTTAGCAACTGGTCTCGAATGTCTCTTGCCCTGACAAGTGATTTGTATTGAA
PRP16	YKR086W.line.70.chrXI.599857.603072_tile_9	YKR086W.line.70.chrXI.599857.603072_tile_9	Saccharomyces cerevisiae	R64-2-1	chrXI	602815	603251	+	ACTACAGGCCTCTTTGGTGAACACTATGAACATACTCTGGACAAGGTTGAAGATGATATTGATATCAATATTAGGAGATGTAAGGATATGAGAGACAGTGTGATACAGGAGCTCAAAATGACCGACAATTCAAACAAAGAAGACAAAAAGCAAAAAACGAAAAAGCAAAATATACTGAACGGCAAAGAAAATTCAATGAAACCTTTCAAAAGAAGGAAGCCTTTTTTTTAGTTTATGGGAAGAGCGTGCTAATAGGCAAAATATTCATATATGTTATTATATAGTTATATGCATGCATAAAACAAAGGGTTATTTATTGGGTACAAAAGAAAAGAGCATAACTCGTGGAGTGCTTACATTGAGAAAAAACTTTTATAATAGTT
PRP19	YLL036C.line.71.chrXII.66745.68256_tile_1	YLL036C.line.71.chrXII.66745.68256_tile_1	Saccharomyces cerevisiae	R64-2-1	chrXII	66717	67150	+	ATTTAGGGTGTCAATGCAACAATATTGAAACTATCATTTGTCTTCAGAATAGCGGCAATACCACCATCTCCGCATACCACGTCCATATCAGTGAAATCGGCAGTGTCGCTTTGCAAACAGAGGGCGCTCTCCTCGTCTTTAGTCCAATTTTTTGTTTTCTTGTCAAATTTGTATATCGTCAGCGAATTGCTCTCGTTTGAGTATGCAATCATATTCTTTCCAGAGTCGTCAATGTCATAGGTAACGGTGCCCGTCTTGAATTCTGGGATTGTGTAAGTTGGATACGCTAGCGTGCCGACATCCTTTCTTAGGTCAAAGCAAACCACAGTTTGGTCACACTCTACTACCATCCAGTACCCATTGTCTGCAAATTTAACCTCTT
PRP19	YLL036C.line.71.chrXII.66745.68256_tile_2	YLL036C.line.71.chrXII.66745.68256_tile_2	Saccharomyces cerevisiae	R64-2-1	chrXII	67097	67531	-	AGGGCCTTGTAATCGTTTGCTACTACTATATCCAGGTAACCAAATAACTATATTGGACTCAAAAACAAACAAAGTCCTCAGAGAAATAGAGGTAGATTCCGCCAATGAGATTATATATATGTATGGTCACAACGAGGTCAACACAGAGTACTTCATCTGGGCGGATAATAGAGGAACCATAGGATTTCAATCCTACGAGGATGATTCCCAGTATATTGTTCATTCTGCTAAATCAGATGTTGAGTACAGCAGCGGTGTCCTACATAAGGATTCATTATTATTAGCCCTTTACTCTCCGGACGGTATATTAGACGTTTACAACTTGTCATCACCTGACCAGGCAAGCTCTAGATTCCCCGTAGATGAAGAAGCCAAGATAAA
PRP19	YLL036C.line.71.chrXII.66745.68256_tile_3	YLL036C.line.71.chrXII.66745.68256_tile_3	Saccharomyces cerevisiae	R64-2-1	chrXII	67477	67893	+	TCTGGAAATAATAGCTGGATGCTCTCCCCCGGTACGGGGATTTGGTGTAGTTATTGTGGTAATCGTTTTCGAATCTTTTAATTGGGTAAAATGTAAAGCACCATCCTCACAGCGACACATGCACACCCATTTATCATAGTACATAGATTTGTTAAGCTCTTTATATGGGAATGTTTTGATGTTACGGGAGTAATTTTGTGCCTGTAATAGCTCCAAATTTTTTAAAATCGGCCATTTGGGTGCTTTGAGCTTGCCCCTCGCTACAAAGTCTCTAGAAGATTGTAACAGCCCTTGTAAAAATTCTTCTCTCGTAATAGCTACCGCTTGCTGTGAGGATTTGGGTAAATCCTTCGAATCTTCGTT
PRP19	YLL036C.line.71.chrXII.66745.68256_tile_4	YLL036C.line.71.chrXII.66745.68256_tile_4	Saccharomyces cerevisiae	R64-2-1	chrXII	67839	68249	-	GGCCAGTTCTATCACCTAAATCCAGGACTATTTTTGAAAAGTCGCTCCTTGAACAGTATGTTAAAGATACGGGGAATGATCCGATAACAAATGAGCCCTTAAGCATCGAAGAAATAGTGGAAATCGTACCTAGTGCGCAACAAGCCTCACTAACAGAGTCTACAAACTCTGCTACGTTAAAAGCGAATTATTCGATTCCGAATCTGTTGACAAGTTTACAGAATGAATGGGATGCTATAATGCTCGAAAACTTTAAGTTACGATCAACTCTAGATAGTTTAACGAAAAAACTGTCGACTGTAATGTACGAAAGAGATGCTGCAAAGTTGGTCGCTGCGCAACTATTGATGGAAAAAA
PRP19	YLL036C.line.71.chrXII.66745.68256_tile_5	YLL036C.line.71.chrXII.66745.68256_tile_5	Saccharomyces cerevisiae	R64-2-1	chrXII	68195	68601	+	CTTCTAGGAACTTTCCCACTAATAGCACAAAGCATTGTTCCCTAGTTGGCTTTCTTGGCTATGTTTTGGTCTTTAATATTTCTTGGAAAGTTTGCATCTTTCTAAAATTGCCCTTACGAATTTTTCACCGCTGCTACCCGAAAAAGTACGAAATTTATCAACATGAAATTTATTCCTGCCAAGTCATCGAGTGCTCTGCGCCTAAGGCTTAGGTTGCATTTAAGTTGTCTTAATTCACGCTTATAGTGCAGGTAGTATAGGTTCCCCACTCCTGATCTTTCCCTTCTGAAATAAGGAAAGACTGCAGTTTAGTTTGGCAGAGAGAAGAAGATAATCATTTCTATTATATTCTA
PML1	YLR016C.line.72.chrXII.176802.177416_tile_1	YLR016C.line.72.chrXII.176802.177416_tile_1	Saccharomyces cerevisiae	R64-2-1	chrXII	176770	177171	+	TGGTTATACATTCATGAAGATGAGTTCGTAATCGTTATCTTCTTCAAATTCTGAAAGTGTAAGGACGTCACCACTTCGTAGCTCTATATATCTCGCTCCAGGAATTACAACGTTGTTCAAACATGTCCCATTGGACGAATCCAAATCCATTACATAACATTTCAAAATGCCACGAACGTTCCTGAACTGGATGACGCAGTGCTGCTTTGAGGATGTTTCTTCGGGTATACCAATGTCTGCGACAACGATCTCCGTTCTATCGTCGAGATCTGTATCCAGACTGTGGCCCAGTTCACGACCGACTAAATAACAGCTCCTGCCGTTCAAATCGTATCTTTTCCACGG
PML1	YLR016C.line.72.chrXII.176802.177416_tile_2	YLR016C.line.72.chrXII.176802.177416_tile_2	Saccharomyces cerevisiae	R64-2-1	chrXII	177116	177522	-	TACAATAGAAGCCTTGGTATAACGTAAAAGCCACAGCAAGCATGGTGTACTTCATTTCCGACTCCATTTGCGTATAGACATGTTTCACAGACGCAAAAGACCTTATAACACCAGAAATTATGGCCATGATGACAAGAAATTCAAATCGCAGTACATCGATATTATGCCAGACTTCAGCCCTTCCGGTCTGTTAGAGCTGGAGTCGAATAACAAAGAAGGTATAGCTTTAAAACATGTGGAGCCGCAGGACGCTATTTCTCCAGATAACTACATGGATATGCTAGGACTGGAGGCGCGAGATAGGACTATGTATGAACTAGTGATATACAGAAAGAATGACAAGGATAAAGGAC
U6	snR6.line.73.chrXII.366235.366346_tile_1	snR6.line.73.chrXII.366235.366346_tile_1	Saccharomyces cerevisiae	R64-2-1	chrXII	366187	366615	+	TTTTTTTCGCAACTATGTGTTCGCGAAGTAACCCTTCGTGGACATTTGGTCAATTTGAAACAATACAGAGATGATCAGCAGTTCCCCTGCATAAGGATGAACCGTTTTACAAAGAGATTTATTTCGTTTTTTTTTTATCATCGAGTGAAGTATCGTGACTTGTACATTTGAAGATACCCAGCGTACAGCAGTGTATCTTTATCTTCCTGTATGATATAGATAACTAACATCTCGAATAGAAAATTGTCTCGCGTTCGAACCTAAGCCTTTGCTATCGGTTGAACATAGAAGACCGCGTGATTCATTTTAGTGCGTAAGAATGCTATTAGTACTTATGTGCTTTATGAATGTGAATATTGTTACAGCTATGCA
MSL5	YLR116W.line.74.chrXII.380822.382252_tile_1	YLR116W.line.74.chrXII.380822.382252_tile_1	Saccharomyces cerevisiae	R64-2-1	chrXII	380790	381202	+	TGATGAGTTTTAGAAGGATTAACTCTAGATACTTTGAAAATAGAAAAGGAAGCAGTATGGAAGAAAAAAAAGCAAAGGTTCCTCCAAACGTCAACCTTTCGTTATGGAGAAAGAACACGGTAGAAAGCGATGTCCATCGATTCAATTCTCTTCCATCAAAAATTAGTGGGGCCCTAACTAGGGAACAAATATACTCCTATCAAGTCATGTTTAGGATTCAAGAAATTACCATCAAACTGCGTACGAACGATTTTGTGCCCCCCTCCAGGAAAAATAGGTCACCTTCTCCGCCACCAGTTTATGATGCCCAAGGTAAAAGAACGAATACCCGTGAGCAGAGGTATAGAAAGAAACTA
MSL5	YLR116W.line.74.chrXII.380822.382252_tile_2	YLR116W.line.74.chrXII.380822.382252_tile_2	Saccharomyces cerevisiae	R64-2-1	chrXII	381148	381583	-	CCGGAGATGTCACCGCTTTGATAACAATGTTTTGACAAACTTTTATACCTTTTTGGATCTTGTCTTCCGAGTCTGCGATAATTAAACAGTGCAAGGGGTCCTCAAAGTTCATGGCGCCTGGAGGTAAGTCACTTGCATTCTTACCTTCTTTGACTGAACCTCTTCCTCTAATTGCAATCTTACAATTCGAATCTTCTTGCAGCTTTCTTAACGTACGTCCACGAGGACCTAATAATAAACCAACAAAATTGACATCAGGATACTGATCCACCGGGATATAATACTTGTCCTGAAATTTGGTAGGTCTCTTGTAATCATCCGGAGGAACGAAGTAAGGGATGGTCTTTAGGGCTATCTCAACAAGTTTAATACGTTCATCCTCT
MSL5	YLR116W.line.74.chrXII.380822.382252_tile_3	YLR116W.line.74.chrXII.380822.382252_tile_3	Saccharomyces cerevisiae	R64-2-1	chrXII	381530	381936	+	GAAGGCCAGAATGACTTGAAACGAGGACAACTGAGAGAATTGGCGGAACTTAATGGTACTTTAAGAGAAGATAACAGGCCCTGTCCAATCTGTGGTTTAAAAGATCATAAAAGGTACGATTGTCCAAACAGAAAAATCCCAAATATACAGGGCATTGTTTGCAAAATATGTGGACAAACTGGACATTTCAGTAGAGACTGTAACTCATCGTCTCAAAGAATGAGCCGTTTTGACAGAAACGCCACGGTAAATAATTCTGCGCCAATACAGAGCAATGACGTACACTATAATAGCAATACTCATCCAATTCAAGCACCAAAAAGATCTCGTTATGACAATAACTCGACGGAACC
MSL5	YLR116W.line.74.chrXII.380822.382252_tile_4	YLR116W.line.74.chrXII.380822.382252_tile_4	Saccharomyces cerevisiae	R64-2-1	chrXII	381882	382320	-	ACAAATAAAAAAAAATGCAGATATTGTATAATGGGAGTGTATTATAATCCGGGAGGCCCTTGCAGTCCCGGAGGTGTAGGTTTGTTAATGTCATTGCCCATGTTATTAGAAAACCCTGGAGGACCGCTTAGGCCAGGAGGAGGTGCAATTGAGGATTGTACCGTAGTCATACCGGGAGGTGGAGGTAGCGAAAATTTCGGTTGTTCCGACTCTGGAGGGCTTTGTAATGGGGGAGGGGCGATTCCTGGAACTCCGGAACTAAAGCTACTTGATGTTAGGCCGGGAGGGGGTGTAGGCGTCACGTTTTGAGCTTGCCTCGAAATATGTGACGCAGGAGGTGAAGGTGATGGTGCATAACGTGAAGAAGCCGGAAATTTTAAAGGAG
CLF1	YLR117C.line.75.chrXII.382471.384534_tile_1	YLR117C.line.75.chrXII.382471.384534_tile_1	Saccharomyces cerevisiae	R64-2-1	chrXII	382439	382861	+	ATTCAAAGTGCCTGTTCCTGTTTCCATTTTTTGGCTAGTTCCAAGAACTTTGATGGTTTTGGCTTGTCATCATCGATATCATCAGGAAAAATGTAATCCACGAATTCTTCTTCCACACCGTTCTGTAACCTCACTTTTTTGATTACTTTAGGGAATCTTTTCTTGACGGTTTCTTGATCGAGTTCAGTACCGTAAGTTTCTTCATAGTCTTTTAGCGCTTCCAAAATAGACAGTCTCCCTTGTTTATCATCCTTCTCCTTGAAAAAAACTATCGCCTCTTCAAAAACTTTTCTTGCCTCCAATTTATTCTCATCGGTAATTTCAAACTCTATGTCTTCATCCACATTTTCGCTTTGCAGTTTTGCT
CLF1	YLR117C.line.75.chrXII.382471.384534_tile_2	YLR117C.line.75.chrXII.382471.384534_tile_2	Saccharomyces cerevisiae	R64-2-1	chrXII	382807	383243	-	TCAAAGGATATATCGAGTTGGAAGTGAAGTTGAAGGAATTTGATCGTGTGAGAAAAATATATGAGAAATTTATTGAATTTCAGCCCTCTGATCTACAAATTTGGTCACAATATGGAGAACTAGAAGAAAATTTAGGAGATTGGGATAGAGTAAGAGGTATATATACAATTGCACTAGATGAAAATTCTGATTTCTTAACAAAGGAGGCTAAAATTGTATTACTTCAAAAATACATAACATTTGAGACAGAATCACAAGAATTTGAAAAGGCAAGGAAGCTTTATAGAAGATATTTGGAGCTCAACCAATATTCCCCCCAAAGCTGGATCGAATTCGCCATGTATCAAACTTCAACCCCGACGGAGCAACAACTATTAGATTTA
CLF1	YLR117C.line.75.chrXII.382471.384534_tile_3	YLR117C.line.75.chrXII.382471.384534_tile_3	Saccharomyces cerevisiae	R64-2-1	chrXII	383189	383596	+	AAAGTTTTAGCCTTAGGACATAAACCGATTGCTTTACCCAAAATTTTTCTCGCCTTCGGTACATCATCATGTCGTATCAGAAATTTAGCATACATTAGCCATATTTTGGAAAAAGTGAAATGTTTATGAGGGATGATGTCGTCAATTAACCTCTGAAAAAGTTCTTCTTCTAAAAGCGAATTTTCCAATTCTAACTCAACATAGCATATATATCTCATCCACAGATAAATATACCTTTTCCACTGAACATTTTTTGATAGTTCTTTTGGTCGGCTGTCCACAATAGCTTTCTCGAAAGTTTGCATTATTTGTTTGGGGAAACTTTCTGAAATGAGATCCAAGTACAGCCACCA
CLF1	YLR117C.line.75.chrXII.382471.384534_tile_4	YLR117C.line.75.chrXII.382471.384534_tile_4	Saccharomyces cerevisiae	R64-2-1	chrXII	383541	383986	-	GTCATGGCTCACCCGCAAATGCAGACATGGCTAAAGTGGGTGAGGTTTGAAAATAGACATGGTAATACTGAATTTACGAGAAGTGTGTATTCTTTAGCGATAGACACAGTAGCTAACCTCCAAAATTTACAGATTTGGTCTGATATGGAGGTTGCAAAATTAGTAAATTCATTTGCTCATTGGGAAGCTGCGCAGCAAGAATACGAAAGATCTAGTGCTCTTTATCAAATTGCTATAGAAAAATGGCCCTCCAATCAATTGCTCAAGGCAGGACTGTTGGATTTTGAAAAGCAGTTTGGTGACATAAACTCAATAGAAGAAACTATTAGCTATAAAAGGAAAATGGAGTATGAAACAATATTGAGTAATAACGCCTATGATTATGACACCT
CLF1	YLR117C.line.75.chrXII.382471.384534_tile_5	YLR117C.line.75.chrXII.382471.384534_tile_5	Saccharomyces cerevisiae	R64-2-1	chrXII	383931	384373	+	CGTATTTTGAGTAAATCTCTCTTACACCGTTCCAGTTTTTCTGTCTTATTTCAAAATCCACGAAAGAATTCCATGCATTAACCCCTGGCTCCAAGGAGCACCATTTGGTGTACAGTGATCGTACAATTTCAACGTTGTTTAACGACTCTTCGACAATGAGATACTTGTACCATAACTTGTCTACTCTGGGCAACGTACTAATAGCTCTGTTCATAAGATTCCTAGCATGGTTAATACATTTGACTTTCAGCTCAGCATCAATGTATCGTATCCAAAGGGGGATGAATGAACTATCTACTAATAATGCTCTTTCAAAGATAGATCTGGCGCGCCTCATGTCGTGTTGTTCGATTTCGAATTGCGCATAACGAATCCATTGTCCCATATCC
CLF1	YLR117C.line.75.chrXII.382471.384534_tile_6	YLR117C.line.75.chrXII.382471.384534_tile_6	Saccharomyces cerevisiae	R64-2-1	chrXII	384319	384763	-	TTATCATCATAGCTCTTTTCCTAATATTGCGAGTTCAATTTAACCGCTATTATACTTGGTTAAATAATTTATATACATCCGTAAGACGCGATAGAAAATTAAAAACCTTGGTGCCAAATAGTTGGGGTGATGAGACTCATTGATTATGCAAGTTCATAATAGATAGACAAACTTGAGCTAAAAGTACTCTACTATTGCCAGCATGGACACTTTAGAGCCAACAGCCGTTGATACGCATGTTTCTGCGGAGCAGATTCTGCGGGATGTGTACAAGAAGGGGCAAAAAGCAAGAGGATCGACTAATATTGATATATTAGACTTGGAGGAACTTCGAGAGTATCAACGAAGGAAGAGAACAGAATATGAGGGTTATTTGAAGAGAAACCGACTG
USB1	YLR132C.line.76.chrXII.407283.408155_tile_1	YLR132C.line.76.chrXII.407283.408155_tile_1	Saccharomyces cerevisiae	R64-2-1	chrXII	407257	407662	+	ATTAGTTAAAAGGGATTCTAATGGAGTGACGGTTTTCATCACAATAGATAGAGTTAACTAAGAACTCTAGTTTGTATGCAAAGTCATTATTGAGTAGTAAAAGCGCCCCCATCGTCTCGTTTAATTGTTGATAACGTTTTAATGTGGCTTTTGAAGGGTTGCTAGCGATGGCAATTGAAACATGTAAATTTTGCCTACTTACAATTAAATCCTGATAGTTTGAAATGCCTGATTTCTGAAGTGCCTCAGCTATTATCGTTTTGAAAGGAGAAATTTGTGCCTTATTGGGACATTCTGAGACAGGGAGACCGAGGTACAAGGTGTTGGCTCGTTCTGATATATATAACTTCGGA
USB1	YLR132C.line.76.chrXII.407283.408155_tile_2	YLR132C.line.76.chrXII.407283.408155_tile_2	Saccharomyces cerevisiae	R64-2-1	chrXII	407607	408051	-	ACCTGCAATACCGGATTCAATTATATTGAAGTACCACATCCCTCCGAATTTACAAAAGTACGAGCACCAGGATATGAATATGAGTCGATTTTGGCGTTCGTTCACATATTTTGAGTGGCGTCCGACTCCAGCGATTCACCGACAACTTCAGAAAATCATATGTAAATATAAAGAAACATTTATGAAACAGGAATACACTAATCCGTATCAACTGGTGGATTTTGACCCGTTGTTCATCTCACACTTGGGAGCCCCCAAACCTTTACACGTTTCCTTAACTCGATCGTTGTTGTTTGAAACTGAAGAACAAAGACATGTTTTCATTCAAGAAATGCGTAATGGTTTACGAAATAATGAAATAACCCCTTTTAAACTTCAAATCTGCTCATAT
USB1	YLR132C.line.76.chrXII.407283.408155_tile_3	YLR132C.line.76.chrXII.407283.408155_tile_3	Saccharomyces cerevisiae	R64-2-1	chrXII	407997	408427	+	TAAATCAGTGGAATCGGCTTTCTGTATGCAAGTTTTCTCCGTGTATTCGATTTGGACCTCACTTTTGTTACTACTTTCGCTCTCGGTATCACTACCGTCACTGCTAGAATAGTCTGCAGATATGAATTCCATAGGCCAGTCTTCTTCTAAGCGATTGGTAACCTCCTTCACTTTAGAACACCACCAACAGATCGTTCTCTTGTTCTTTGTTCTTTATGGTATAATATTCACATGGTGCTCTACCGTTTTTCTTGTCGGCCCAGCCGGTTAAATCTCGAAGAGACAGAATAGAAGCTCTGTGGCTGTAAGTAAGGATAAGCCAAATGGAAAAGTTATAGAATTAGGACAACAATATACAGTTTTTTTTTGTACTCTTA
SMD3	YLR147C.line.77.chrXII.434158.434463_tile_1	YLR147C.line.77.chrXII.434158.434463_tile_1	Saccharomyces cerevisiae	R64-2-1	chrXII	434128	434577	+	TTATCACCTTCTCTTAGGTCCTCTTATTGGTGGCATAGGTCTTGATGAGTTTTTTTTGAATAATGGTGCATTCTTTAAGAGATCTGGAACAACGATAAATTTGATCTGTGACCCACGTACGAATATTTGATCCATGTGTGTTACAGCCCCCTGGGGCTCTGTAGCTATTACATCTCTTAGCTGTACGTTCATGCTATCTTCGCTTTCAACAAGTTTACCACGATAAGTCGCTCCCGTTGTTAGCTCCAGAGAAACGATATGTCCCTGTGCCTCATTTAATAATTTCACTGGTATTCCATTCATAGTCATTGTTTCTGATACGTGCCTCGCAGCGCTTTCTGATTCTCTTCGTATTGCTCTTATAAGAATTTTTTAACGATTTCAAAAATATCA
SMD2	YLR275W.line.78.chrXII.694378.694800_tile_1	YLR275W.line.78.chrXII.694378.694800_tile_1	Saccharomyces cerevisiae	R64-2-1	chrXII	694344	694780	+	TTATCATGTCGTATGTTTGATCTTAACCATTTTTACATCCTATAATTTGGAGTGAATTTTTATATACTAACTTAAAAGTAATTGATTTGTATCTTTCCAGTTCACAAATAATTGATCGTCCAAAACATGAACTCTCTAGAGCAGAATTAGAGGAACTAGAAGAATTTGAATTCAAACATGGTCCAATGTCCCTGATAAATGATGCTATGGTGACAAGAACACCTGTGATAATCTCATTAAGAAACAATCATAAAATAATAGCGAGAGTGAAAGCTTTCGACAGGCATTGTAATATGGTTTTAGAAAATGTGAAGGAGCTTTGGACAGAGAAGAAGGGCAAAAATGTAATTAATCGGGAAAGATTCATAAGTAAACTATTCT
SMD2	YLR275W.line.78.chrXII.694378.694800_tile_2	YLR275W.line.78.chrXII.694378.694800_tile_2	Saccharomyces cerevisiae	R64-2-1	chrXII	694724	695158	-	ATGCTAAGAAGCGCCATTCACATAAAAAGGGAAGAGTCAGTAAGCCAAAGAATGGTAAAGTAGACCCGTTGAAGAACTTCAAATGATTAATAATATTGATATTTATTCTATATTTTATGTAAAAATCTACTTATTAAAAATGCTCTTTAGTTAAATGTGATAATATAGATGCTTTATTCGTTTTCTTGAATATAATACTTTCGCAAGAGCTAGAAAATCAGCCAATAATAATTGGTCTTACTTCCAAAATAAAAAAAGGCTTTCCGCTGACTGTAAAGTTTCTTACGATGATTTGCTTTCCTTGTTGATTGAGGGCTGCTTGTCTTACTTTTTACTCAACAGGGGTTTTTAACACAACGATAACTGAATCACCTCTTAA
YHC1	YLR298C.line.79.chrXII.724721.725416_tile_1	YLR298C.line.79.chrXII.724721.725416_tile_1	Saccharomyces cerevisiae	R64-2-1	chrXII	724627	725027	+	TATCTCTATTGTTTTTTTTGGCAAAATATAGTCTACATATAATATTTAATAATCTAATCTGATAGCGTTAATTTCCATACCGCCTCCTTTTATATCCGTTGGCACTCGACGGTTTCCGTATGCCGTCGGAATGCATCCGCTTCTTGGACTCCTTGATCGTGGTTTGCAGTATATCTACACTGTAAAATATAGAAGTTTTTGGAATGGTGTTACTCCATTGTGATAATATCTTTGGGGGTTCTAGCTTCTTTGGGTTATTCAACCTAGGAAATGGATTGCTCTCGCACGTCTCATCTCTGGATCTTGAAGTTTGCTTGAAGGAATGGTGTGCAGATTTTTCATTGGCT
YHC1	YLR298C.line.79.chrXII.724721.725416_tile_2	YLR298C.line.79.chrXII.724721.725416_tile_2	Saccharomyces cerevisiae	R64-2-1	chrXII	724973	725421	-	ACTGTCATTCGTATTTGACCCATGACACGTTGAGCGTTCGTAAATCGCACTTGGTCGGTAAGAATCACCTTCGTATAACAGCTGACTATTATAGGAACAAAGCAAGAGACATTATTAATAAACATAATCATAAAAGACGCCACATTGGAAAAAGAGGCAGGAAAGAAAGAGAAAACAGTAGTCAAAATGAGACGCTAAAAGTTACATGCCTTTCAAATAAGGAGAAAAGACACATCATGCATGTGAAGAAAATGAACCAAAAAGAACTGGCACAAACCTCAATAGATACCTTGAAATTGTTATACGATGGCTCACCAGGATATTCCAAAGTATTTGTGGATGCTAACAGGTTTGATATAGGAGATTTGGTTAAAGCCAGCAAATTACCCCAAAGA
YHC1	YLR298C.line.79.chrXII.724721.725416_tile_3	YLR298C.line.79.chrXII.724721.725416_tile_3	Saccharomyces cerevisiae	R64-2-1	chrXII	725367	725771	+	TATTCACAATAGTATCTCGTCATTGCCTATCTCTTTCCTCTCCGTTACTTGAGCACCTTCATCGCCTACACTAGGAGCTCATATTATATCTTCAGTATAGCAAGAATATTTTCTGTTATCCTTAACGCTTACCCGCCTATGTACCTTGACACTTGCGGAAATCTAGTGTTCAATGATAAGGTACTGTGTGGAACATATGAAAGTGAAAAGAGTTTGAACCGTTTATTATCTCTATACAAGTGTCTCTATTCACATATAAAAGAGTGAAAATAAAAATAACTTTTAAGATTTTATTACCTACATGAGATTAGAAAAATCATAACTATATTACTCAGCGGCTGTGCCTGTTGT
CWC24	YLR323C.line.80.chrXII.778173.778952_tile_1	YLR323C.line.80.chrXII.778173.778952_tile_1	Saccharomyces cerevisiae	R64-2-1	chrXII	778145	778594	+	ATCAACTTTTCCTTTTATTTAGCATCTTCTGTAAGTCAGATGCTACTTTTGCACTGCCGTGGGTCTCCTTGTGGCATATAAAGCATTTGGTGCCCTTTTTCATATCTTTGGCAAAACACGATCCACAAAAATAATGGCCACAGTTTGTGACCACTGGAGACTTGTAATCTTCCTTACAAAGAGTGCACTTGAACGGTATCTTTTCCAAGTCTAGAGTAACCGCTTTGGAGTCCTCTTTATCCGCATTCCATTCTTGGTTCAGCTTCCAGCCAGTCTTGAAATCATCCCTCGAGTGTAAGAACTTGCAGCTATCTCCGTAACCACAGTATCCCGTCTGTTTGTAATCTTTGCAAACGTCGGGCTGAAAATCCATCAGCACCGTGGTCCGGATATTC
CWC24	YLR323C.line.80.chrXII.778173.778952_tile_2	YLR323C.line.80.chrXII.778173.778952_tile_2	Saccharomyces cerevisiae	R64-2-1	chrXII	778539	778983	-	ATTCATGTTCAGAAAGAGATTAGTGAACAAAAGCTCTTCTGATGAAAAGAACCAGAAAAAGAGGCAGAAAATTAATTTTAGCGAAGAGAAACTAGTGGCCAGCGATGAAGAAAAGGGTTCCAGTGACCTCATGAGCTTAGCCAAGAGTGGAAATAGCAGGACACTTCAACTTTCACATGAGAATGAAGGTAAACTACAGAAAAAGGGTGAGGATTTAGATAAATACACTTTAACGGTCAACGACGACAGCACTAAAGAAGATCTTCTAAACTTTGAGAGAAAAGAGCTGGCTGAGAAGGCAAAGAAGAGGCGACCTAGTGATGACAATGAGCTGGTACTGAACATGAGCGGTAAAAATAAACGCCTCACTAAACAGATTAACCAACCAACG
SPP382	YLR424W.line.81.chrXII.973395.975521_tile_1	YLR424W.line.81.chrXII.973395.975521_tile_1	Saccharomyces cerevisiae	R64-2-1	chrXII	973367	973771	+	AACATGGAGGATTCGGACTCCAACACAGATAAAAAGTTCTTTTTCAAAAAAAGAAGAATCGATTCCTATAATTATAGCGATGAGGAAGATAATAATTCAAGCATGAATAGTGACATGACATACACTAATGATGCCTTGAAAACTAGTAGCGGCAATGCCCCAACGATCTCAAAATTAACGAAGACATATGGTATTGGTGCGAAGTTACTTTCGAGTATGGGATATGTTGCGGGAAAAGGCCTTGGGAAGGATGGTTCTGGTATAACTACACCAATAGAAACCCAAAGCCGACCTATGCACAATGCAGGTCTAGGAATGTTTTCAAATACCAACTCCAGTAACTATCACAGTGA
SPP382	YLR424W.line.81.chrXII.973395.975521_tile_2	YLR424W.line.81.chrXII.973395.975521_tile_2	Saccharomyces cerevisiae	R64-2-1	chrXII	973717	974117	-	AAGAAGCCTCTCTTGTCCATAATATTCTTTGACTTGCACTTCTAACGGAGAGGTGCGCTGACGAATAGCTTCCAAACTTTTTTCAATACCCAGCAGCTCTTGCAATATCTCCACAACAACATCTTTTTTCGGCTTTGGTACTGCATTTAAAGGGTCTAATTCTTTTAGGATACTCTCTGGTAATTGTACCCCTGCTAACCTCAATTCTCTCAGTGTTCGCACTATAGTCATATCACCACTATCATTTAACAACGCTTCGCCTAAAACCTCCGTGGAGGTTTTATTGAATTTGACTTGTTCTATACCTTCAACCACCTCATCCTCAGAGCTCAAGTAATCCTCATTTT
SPP382	YLR424W.line.81.chrXII.973395.975521_tile_3	YLR424W.line.81.chrXII.973395.975521_tile_3	Saccharomyces cerevisiae	R64-2-1	chrXII	974063	974505	+	TTCTGAATTGGAGGTTACTTTGAGGGACGAAAGCAAGCATGTTTCCCTGTATGATAAGATTGGTGCTATTTTAAAATTGTCCGACGACGAGCTCATAGATAGGCTAACGTCCTGCTTATTGAGAAAAGAATTACTAATAGAATTTGATTTGGATCATTTAGAAAAGCCAAACGATATACTTGATGAGTTAACGCAAATTATAGAACTACTCGCATATAGAATGGATACAACTTCGAAATTTTTGAACAGGACACAAACAACAATCTTTAAAGTTATATATCCCAAACTCAAAAAATTTTGGGAAGGGTTTGATATGACTAAATCAAAAATCGACAGCGCTATCACCCTATTACTGGATTTCCAACAAGTGCTAAGTTTTATCGGGTGTA
SPP382	YLR424W.line.81.chrXII.973395.975521_tile_4	YLR424W.line.81.chrXII.973395.975521_tile_4	Saccharomyces cerevisiae	R64-2-1	chrXII	974451	974855	-	TAACTCGTAGATGGGGTCATTATGTCTTTCCCACAGCTCGTCCAGGAATTTAGGAAGAAACTCTTTACATAAAATTTTGTAATATCTTCGTTCGCAGATAAGTTCTTTGATAAATATAATATCAGAATTAGTGATACAAAATGATTCCCTATGGTACCAATTTTTACAATAAGCAAAAAATTTTGCTTCAATCTTGTCCACAATTGTGTCTTTGATCTTATCGTCAATTAAAACCATAAAATCCAAGACCCATATTCTTGGCGAAACATGGTCTACTTCATCGTGAAGTTCCCAATTATCTAATTCCTGTAATAGCTTTGGATAGACGAATTCCTCCATGATATGCTCTTT
SPP382	YLR424W.line.81.chrXII.973395.975521_tile_5	YLR424W.line.81.chrXII.973395.975521_tile_5	Saccharomyces cerevisiae	R64-2-1	chrXII	974801	975216	+	AGAGGATTGGAAGGAAAAACAGGAATGGAAAGAAAAAGATTCTGGATTTTTCTATTTTATGAAAAAACTGAGAAGTTATACCCATTATTTTCATCCAAAACAGTATGAATTGATGATGCGGGGAACCTTTAATAATATAAACAAAATACTCTATCAATGGCATCTTTATAGTACAGTGGAAGACTTACACAAGTCAAAGTGGTGGCTTAATTGGCTGATGAATACGGTATTTGAGCACTCTTTACCAACAGAAATAGAACTATCGGAGATCAGAAAAAGCTATAATATATTCGCTATGTCTCATAGGTACCACCTTGATAAATCTACATTAGATGAAGATTTCGATTTGAGACAGGGTTTA
SPP382	YLR424W.line.81.chrXII.973395.975521_tile_6	YLR424W.line.81.chrXII.973395.975521_tile_6	Saccharomyces cerevisiae	R64-2-1	chrXII	975161	975563	-	TTTTATAGGTACTTTCTAGAGGTCAAGGGCCCATAAATAAATTGGCTTAAAGGTCCCACTGGAATCCTCCACCCAAAGAATATCATGTTTCAAAGCAACTTCCATTTTTTTCTTCCCGTTTCGGATCTCAAATAAAGGAACTATACAATCTTGGTCTCTTCCATATGGCAGTTGAGTGTACCTATTTGGTATTTTGCTGATCAAGTACCCTTTTTCCAGGCAGTAGTCTTCTACCACATCCTTGAAAGAGCTGCTAACTTTTCCAAGCGGAATATTTTGTACAGTATAGGTAGGTTCTTGTTCGCTTTGACTAATATCGTCGATCACTTGTGTTTCCATTAAGTTTCGT
SEN1	YLR430W.line.82.chrXII.993434.1000129_tile_1	YLR430W.line.82.chrXII.993434.1000129_tile_1	Saccharomyces cerevisiae	R64-2-1	chrXII	993374	993798	+	ATATATATAAAAAAGCGCATCTGTTTATTATAAATGAATTCCAACAATCCTGATAATAATAATAGCAACAACATTAATAATAATAATAAGGATAAGGATATTGCCCCCAATAGCGATGTTCAGCTAGCTACCGTCTATACCAAGGCAAAGTCTTACATTCCTCAGATTGAACAAGTTTATCAAGGCACAAATCCAAATATTCAAGAGGCAAAATTATTAGGGGAGTTATTACAAGTTCTAGCAGAAGTTCCCAAGGGTACGCATTTATTTTGCGACCCCATACTTGAACCAATATCAATTTTTTCCCTAACCATTTTCTCATTCAATGAAGAAGCTACGGCCACATGGCTGAAGAATCATTTTAATCCAAT
SEN1	YLR430W.line.82.chrXII.993434.1000129_tile_2	YLR430W.line.82.chrXII.993434.1000129_tile_2	Saccharomyces cerevisiae	R64-2-1	chrXII	993744	994188	-	CCTTCACACCAGCAAAATATGACACCTGATATAAAGGTTTTTATGCTTAATGGATTCGTAACGTCCAACAAACGATGCTTTGTGTCGTAGAAAAATTTGAAGATTGCTTCGAAAGTAGCCTTAAGTTGCTTGTTAAGCCTCAACATATGCGGATTACAGAGACACTCGTACATTGCAGTTTCAATTTCATTTGTAATGTTAATTCCCGTATTATCGTTAACGGAAATATTTCTAAGAATAGGAAAAACAGCCTCCACCCTCCATTGGCATACGATGTCATTAAACTTGGCTACATGTTCATGCGGCACATGTCTTTGAATGGCAAAATGTTGTAACATTTTGCACTTCCCTCTCGCAAAATTTAGAATGCATTTATCACAAACAGAGAGAA
SEN1	YLR430W.line.82.chrXII.993434.1000129_tile_3	YLR430W.line.82.chrXII.993434.1000129_tile_3	Saccharomyces cerevisiae	R64-2-1	chrXII	994134	994582	+	GTTCAAAAGAGGAAAATGAGTGGTCACGAGCTTTTCTAAAGGATTTATACTCAAGAAATTTCCATATAAATCTTTCTAACCTGACACCGGATATTATTGAGGAAGTTTATATCCATATTTTATTCTTACAGAATCCGGCAAACTGGACAGAGATTGTGGTATCTCAATTCTGGTCGAGATTACTACCGGTTTTCAATTTATTTGATAAAGACGTCTTCATAGAGTACTTTCAGGTCCCAAAAAATGTGGAATCTTTAAAAAAAACATTCAAATTTCCGTTAGAGCCAATTTTTAAAATGTGGTACAATCACTTAAGCAAATCATATCATGATAAGCCACTAGACTTTTTGTTAAGAGGATTAACAATGTTCTTGAATAAATTTGGCTCCGAGTTT
SEN1	YLR430W.line.82.chrXII.993434.1000129_tile_4	YLR430W.line.82.chrXII.993434.1000129_tile_4	Saccharomyces cerevisiae	R64-2-1	chrXII	994528	994976	-	TAGTCAACAGTACTGTTTCAAATTCATCATTCTTATAAAGCATTGCCCTTTCATTTTCCTTAATAGTCAACACAGCCCTCAACAAGGCAGTTGCTGAATTCATTAAACAAGCTTTGGGAATGGATTTTAGGGATGGATAATTGGCTATTATACGCAGGAACGCCATTGAGACCTTTCTAACCATTTGAATTCTTTTGGATGGTGACAGTGCATGATAAAATGGTAAGGTCCAAGAAAGTAAATCGGTTACAGAACCGGTAAGTTGAAAGTAAACTTCTGTTTGATGCTCAACAATTGGATTGTCTTGAATTTTGATTAGTTTGATTGGGAATGAATCTCTATTGAAAATTATATCCAAAATGCTATGGAATGTGAAGGGTTCAATTTTGGACCAA
SEN1	YLR430W.line.82.chrXII.993434.1000129_tile_5	YLR430W.line.82.chrXII.993434.1000129_tile_5	Saccharomyces cerevisiae	R64-2-1	chrXII	994922	995339	+	AAAACAGATTCTAGAGCTTTGCTCAACAATCCTTTGATCCAAGACATAATAATTAGATCAGCTTCGAATCCTAACGACTTTTATCCTGGGCTAGGTGCTGCTTCTGCATCGGTGGCCACATCCACGATGATGGTATTGGCAGAATGTATCGATTTTGATATACTGTTATTATGTCATCGAACGTTTAAGCTTTATTCAGGTAAACCAATTAGCGAAATTCCAATTTCAACCAACGTCTTGGAAAATGTTACAAATAAAATTGACCTGAGATCTTTTCATGACGGTCCATTGCTGGCCAAACAGCTGCTAGTATCTTTAAAAAATATTAATGGTCTTTTGATAGTACCGTCAAATACTGCCGTAGC
SEN1	YLR430W.line.82.chrXII.993434.1000129_tile_6	YLR430W.line.82.chrXII.993434.1000129_tile_6	Saccharomyces cerevisiae	R64-2-1	chrXII	995286	995710	-	AATCGGGTCTACAAATGCACTCACTACGTCCATCAAAACACGAACAGCACGGGGGCAAGGCTCATAGAATTCACAATTGATTAATCTTTGTAGCATCACGTTTATATTCTTCAAGTTAACGGTCAAATTACTATTCAGAATCGCTAAGATACCTTCCAGTCTACCCTCAACGTCAAATGTATTGTATAAAATATTAGTAGCTGCTTGATACAAGTGTTTATCAGAGGAGAATATGCAGGACCAAAAACCCTGCGATGCATCTTCATCCGCAAGGATTTTAGACAGTTGACCGGGCAAAATATCCGCAAATTTTTCCATTAATCTCGTTGATAGCAGCAAAAACTTCTGATTCAATGCGTTGTGTGCCTCAG
SEN1	YLR430W.line.82.chrXII.993434.1000129_tile_7	YLR430W.line.82.chrXII.993434.1000129_tile_7	Saccharomyces cerevisiae	R64-2-1	chrXII	995656	996074	+	TTCTGGTGTGTTTGCTAATTTCCAAACTTTGAAGAGCCAAAATACCGAAAAGGAATTTTTAAAATTCTGGGAATCATGTTGGTTATTCTTGGATACGATTTATAAGTTTACTTTGAAATGGGCTTCTAAATATGACTATTCTGAACTGGAAAATTTCACCAAAGATACTTTAGATCTAAGTCGCTCTTTGGTGGACTCCTTTAGAGAATTTTCAGATATTCTTCATGACCAAACGAAAAATTTACTTCTCAACGTTTTAGAAACCTTTAAGAATATGTTGTATTGGCTGAGATTGAGCGACGAAGTACTTTTGGAATCTTGTGTTAGATTAATTATAAGCACGTCTGATTTAGCACATGAAAAGC
SEN1	YLR430W.line.82.chrXII.993434.1000129_tile_8	YLR430W.line.82.chrXII.993434.1000129_tile_8	Saccharomyces cerevisiae	R64-2-1	chrXII	996020	996420	-	ACTCTTGGTCTCCCAGTTATTGAAGAAGATAAAGCTTTTCTTTGTAAATAGTCTGCCCTGGATTCAGCAGAAGAACTAGCAATGGTTGAAGACAGAGAGGGCGAGAGGGATGGTGACGCCGGCACAGAATCCGTTAAGTCGATCACCTTCCCAAGTCTTGATAATTCCTTTTCTTTTCTGTAGTTTTCAGCTTCTGTAGCGACCTCTTCCGTGAGTGCTTTATTGAATATTTTAGCCTTTTGTAGAATCTCACTCGCCTGTTGCTCCGTCAACTTATTTGAAAATCTCTTTGCCTTCGAGGCGTACTTGGCCATCATTTCTACCAAGGAATCATCCACTTTCACATG
SEN1	YLR430W.line.82.chrXII.993434.1000129_tile_9	YLR430W.line.82.chrXII.993434.1000129_tile_9	Saccharomyces cerevisiae	R64-2-1	chrXII	996366	996780	+	TAGCTCAGCCTAAAATAACATCTTTTGGTACGTTCCAATCATCAGCTAATGCTAAACTGCATCGTACAAAACCTGTTAAGCCTTTATCCAAAATGGAATTAGCTAGGATGCAATTATTAAACAACAGAGTTGTTCATCCACCTAGTGCGCCAGCTTTCCATACAAAGAGTAGGGGTTTGTCTAACAAAAACGACGATAGCAGTAGTGAGGAGAGTGACAACGATATAGAAAGCGCTCGGGAGCTTTTTGCTATTGCTAAGGCAAAAGGCAAAGGAATACAAACTGTCGATATTAATGGTAAGGTTGTCAAGAGACAAACTGCGGCTGAATTGGCTAAACAGGAGTTAGAACATATGAGA
SEN1	YLR430W.line.82.chrXII.993434.1000129_tile_10	YLR430W.line.82.chrXII.993434.1000129_tile_10	Saccharomyces cerevisiae	R64-2-1	chrXII	996724	997146	-	TTGTCTGGTCGAAAATCGGGTAAATAAGCCATTACAATTAAGTCAGATTCAGAAATACCACAATCCTGTATGACTTGTTTAGCGACAGAGGCATACACATCATAGAAATCTGACACAGCAGTTCGATTTCCTACAATAATACTGAAAGGTTTATAGTCCTCTCTATCACGTGAAGAACATAGACCTTGCCAAGATTCTAGAAGTAGTAAAGGCTTCATGACTTTTTGGTAGTCAGCAGGAGAGTTGAAGAAATCCTTTACGTCAGAATAATTACCAATAGGCTCATCATCAGGATATTCACTATTTCTGGTGTAATCCCATTGCAATATGATTTCATATAGAGGGTTCATATCAACATTTAATCTCTTT
SEN1	YLR430W.line.82.chrXII.993434.1000129_tile_11	YLR430W.line.82.chrXII.993434.1000129_tile_11	Saccharomyces cerevisiae	R64-2-1	chrXII	997092	997511	+	AAAGGTTGTCCAGTGATGATTTCAAGAAAGCACAACATACATGTTTAGCAAAGGTGAGAACATTGAAAAATACCAAAGGTGGTAATGTTGATGTCACATTACGAATTCATAGAAATCATTCTTTCAGTAAATTTTTGACACTAAGATCAGAGATATATTGTGTGAAGGTTATGCAAATGACGACTATTGAAAGAGAGTATTCAACACTGGAAGGGCTGGAATACTATGACTTAGTTGGCCAAATTCTACAGGCTAAACCATCGCCTCCCGTAAATGTGGATGCGGCAGAAATTGAAACAGTTAAGAAAAGCTATAAGCTCAATACGTCGCAGGCTGAGGCCATCGTTAATTCGGTATCTAAAGAA
SEN1	YLR430W.line.82.chrXII.993434.1000129_tile_12	YLR430W.line.82.chrXII.993434.1000129_tile_12	Saccharomyces cerevisiae	R64-2-1	chrXII	997456	997866	-	TTCCTTTCACCTATCCTTTTATCCACAAGTTCTTCTAAAGTAAGGTCCTTAATTGCAACGTTTACAACGTCTGACCTACCTACACGGACCAATTGAGGTTTAAATTGATGCCCCTGCTTGTCATACACTCCACTCTTCAGTCTGAGGCAGATTTCGTCCACAGCGGCATTACTGGGGGCACAGATTAGAATTTTTTGCTTTTTTAACAGTTGTTCAGTATTCGATGAGTTCTTTTCTAGTGGCACTTTGATGACATTTGAAGATGAGGCATTCTTTGTAGACAAAAAGTAACCAATAATACCCAGTATAGTCTTTGTTTTACCCGTACCAGGTGGACCCTGAATTAAAGAAAAACCT
SEN1	YLR430W.line.82.chrXII.993434.1000129_tile_13	YLR430W.line.82.chrXII.993434.1000129_tile_13	Saccharomyces cerevisiae	R64-2-1	chrXII	997812	998258	+	ATTACGAAATCAGAACAGATCCGGAACTAGAACGTAAATTTAATAATGCTGTGACTAAAAGAAGAGAATTGAGAGGAAAATTAGACTCTGAGAGTGGTAATCCAGAAAGTCCAATGTCAACCGAAGATATCAGTAAATTACAACTTAAGATTAGGGAGCTAAGTAAAATAATCAATGAACTTGGCCGTGATAGGGACGAAATGCGTGAGAAGAATTCCGTAAATTATAGGAATAGGGATTTGGATAGAAGGAATGCACAGGCCCATATCTTGGCGGTTAGTGACATCATATGTTCGACTTTATCTGGTTCAGCCCATGATGTACTCGCAACAATGGGTATTAAATTTGATACGGTCATTATAGATGAAGCATGTCAATGTACCGAACTTTCTT
SEN1	YLR430W.line.82.chrXII.993434.1000129_tile_14	YLR430W.line.82.chrXII.993434.1000129_tile_14	Saccharomyces cerevisiae	R64-2-1	chrXII	998204	998608	-	ATAAGACATAGTCTTCGCATTTTGTTCTTGCCTACCACTAATGATGTCAAAAAATTTGTAGGGAGCTAATGGCTCAAGCTGGTGCCAGGGTCTTTTGTTCAAGATATCCATACCAGGGCCGTCTTTTAGTCGTCCCTGATAAAATTCAGAAGAGGGGAATTTACTGATGGAAGGATGCATACGGTATTGAACATCCAGCAAGTATGGGGAGCTATTTTTCTCCATTCTAACGAACAGTGACTGATTGTATTTAAAATTGCTTGCTGCACCTGAAAGAACAGTTGGTGGTAGTTGGTTAGGATCACCAACCATAATACAACGCTTCCCTCCATACCTGAGAGGAATAATTGA
SEN1	YLR430W.line.82.chrXII.993434.1000129_tile_15	YLR430W.line.82.chrXII.993434.1000129_tile_15	Saccharomyces cerevisiae	R64-2-1	chrXII	998554	998953	+	TACAAATATGGAGGAAATACGTGTTGCCATTGAGTTAGTTGACTACCTTTTCAGAAAATTCGATAATAAAATTGATTTCACGGGAAAAATCGGTATAATTTCACCTTATAGAGAGCAAATGCAAAAAATGCGTAAAGAGTTTGCCCGCTATTTTGGAGGCATGATCAACAAATCAATCGATTTCAATACAATCGACGGTTTCCAAGGTCAAGAAAAAGAAATCATCTTGATATCGTGTGTCCGTGCCGATGATACGAAATCTAGTGTCGGTTTTTTAAAGGACTTTCGTCGTATGAATGTGGCTCTGACTAGAGCCAAGACAAGTATTTGGGTTTTGGGACATCA
SEN1	YLR430W.line.82.chrXII.993434.1000129_tile_16	YLR430W.line.82.chrXII.993434.1000129_tile_16	Saccharomyces cerevisiae	R64-2-1	chrXII	998898	999316	-	GGGCGATTCTGCCTTCTTGTTATTCTTTTTCTTATCATCTGCCTTGGACTTTTTCTTTTCCTTCTTCTTCTCTTTCTTCTTTTTCTTTACAGCTTTATCTGCCTCTTCACCTTCATCGACAACTCTTCTCTTCTTTGTGTCCTTATTGGATTTTACCTCATCGGGGCCTTGCGTAATATATTCCATGGGTAGCTTATAATCATCTTCTTGCTCTGATGGTACGGGTACATTGAACTTTCTTAAAATACTTTGAGCTCTATTATTTCTGGGATCCAGGAAACCCGAGCAAGCATATGCAAGACAACTTCTATCTTTTGCATCTTCAATCAAATCTCTCCATAACTTGCTTTTAGCCAGAGACCTTT
SEN1	YLR430W.line.82.chrXII.993434.1000129_tile_17	YLR430W.line.82.chrXII.993434.1000129_tile_17	Saccharomyces cerevisiae	R64-2-1	chrXII	999262	999666	+	CAGCACCTCATCTGGTACAAAGAAAAAGTCATCCATTTTTGGTGGAATGAGTGTACCGAGTGCCGTAGTTCCTAAAACTTTTCCTGATGTGGACAGCAACAAAAAGGCAGCAGCAGTTGTTGGTAAAAAGAAAAATAACAAACACGTTTGTTTTTCGGATGATGTTAGTTTCATACCAAGAAATGACGAACCTGAAATTAAAGTGACCAGAAGTTTATCCTCTGTATTGAAGGAAAAGCAGTTAGGTTTGAAGGAGACGAGAACAATTTCTCCGCCTGAAATCAGTAATAATGAGGATGATGATGACGAAGATGATTATACGCCGTCAATCTCCGATTCTTCATTAATGAA
SEN1	YLR430W.line.82.chrXII.993434.1000129_tile_18	YLR430W.line.82.chrXII.993434.1000129_tile_18	Saccharomyces cerevisiae	R64-2-1	chrXII	999612	1000038	-	TGCGGATGGGGGTTTAAATCATATGGATCTTCTGCCTCAGCAGGATAGCTGTCTTGCGGATGGGCGGGCAGAGTTTCATGCAGTTCGCCTGTACCCACAGGAGCCGTTGAGTATTGATTCGCATTACCCACATGTTGAGAGAGGGTCCTATTTGCTCCATTCTGTCCATTTTGATTGGGTTCACCGTAATCGGAAGCAGTCAGGATCCTCGAAGAACCACCGGATAAAACACTATTTGAACTTCTGTGTTTTGTAATAGCAGCAGGTACCTGCGTCTGCTTTGCTTGCGAAACTTGTGGATCGTCGTATATACTAGCGCTGAAATTTTGGTTATGAGAAGCCACCCTGTTGTTACGACCATTTGCTTCACTTT
SEN1	YLR430W.line.82.chrXII.993434.1000129_tile_19	YLR430W.line.82.chrXII.993434.1000129_tile_19	Saccharomyces cerevisiae	R64-2-1	chrXII	999984	1000404	+	AACCACAATCTTCAGCATTCAAAGGACCTGGTAGTGGGCCCACAGGCACACGCAACAGTTCGAGACGGAATGCTTCATCTAGCCCATTTATCCCAAAAAAAAGAAAGCCTAGATCATGATCTTGAAGTAAAAGTGTTAGGAATTATACCTGCATATATATTGGTGTATACATTTATATTGAATTTAATAGCAACATTATTTTTCATTATTTTTCATTATTTCAGCAAAAAGAACATTTTTTTTCAATTTGACGTGAAAGAGTTTGACTATTACGTGGGCATACAATGTTTAAATTTACATTATCCTCATGGCTACTCTAGCTATTTGCATTTCATTCAACTTTTTTTGATATGGCATCATTTTTATT
LSM3	YLR438C-A.line.83.chrXII.1013909.1014178_tile_1	YLR438C-A.line.83.chrXII.1013909.1014178_tile_1	Saccharomyces cerevisiae	R64-2-1	chrXII	1013879	1014287	+	TTGCTTATATCTCCACTGCGCCATCGTCATCTTCAGAGGGCGTGCTGATTAGAGTCACTGTGTCTCCTCTGATGAACACCATTTCACATCGTCTTTCGGACTCACTCAACTCCTCGTTGTTTAATTGGTATATGGTCTCTACTGCATCACTCAGCACGATGTTGCAGTGTGAGTCGAACGCTTGCAGTGTGCCCACCAGCGTCCTGGCCCCGCGCAGCTTGATGTACACCCTCTCATCGAGATTGAGTTTCAATAAATCCAAAGGTGTCTCCATTTTCTTGAGTGTGCGTGATGTTGTGTGTGTGTGTGTATTTATCTGCGTGTCTCTCCCCTGTTGTATTGGTTGCTAGAATGGA
RSE1	YML049C.line.84.chrXIII.174220.178305_tile_1	YML049C.line.84.chrXIII.174220.178305_tile_1	Saccharomyces cerevisiae	R64-2-1	chrXIII	174186	174608	+	ATCATTACATGTAATTTGTTCTGACTTCGTTGATTGTTTGAATTATATCCTCCACTTGTACACTCTTTAAATTTTTGGCCAAAAATTCCTGCTCATTCAAGGAAAGTCTCAGGAAATTTTCACATAAATCACCATCAATAACTTTACGTACAGGGGCATAATAGCTTCTGTATTCTTGGTGGTCTCTACCTAAAATGGAACAGGAACCCTCACATATTATTTCATCCTCTATACCATGCCGTCCTTGTAACACAACACTTCCAGATTCCTCTTCATCGTCTTCCTTACGCATATTGTTATTCTTCTTTCTTGATTCATAATCTAAATAAAACGTATCATCCGCCTCAGCCATTATATTCTCAATGT
RSE1	YML049C.line.84.chrXIII.174220.178305_tile_2	YML049C.line.84.chrXIII.174220.178305_tile_2	Saccharomyces cerevisiae	R64-2-1	chrXIII	174554	175002	-	GATGACTCTGTAAAACGCCATGTGACGGTATTGAAATTTCTAGATGAGGCAACTGTTATAGGCGCTGATAGATATGGAAATGCGTGGACTTTAAGGTCTCCACCAGAGTGCGAAAAAATCATGTCAAATCATGATCCCAGCGAATTATCTAATGGGGCCATCAAGTACCCACTAGACGTCATCACTTTACAGCAGAAATTACCCAATACTTATGATTGCAAGTTCAAGTTTCAACTACTGAACCACTTCTTTGTTAATGATATCATCACTGATTTCCATATCCTGGACAGCCTTTCAAATTCTGATAGACCTGGTTGTATCTATATGGGCTTACAAGGAACCGTGGGATGCTTTATCCCCTTATTATCCAAGGGGAATGTTTTTATGATGGGAAA
RSE1	YML049C.line.84.chrXIII.174220.178305_tile_3	YML049C.line.84.chrXIII.174220.178305_tile_3	Saccharomyces cerevisiae	R64-2-1	chrXIII	174948	175364	+	CTACGTACGGAATAAATACATTCCCCGCAGGATCCCAGATAAATAAAGTGACAGATTCATGTATATCACCAACGGCCAGTCTTTCATAATTCCACTGGTGCATAGACACAATTTTTGTTATGGATACCGGGGTCTGTGTTACGGACCTTCTTAATAATTGCTTTTTCCCCAAACCATAAAGGACAATAGTGGAGCCCATGGCTGTCAGCAAGAAGTTTTTAAACTTCAACATAGCATGTATTGGTGAAATGATTTCTGTTTGGTGAAGTAATTCAATATCAAAAGATAGTTTATCTTTGTTAACTAATATCTTGTATGTTAACAGCCTTTTGTCGCCAGCACAAATGATCAAATGATCAGCTT
RSE1	YML049C.line.84.chrXIII.174220.178305_tile_4	YML049C.line.84.chrXIII.174220.178305_tile_4	Saccharomyces cerevisiae	R64-2-1	chrXIII	175310	175752	-	GGTGTTTGTTCAATATCGAGCTCAGGACGCTTAAATATTGGCAGAGTTTCCAACTTTCCAACTTTGGATAACTGGTTTCACGTTCATGAATCAAGTGTTAACAAGCAAGAGAACGGTGGAGGAGATGAAAGCAATGAAGAGGAAGAAGATGAAATGGAAGAAGAAATGGAAATGTTACAAATATCTACATTCCGACCTCGTACTATTTTATCATTTCCCAATAATCCGAAAAGCATTTTGTTTATTGATAATCACAGTGGTAAGAAACAATGCCGTATATCACTGCAAATTGATGGTGAATGCTTAAAGTTTGGCAGTTCGGATCATTTATACAAGATACTGGACGATATCGATTGCGTTTCCGCTGCTATAATAGATTTCACAAGACA
RSE1	YML049C.line.84.chrXIII.174220.178305_tile_5	YML049C.line.84.chrXIII.174220.178305_tile_5	Saccharomyces cerevisiae	R64-2-1	chrXIII	175698	176141	+	CGTTGATTGCAACATCTGCGTTAACAAATTTGGAACAACTTAGCATGTTTTGATCCTTTAACTGCCGTATGGTCCACACATTTTTCCACGTGTAGCTTACCCATGTAGAAGAGGAATGGCAAACCACGCATGACATCCATTTAGCTCCACTACTATTTATTTCTTCTTCTTCTTTTTCATCATCATCGTCTTCTTCTTCTTCTTCTTCTTCCTCATTATTTAGTGATACAGATATCTCACGCAAATACGAAAGGGAAACAGGCTTCAAGCCAAGGAATCGCCTTTTTATGTCAGTGAACGATCCGTCAACATCCCCTATATGAAATTTCATGTAAACGCCATTTTCTAAACCTACATGCAAATTAAGCTGTCCTATTGAGGAATCTCTA
RSE1	YML049C.line.84.chrXIII.174220.178305_tile_6	YML049C.line.84.chrXIII.174220.178305_tile_6	Saccharomyces cerevisiae	R64-2-1	chrXIII	176086	176530	-	AGTATGCACCGCAGAACTAAGACATATCGTACCGACTGGTAAATCTAGGTATTCTAATAAGCTGACTTGGGTGCCACCAGCGGGAATTCGTATTGTATGTGCCACGTCCTCGAAAACACAACTAATTATATCATTATCAAATTACGAATTGGTTTATTTCAAGATAGATGTATCTTCGGATTCGTTAATCGAATTAACCACCCACCCAGAATTGGACACAATGCCCTCTAAAGTTGCGATTGTGCAAGATACGCAGCATGCTGATTTATTAGCCATTGCTGACAATGAGGGTATGATCAAAATAATGTCTCTTAAAGACCAAAAGGAAGATTTTTTAACTGTAATAAGTTTGCAATTAGTTAGTGAAAAGATTTCTGACATGATAATGGTT
RSE1	YML049C.line.84.chrXIII.174220.178305_tile_7	YML049C.line.84.chrXIII.174220.178305_tile_7	Saccharomyces cerevisiae	R64-2-1	chrXIII	176476	176918	+	TTGGATAATAGAGTGTGAGCCCATTAGGCATGTATGAATTGTTGTGTCCTGAGAGAGCTTGAAAGCTGAACGCGTTGCTTCATCCGGTGTTAGTTCCTCCATGGACTCGTTGTCAATTTGTAGTATCATAGTTTTCTTGGGAAAAGTTATGAACAAAAGAGTATTGTTATCGCCGGTTGTTGCAGGATCGGGTATTAGCCATAACTTGGTTGCGTTCGGGGGTAAACTAGTAGATATCAAATTAGAGTAATTCACAGCATTTGTTAAAGTTATTATCTTGTTGTTTGTAAAATGTTTAGTGGCGATAGACAGTGGCGAATCACTGACAATTTGAGATTTTATTGAAGGGTTCAAATTCAATTGTTGCGATAATATGCTCAAATTCTGCA
RSE1	YML049C.line.84.chrXIII.174220.178305_tile_8	YML049C.line.84.chrXIII.174220.178305_tile_8	Saccharomyces cerevisiae	R64-2-1	chrXIII	176864	177292	-	AGTGGAAATACCCAAAAGATCTATCACAAATAGCCGTCATAAAAATGTAACAATCATATCAGGCATAGTGCAGAAATTGAAAAATGATTTTTTCGTACTTTTACAATCTAACCATGGCGATCTTTTTAAGTTAACTGTAAGTCCAGACACTAATGATAGAAATAGACCTTTAGTTCAATTGTCCTACTTTGATACAATCCAAAATTCACACCAATTACACATTTTCAAAAACGGTTATCTTTTTGCACTATCTGAAATGAATAACAACTTTCTTTTCCAGTTTGAGAAACTTGGTGTAGAGAAAAATGATTTTTCTAATGTTTTAACCTCAAAAGATCCAAATAAGTCGCTAGTTTTCGAACCATCCATAAAGTT
RSE1	YML049C.line.84.chrXIII.174220.178305_tile_9	YML049C.line.84.chrXIII.174220.178305_tile_9	Saccharomyces cerevisiae	R64-2-1	chrXIII	177238	177640	+	TTTCAGGCTGAAAAATCCGTTCATATCCTTTACCAGAATATGATTTTCGAAGCCTATGACAACAAAAGGGTTGAAAAGGGTATCATAGTCAGCATCATAGTTGTTGTCGCTTAGCGAAGTTGTTATATTATATCGCGATAGATCTGGCAAACTCAGTACGAAATTGGCAGATGGGTTAACTAAATAATCTGCCTTCTTGACGATGTGATTCAAACCCAACTCGAGGACATAAAATATCAAGTGTACTGATAGTTGAGTAGCGGCATTGTCGATTTCTAAGGTAACAAAACATGGATTATTGAAATTTACATCAACAACTGCCATATCCAGCGTTACCATATGGGGTCTG
RSE1	YML049C.line.84.chrXIII.174220.178305_tile_10	YML049C.line.84.chrXIII.174220.178305_tile_10	Saccharomyces cerevisiae	R64-2-1	chrXIII	177586	177986	-	AGTTTCAAAACCTGTTTGCGACGATAACCTCGATGAAGTCGCTGGATCTGCCGCATTCAGGGTCAAGGGCAAAAGCTTCCAACTGGCCCACTTTTCTAGCGCTAACTTCCGATTCTGGTAACCTAAGTATCGTGCAAATCATTATGCATGCAGGTGCTCTTAGACTTAAGACTTTAGTGAACCAGCCATTGACGAGGACCACCCTTCGAAGAGTCTCTCCCATATCATACATGGAAATTGACCCTAATGGGCGTTGTATCATTCTCTCATCTGTCGAACAAAATAAATTGTGTTTCCTCGTTGATTATGCTCAAAAATTGAGGATTTCGTCTCCATTGGAAATCATC
RSE1	YML049C.line.84.chrXIII.174220.178305_tile_11	YML049C.line.84.chrXIII.174220.178305_tile_11	Saccharomyces cerevisiae	R64-2-1	chrXIII	177932	178380	+	TTGGCAATAAGCTTTAGTTCCCCATCTGCAGTATCATAAAGTTCTAAATGCGTCTCAGTAGCTACGCACAATTGCGACTGCTCACGCTTGGACCCTGCTTCCAGATCGACGAAGTGTCCGATGCAGGAGTGCACGAAATTCGTCTGTTTCTTTAAAGTAAGATGGTACAAGTATAGCTCATCATCTTTAGCAACCATTGTTATGTTATGGTCACTCCTTGTTCTTCTTTCAGCCTCTCGTTTTAAACCGTCATAAGCCATCGTTGTGCTAGCTTGCCCAAATAGTTTACGCATCTTCGCCGTGTGGGGCGACAAGCTTACTACTGCCATTTTGCCACCTCCCCACATTTAATGATGGAAAATATTATAAAAAAGCGAGAAAAGAAGCTAATGGTG
PRP39	YML046W.line.85.chrXIII.181474.183363_tile_1	YML046W.line.85.chrXIII.181474.183363_tile_1	Saccharomyces cerevisiae	R64-2-1	chrXIII	181444	181888	+	TTATGCCAGATGAAACAAATTTTACAATAGAAGATATTGAGCCTAGGCCTGATGCCCTTCGAGGTTTGGACACCCAGTTCCTTCAAGACAACACAGCATTAGTACAAGCATATCGTGGTTTAGACTGGTCAGATATTTCTTCGTTGACCCAAATGGTAGATGTTATAGAGCAAACAGTGGTTAAATATGGCAATCCAAATGATTCAATCAAATTGGCCTTGGAAACTATTTTATGGCAAATATTGCGTAAGTACCCTTTATTGTTTGGATTTTGGAAGAGGTTTGCTACTATTGAGTACCAGTTATTTGGTCTCAAGAAATCGATTGCTGTTCTGGCCACCTCGGTCAAATGGTTCCCAACTTCTCTGGAGTTATGGTGTGATTATTTGA
PRP39	YML046W.line.85.chrXIII.181474.183363_tile_2	YML046W.line.85.chrXIII.181474.183363_tile_2	Saccharomyces cerevisiae	R64-2-1	chrXIII	181834	182234	-	AGGTTGAAGAAGGGCTGTTTGATTTTCGATTCGAACTGCCAAATTTCATTTACTGTTGTTTGTGTTTTTCGTAAAACTATATCAATATTCCTTGTTGTCTTCAAATTTTTTTCATTTAAAAACTTCTTGTAAGATGTGAAAAACCGCGCATACTGATGTAGAGGAACTTCAATAATGTACTCGTATATTCTTTGAACGTTATGCCAATTCTTCTGCCCAACTTCAAATTCTATAAACTTGTCCCAAAAAGGGTGTGATAGAAACTGCTTGCCAATAAGATCCTTTGCAATTTCAAAATTATTCCTAATAAAATCCGTTTCGTTCGGGTTATTAACACACAACACATT
PRP39	YML046W.line.85.chrXIII.181474.183363_tile_3	YML046W.line.85.chrXIII.181474.183363_tile_3	Saccharomyces cerevisiae	R64-2-1	chrXIII	182180	182590	+	TGGGCCAAGTGTTAAATGATGATTTGGAAAATTGGTCGCGATATTTAAAATTTGTGACGGATCCTTCAAAATCCTTGGATAAAGAATTCGTAATGTCCGTTTTTGACAGATGTTTGATTCCTTGTCTTTACCATGAAAATACGTGGATGATGTATATTAAGTGGCTAACAAAGAAAAATATATCCGATGAAGTGGTAGTGGATATATACCAAAAAGCCAATACGTTCTTACCACTGGATTTCAAAACTTTGAGGTATGATTTTCTTAGGTTTTTGAAAAGAAAATATCGGTCAAATAATACCTTATTCAATAACATATTCAATGAGACAGTATCGCGTTATTTAAAGATTTGGCCCA
PRP39	YML046W.line.85.chrXIII.181474.183363_tile_4	YML046W.line.85.chrXIII.181474.183363_tile_4	Saccharomyces cerevisiae	R64-2-1	chrXIII	182536	182964	-	ATTCAGCTTGGTAAAATTTACATTACTCTTTTCAAATTTGTAGTAAGTTAACCAGAACGGTACAGAATTTTTAATGAGGATGTTTTTTTGATAAAGGTTGAAATATTTCCTTGTTTGCATATTATTTTTAAGTACAAGCCATGTAGTTTTTATCAATTCTACCACGACTATGCTTAAGTTTTTATCATTTATTAAGGTCTGTAAATGCACCTTGGCATCAATTTGATTATTGATGTAGTTGGTGATTGATGTCTCTAGGATTTTAGTAAACGATGTTTGTTTCTCTAGAATTTCCTTTGGCGATTGATCTAAGGAATTCTTAAAAGAATGTCTTTTCAACATACAAAGGTACTCCGTCATAAGTAATATGTCGTT
PRP39	YML046W.line.85.chrXIII.181474.183363_tile_5	YML046W.line.85.chrXIII.181474.183363_tile_5	Saccharomyces cerevisiae	R64-2-1	chrXIII	182908	183318	+	TAAATTCATTAGGGAGCTTGGGGTAGAAATATACTTGCCGACTACAGTAATGAATGATATTTTGACGGATTATAAGACTTTCTATTTAACTCATTCAAATATCGTCACGTATGAATCCTCCATTATAGATTCAAATACATTTGACCCTATCTTGTACCCTGAGCTGAAAATGTCGAATCCAAAATACGATCCAGTATTAAATACTACAGCAAATGTAGATTGGCATAAAAAGACGGAATGGAAGGAGGCTGGTCACATCGGCATAACGACAGAAAGACCGCAGATATCCAACAGTATAATTGAGTGCAATTCAGGAACTTTGATTCAAAAGCCCATCAGTTTGCCTAATTTTAGA
PRP39	YML046W.line.85.chrXIII.181474.183363_tile_6	YML046W.line.85.chrXIII.181474.183363_tile_6	Saccharomyces cerevisiae	R64-2-1	chrXIII	183264	183670	-	TAATAGAATCTTACCAACCTCTAATGTTTTTTGAATATATTTTAATTTAACAGGTTCAATAGTTACTTTTTTATTATAAATAATAACTTAAAATATTACATAAACTATTATTTATATTATCATACAATAATTTATTATATAATTATTTATTAACTCTACCAATATAGAATAAAACATTTTCAATAATAAATTATAAACAAGTAAATATTTGGGTACTCCTTCGGGGTCCGGCCGAGTAAATTATTATTTTAAATATAATTTATGATTTATGATTAATTTCATTTACCTTCCTTAAGAAATTCTTCAGTGTATAGATCATTAATCTTGACCTGATTAATTTTCTCCAAGTTT
STO1	YMR125W.line.86.chrXIII.517539.520446_tile_1	YMR125W.line.86.chrXIII.517539.520446_tile_1	Saccharomyces cerevisiae	R64-2-1	chrXIII	517507	517929	+	AAGATGTTTAATAGAAAAAGAAGAGGAGGTATGTTTTAAAACCAATGTTTTCCAGAAGTTTCGTTCTAGAGTGTGTATATCAAGACCAATTAGGATGGTATTTCCATTTTTTGTCAGTTAGTACGGTGTGACAGAAAAGTGTACTTTTGTGGCACAGAGAAGTGGAGAAACGGTACACGTAGAATACATAACGGCAAGTAACCTCTCTTATTTTACTCTCCATCTTTACTTTGTTTTACATTCCTAGGATTATTAGGTTAGCTTGGTTTTACAAAAACTCAATTATTCAGTTTCATTCAAATTACTAACATACCCAACTTTGACTACCTTGCATATGATTTTACCGTTAGACTTCGATGAAGATGAA
STO1	YMR125W.line.86.chrXIII.517539.520446_tile_2	YMR125W.line.86.chrXIII.517539.520446_tile_2	Saccharomyces cerevisiae	R64-2-1	chrXIII	517875	518287	-	ATTCATCATTATATGTTTGCTTGCACCATTTTTGTAATTCTTCGAAGAAGTAATTGATAATACTCTTTCCGGCAACATTATTTTTCGAATTAACAACCATGGTTAAGAGAGCGATAGCAGCTTGCTTCTGTGGTTGCTCCACAACAACAGCGTTTAAAGTGCTCAGTAAAGCATTATTAAAGTAGTCCTCATGGCCATACTCATTCATTATAGCTTCACTCAAGAATTTGATATCATCTTCAAAAGCTTTAACAGATTCACCAATAGTGCGAATATCGGGCATCATTTCTTTACACAGTTGTACAACAGGTGGGATTCTCTGTCTTTTAGGCATGCGAGGCCTAAAATCACGGTAATTT
STO1	YMR125W.line.86.chrXIII.517539.520446_tile_3	YMR125W.line.86.chrXIII.517539.520446_tile_3	Saccharomyces cerevisiae	R64-2-1	chrXIII	518233	518635	+	TTCAAGAGTACGTCAAATGAAACTGGGCCATGGAACAAGATCAAGTTAATCCTGAGATTTTTATCCATTCTATCGCCCATGTTTTTAGTTGATGAACTAATCAATATCTACAAGAGCTTATTTGAATTGAGTATCGAATTAAACAATCTGGATCCAGGTAACAGAGTTCCTTTATCTGAAGCAATTTACACCAATACATTATTAAATATCCCGTATTTGTTCTTTTTTAATAGGAATAATGACGGTTTGAGGACAAAAGTGGAGGAGTTACTTGCATACGTTGAACAAAACTATCTAGTTAAAACAACGGATATAAACCTATTAAGAGAATACAATGGTGAACCTCCAT
STO1	YMR125W.line.86.chrXIII.517539.520446_tile_4	YMR125W.line.86.chrXIII.517539.520446_tile_4	Saccharomyces cerevisiae	R64-2-1	chrXIII	518581	518993	-	TTGAATTCTAAACTTTCCACCAGATCAATAATGATATCGTTGAATAATTGACCAGCATAAGTGCTGATTGGTACAACTGTTTCGAAATTACCAGCGGAGTTTGGCAAGTAAACATGAAAAGCATACCTTGGTGTCTTCCACATGCTATCAACTGAACCAAAGTTTTTATTCAAGCGCACGAAAGACTTTAGATCATCTACTGATGGAAGGGTTAAAGCGTCATTGAACCCTTCATCACCGGTTTGGGGAGTTAATAAATGATTCCAATCAGGAAATAATTCATTCAGCTGTTCCAAGTTATTGATTAGCGCCTTCTTGACGTTTGGTAATACGACTCGGACAAGTTCTACCATTTCATA
STO1	YMR125W.line.86.chrXIII.517539.520446_tile_5	YMR125W.line.86.chrXIII.517539.520446_tile_5	Saccharomyces cerevisiae	R64-2-1	chrXIII	518939	519388	+	ATAGAAAGGAAGTAGCTAGACAAGTGATAACTTTGGATCTTTTTTTCAAAGCAGGTATATTTACAGAACCTGGTGAATCTATTGCCCAATTAATTGCCACTTATGAAGAGAACCCATTGGCTCCTACATTTAAGATAGAAGATTTGGCTATTGAAACCATTTTGGGACTTATTTTTAAATTACCTAGTGTTTCCCAGCCTTTTGCATACTTTTACACTTTATTGGTGGATATTTGTCAAAATTCTCCAAAAGCAATTGCTCCTGTCTTTGGTAGAGCCTTTAGGTTTTTTTATAGTCATTTGGATTCATTAGATTTTGAACTAAAATTAAGATATTTGGACTGGTTTTCAATTCAAATGAGCAACTTTAATTTTTCTTGGAAGTGGAATGAATGGGA
STO1	YMR125W.line.86.chrXIII.517539.520446_tile_6	YMR125W.line.86.chrXIII.517539.520446_tile_6	Saccharomyces cerevisiae	R64-2-1	chrXIII	519335	519769	-	ATGGAACCATACTCATTCTTTAACTCACCTAGAATACTTTCTAATTCAGTAACTTCCCTAGAATTGTTTGCTTTGTGGGTATAATCTAAAATTTTACGGACTGTGTTTTCCATAGGTACACCTTCTTGTCTAAAATATAGATCATTTTTTCTAACGGAATCTTCTTCTACCGTATAACCGGTGAATAATGATTGATAGTAGTTAATCAGTTGATCTCTTGGAATGTAAGAAGTATCCAAATATTTCGTGAATTCTTGTGGTAGGCTGTCCTCTACTTCTGAAAAGTTAGAGGTCAATCGTAGTTCTTTTTGAATCAAATTTTTAGCAAAATTTACCTTTGGATTATAAAAATACTTGCCAAATTTGATCGAATCGTCTT
STO1	YMR125W.line.86.chrXIII.517539.520446_tile_7	YMR125W.line.86.chrXIII.517539.520446_tile_7	Saccharomyces cerevisiae	R64-2-1	chrXIII	519713	520117	+	TAATTTCCGACTTTAACAGATTTGTTATCATATTGTTAGTCCAGGCCGTTACAGACTCTGGTAGTAGATCTTTATCACATGCTAATAAATATATTAATGATTTAAAAGAAGATCTCAAAACCATATTTGCGAAGATTGAATTGGATATCGAGACAAAAGAGTATATCATAATTGAAGCCGTCCTAACATTTTGGAACGCCAACCCTCAGACAGGTTTCTTAGTAGCAGATGCATTCAAATATGCAGGTTTACTTACTTCCAGAACCATTTTTACATTTATATTTAACGAAACTGGTTTGAAGAATAATGGTTTGATTGAAGCTACAGCAATTGAAGCGGTCTTTAGAAATT
STO1	YMR125W.line.86.chrXIII.517539.520446_tile_8	YMR125W.line.86.chrXIII.517539.520446_tile_8	Saccharomyces cerevisiae	R64-2-1	chrXIII	520063	520483	-	CCGAATCTTTTTAAACTTCCTTTGTTTCTTGAATCCAATTCGAAATTGTTCTCCTAGTGGATTCGTGTGGAATAGCGTTATCAATGTTGGCAATGAATTTGTCTGCTAACTCACGATATTCGTGGGAATACCTTCTTAATATACTTTTAATAAACCCAATCACTGTAAAATATTTCCATTTCAAATCCAGTTTATCATCTTCAATATCGTCGATGTCCATTTCCCCGTTGACTTTAGGTATCTCAATATCTTCATCAGCATTGACATCTAGTAAGTCTATAGTACTGTTGGCGATGGTACATAATCTTTCGAAAACGAACTCAAAATTATTTCCACTTTCGTTCTCTTCCGAGATTTGTTGAGATAA
CEF1	YMR213W.line.87.chrXIII.693381.695153_tile_1	YMR213W.line.87.chrXIII.693381.695153_tile_1	Saccharomyces cerevisiae	R64-2-1	chrXIII	693349	693775	+	AGATGCCCCCCGTACCAATATACGTGAAAGGCGGTGTATGGACCAATGTGGAGGATCAGATTCTTAAAGCGGCTGTACAAAAATACGGAACTCATCAGTGGAGCAAAGTAGCATCCCTTTTGCAGAAAAAGACTGCCAGGCAGAGTGAATTAAGGTGGAATGAATATTTAAATCCAAAGTTGAATTTTACAGAGTTCTCGAAGGAGGAGGATGCCCAACTTCTAGATCTTGCAAGAGAGCTGCCTAATCAGTGGAGGACCATAGCTGATATGATGGCCAGGCCTGCACAGGTCTGCGTCGAAAGATATAATAGGCTATTAGAAAGTGAAGACAGTGGAGGGGCTGCGTTAAGTACAGGAGTTACTGACTT
CEF1	YMR213W.line.87.chrXIII.693381.695153_tile_2	YMR213W.line.87.chrXIII.693381.695153_tile_2	Saccharomyces cerevisiae	R64-2-1	chrXIII	693721	694159	-	TTTCTGTTGACTTTTCTCTCAAACTGCTCAAACTTCTTTTTTATCTGGCGGTCTTCAGTGGACGTGTCATATATACCTGGCATGGGAGCTTGTTCATATACTATATCTTCATTGTAATCAATGTCGGTGCCGTATTTTTTTTTCGGTTTCTTAATGGCAACATTAATTCCTGCTTGCTTTAGCTCACGCCTCTTTTGTAGTTCAGCAATGCGTTTTGATTCTTCGAGCATCCGCTCTCTAATCTTTCTTGTAGCCTTCTTACCTTGGGTATTTAACAGACGAGCCCTAGCTTCAGCAAGCATTTCCTTTTCCTCATCTTCCAAATCACCATTATCTGGTCTAGCCATTTGAGTTTCAGCGTTAGGATTAATATCCCCGGCTTTCA
CEF1	YMR213W.line.87.chrXIII.693381.695153_tile_3	YMR213W.line.87.chrXIII.693381.695153_tile_3	Saccharomyces cerevisiae	R64-2-1	chrXIII	694105	694528	+	AAGGTTTGGATGGTAATAAGGATAAGCCAAGTAAAAAAAATAAGGACAAAAAAAGAAAACACGATGAGAACGAACACGTTGAGAAAGCAGCACTGGGTGAATCTACTACATTGACGGATGAGTATAAAAAACCAAAACTTATACTATCTGCACCAGGAACGAAACAGGGAAAAGTCACCTATAAAAAAAAGCTAGAAAGCAAAAGACAAAAACTAATCGAGGCACAAGCAACTGGCACTGTGTTGACACCAAAAGAACTACTACCCCACGACTCCGGCCAAGAAGATAATGAACGCAGTAATATAAAGAGTGGTAAACAGCTAAAATCACGCATACGAAAATTTTTAGTGCAAATGTTCGCATCTTTGCCT
CEF1	YMR213W.line.87.chrXIII.693381.695153_tile_4	YMR213W.line.87.chrXIII.693381.695153_tile_4	Saccharomyces cerevisiae	R64-2-1	chrXIII	694475	694899	-	GTATTTTCATGGAAGTGCGCCCTTGGGTTATATGCTGCATACGCGACTCCACCTCTTTGAGAAAATCTACCGTATCTTCTGGTACCATGTGAGGTTCTTTGTTTATGGCGTTCGCGACTAGCAAGTTGTACTTATTGTCAATCGCGGACTGCGGATTGTTTTTGAATTCTGGTATGGGTAGCGTTGAGTAAGCTAATGGAACGGCTACTAATGAGACGCGTGGCGCATCATTTTGAGATGGTGGTTCTATGAAGTTGTCCTCTTCATTCATCGCTCTTTCATTTTCAAATTCTTTCTCGTATTCCGCTATCTCTGCATCTTCTTCTTTCTCGTCTTCACTTAATACAATTTCGAAATCGTTCTTGGGACTA
CEF1	YMR213W.line.87.chrXIII.693381.695153_tile_5	YMR213W.line.87.chrXIII.693381.695153_tile_5	Saccharomyces cerevisiae	R64-2-1	chrXIII	694845	695249	+	CAATTCAAAACAGCAATGCCCCCAACTGAGGTTCTTCTGGAATCGATCCAATCAAAAGTGGAGTCTATTGAACAGTTACAGCGTAAACTACAACATGTGCAACCACTGGAACAACAGAATAACGAGATGTGCAGTACCCTCTGCCATCACAGCCTGCCCGCTTTGATTGAAGGGCAACGCAAGTACTACGCTGATTACTACGCCTACCGACAAGAGATACGATCGCTTGAGGGTCGTAGAAAGCGTCTTCAAGCCATGCTAAATTCTTCTTCTTCCATATAGCATTAGTATAGCATTAATATAACTTTTATGAACTAGGACATAGAGGACTTGTGACAACGCATTACCCGG
CUS1	YMR240C.line.88.chrXIII.749930.751240_tile_1	YMR240C.line.88.chrXIII.749930.751240_tile_1	Saccharomyces cerevisiae	R64-2-1	chrXIII	749898	750322	+	AGTTATTTCAATACAGTATATAGTTGCTTCTCCGATTCCTCTTCGTTTCTCTCAAGTTTTTCTTCTGCGCTTGTCACTTCGGATATGTCTTCCTGGAAGTGATCTAACTTATGCTCTACTTCATCATCGATTTTGTCATCTTGGCGCCCATTTTCCGCATTCGCCTGTGTATCCTCTTTTGAATTTTCAAATTCAGGGGTTTCAAATGAGATCAATGCGCCAAAATAGTTTCTACCCTGTTTCTTGGACCTTGAATGGTGATTAGGGATTATTTTTCCGTAAACGTCGCCTTTTAAATTCGTTATATCCCAATTCAAGCCGGCAATTTTCAGATCAGGATATCCCGTAGGTAATCCAATGTCTTTCAT
CUS1	YMR240C.line.88.chrXIII.749930.751240_tile_2	YMR240C.line.88.chrXIII.749930.751240_tile_2	Saccharomyces cerevisiae	R64-2-1	chrXIII	750268	750694	-	AGACCTTTTGAACTTCCTGACATTATCAAGAAGACAAATATAGAACAAATGAGATCGACGCTTCCGCAAAGCGGACTGGATGGTCAAGATGAAAAGTCACTAAAGGAGGCCTCAAGAGCAAGAGTGCAGCCGAAAATGGGCGCCTTGGATTTGGATTACAAGAAGTTACACGATGTGTTTTTCAAGATAGGAGCCAACTGGAAACCTGACCATTTGTTATGCTTCGGTGACGTCTATTATGAAAATAGGAATCTTTTCGAGGAAACGAACTGGAAAAGAATGGTTGATCATAAGAGACCGGGGAGAATTAGCCAAGAGCTTCGTGCCATAATGAATTTACCCGAAGGTCAACTACCACCATGGTGTATGAAGA
CUS1	YMR240C.line.88.chrXIII.749930.751240_tile_3	YMR240C.line.88.chrXIII.749930.751240_tile_3	Saccharomyces cerevisiae	R64-2-1	chrXIII	750640	751078	+	TTTTACCTAACAGAGAACGGCCAGATAGATATTCCTTCTTGGACTGCCAGTGGCTTGGAACAGGAATGACATTTTTGGTGCACTTAATTGACGCTAGTAAGCCTGGATATCTTGCGTCACAATCGTACCATTCTATAATTTGAGGATACGGTACCTGGCTTTTTAACTGCGAAAGTGAAGGTTTTTCAGTCTTCCTACGTTTTCTTGCCGATAGATGCTCCTCAATACCATCCGAGGGTGTATCCTCCAATTCATCTTCTGCTGTATGCTTTCTGTTCATAACTGGGTTTTTCTCAACAATAACGACATGATTGTTCTTTTCATCTTTCGTGATTTCCTTCGGCGTATCATTCTCTTGCACTTGAAATCGTTGTAAAACGTCTTT
CUS1	YMR240C.line.88.chrXIII.749930.751240_tile_4	YMR240C.line.88.chrXIII.749930.751240_tile_4	Saccharomyces cerevisiae	R64-2-1	chrXIII	751024	751472	-	AGTGATAGGGTAAGTAATGGAAGAAGAGGGCACAGGTCCAATCACGCAGCTTCATTACAGGGCTATAATTGCAAGAATAATAACTTTCAACCATATAGAAATCCAATACAGTATATTGGTATTGTTTAGAAAGGTATTAAGAAGGCAGTAGCATACAGAGTATATATCTATAGGCAGAGCATCAGATCATAAAGATAGTGGTGAAATGGCTAGAACCAAAAGTAGGAAGCGTTCCGGAAATAACCAAAATAAGAATGCGTCTGTGGTAAATAATAAGGCTGAGATCGCCGCCATGATTGATGCAAGAAGGCTTGAGCAAAAGAAAAAGGGTGGGGTGACTAACAGCAAAGGAAAGACGAATAAGGTAGTGGATGCGAAGTTAGAAAAAGAGTTCA
PRP24	YMR268C.line.89.chrXIII.802888.804222_tile_1	YMR268C.line.89.chrXIII.802888.804222_tile_1	Saccharomyces cerevisiae	R64-2-1	chrXIII	802860	803268	+	GTCTACTCACCTAGAAACATCTTGCGAAAATCGTCGTTGGACATCTGCTCTTGTTTGTCAGGAATTTTTTTCTTTACTTGAAGATTTGGTCCTTTTTCCATCATGTTTATACAACTAGGTTTGACGTGTTTCATGCTGTGATTCTGTTGATTGTTATAATATCTTTTCATGTCATTAATAGTACCTGAACGTATCACCTTTCCCTGAAATTGAGATCCATTTAGTATCATTAGCATTTTTGCTGCAAACTTACTATCTCTAAATATAATAATGGCGCCATTGAAGTCGCTAACGAGAAGTATTTTCCTAATATCTTTTTCATTGATGTGTATTTCTTCCTGAAGAAATTGGCAGAT
PRP24	YMR268C.line.89.chrXIII.802888.804222_tile_2	YMR268C.line.89.chrXIII.802888.804222_tile_2	Saccharomyces cerevisiae	R64-2-1	chrXIII	803214	803633	-	ACACTAGAGGGGCGAGAGATTATGATACGAAACCTAAGTACAGAATTGCTCGACGAAAACCTTCTGAGGGAATCTTTTGAGGGATTTGGTTCCATTGAAAAAATCAACATACCTGCTGGACAGAAAGAGCACAGTTTCAATAACTGTTGTGCATTTATGGTTTTTGAAAATAAAGATTCTGCTGAAAGGGCACTTCAAATGAATAGAAGTTTGTTAGGTAATAGGGAAATTTCCGTTTCCTTGGCTGATAAAAAACCATTCTTAGAAAGAAACGAAGTCAAAAGACTTCTCGCATCGCGTAACAGCAAAGAACTAGAAACACTAATATGCTTATTTCCACTTTCAGATAAGGTGTCACCAAGCTTAA
PRP24	YMR268C.line.89.chrXIII.802888.804222_tile_3	YMR268C.line.89.chrXIII.802888.804222_tile_3	Saccharomyces cerevisiae	R64-2-1	chrXIII	803580	804026	+	TGGCAGAATCGGTCCGTTTCGACTTTTCCAGCGGATTGGAAACTTTAGTAACTAAAGTATAACCTTCTATTTTGAGTCCATTCAATTTTTCTACACAATATCTTGCATCCTCTTTAGAAGTAACATCGATGTAAGCGAACCTTCTGCTTGTATTGAATCGTAAACTGGGAAGCCGTATACTGAGTGCAACAACGTTAATATCTTGCAATAGATCTCTAATATTTCTTTGAGTATAACTTGGGGGGAAATTCGTCATCCATAATGTGCATTCTGTTAAATGAGATACTATAATTTCATTCTGACCTACAACTTTGTGTGTTTTGGTTATTGCAGCGAGGGCTCCATCATACCTGGCAAATTCAATACGTGCAAAACGAAAGTTCTTCTTCAGCG
PRP24	YMR268C.line.89.chrXIII.802888.804222_tile_4	YMR268C.line.89.chrXIII.802888.804222_tile_4	Saccharomyces cerevisiae	R64-2-1	chrXIII	803972	804400	-	ATGTCTTTTTTAAAGTCATCGCTAAAAAATTTTCAGGCGGGAACTTATTCAAAATGGCAGATTTACTACAACATTGAAAACCCTTTATATTTATTATATGAGAATCATTAGCGATAAACAAGCCCACATATTCACTTCATAATCTGTGATAATGGAGTATGGACATCACGCTAGACCAGATTCAAAACGACCATTGGATGAAGGATCACCAGCAGCCGCAGGATTAACTTCTAAGAAGGCGAACGAAGCTTTAACAAGAAATAGAGAATTAACAACTGTATTAGTCAAAAATTTGCCTAAGAGCTATAATCAAAACAAAGTCTATAAGTACTTCAAACATTGTGGGCCCATTATACACGTTGATGTTGCGGATTC
HSH155	YMR288W.line.90.chrXIII.845571.848486_tile_1	YMR288W.line.90.chrXIII.845571.848486_tile_1	Saccharomyces cerevisiae	R64-2-1	chrXIII	845541	845957	+	ATCATGAGTCATCCGATTCAATTTGTAAACGCTAATAATAGCGATAAGAGCCACCAATTAGGCGGTCAATATTCTATTCCTCAGGATTTGAGGGAAAACCTGCAGAAAGAAGCTGCACGTATTGGTGAGAACGAAAAAGATGTGCTACAGGAAAAAATGGAAACTAGGACAGTGCAAAATCGAGAGGATTCATACCACAAAAGAAGGTTTGATATGAAGTTTGAGCCGGATTCCGATACACAAACTGTTACGTCTTCAGAAAATACCCAAGACGCTGTCGTGCCAAGGAAAAGAAAATCTCGTTGGGATGTAAAAGGGTACGAGCCACCTGATGAATCTTCAACAGCGGTCAAAGAAAACTCT
HSH155	YMR288W.line.90.chrXIII.845571.848486_tile_2	YMR288W.line.90.chrXIII.845571.848486_tile_2	Saccharomyces cerevisiae	R64-2-1	chrXIII	845903	846321	-	TGTGAACGTAAGGTTTTGTTAAATCTCCTAGCTGGTAAAGGACGCGATCTATGGTCTTGATCATTAGATGTCTTTCCTGGTCTTCCAAACTTCTGTCTAGTAATATGGGCAATAAGCGGTTAAATATCATTTCTGGACCAAATGTAACAGCTTTATCGGTTAAAATCCGCATAGAAGTCCTCCTACTCGCTGTATTGCCATTTTTTATTTTCAGAAGTAACATCGACAGGGTTCTTTCTTTCTTTTCATCCTTATTTAACTCATCTATGGGTTTTTTGGATATAACGTCGGCGAAATATTTATGGTCAGAAGGTTTAAAAAACATCAAATCATGGATTCCTTCTACATTAACCAAAGCACTATCA
HSH155	YMR288W.line.90.chrXIII.845571.848486_tile_3	YMR288W.line.90.chrXIII.845571.848486_tile_3	Saccharomyces cerevisiae	R64-2-1	chrXIII	846267	846675	+	AAAATACTTGTAGTAGCTGCCCCATTGCTAATAGATGAAGATCCAATGGTTCGTTCAACAGGCCAGGAGATAATCACCAATCTGTCTACAGTCGCTGGCCTAAAAACCATTCTAACAGTAATGAGACCTGATATTGAGAATGAGGATGAGTATGTTAGAAATGTAACTTCAAGAGCGGCGGCTGTGGTGGCAAAAGCCCTTGGTGTTAATCAATTGCTTCCTTTCATCAATGCAGCATGCCACTCACGGAAGTCTTGGAAAGCAAGGCATACTGGCATAAAAATTGTGCAGCAAATAGGTATACTTTTGGGAATAGGTGTCTTGAATCATCTTACTGGGCTGATGAGTTGTATCA
HSH155	YMR288W.line.90.chrXIII.845571.848486_tile_4	YMR288W.line.90.chrXIII.845571.848486_tile_4	Saccharomyces cerevisiae	R64-2-1	chrXIII	846621	847064	-	ACCCAAAATTTTTGAAAGAATTCTGGCGCGATTTCTTCTCTCAGAAATTTTGGCGTTATGGATTCTACAGCGCTACATTTTTGTAATACTAAAAGAATGGTCTTTTTCATTTCATCATCGGGAGAGTCGAATTCACGTCTAATTATTCTCATTGCTTCTGTGGTATAATAACCGGCATACTCTGGGTCCATCAATGGGATCATAGATCCAACAGCTTTTAAAAAAGAAGATAGCACTTTACCACGATGACTTCTTATACCCTTCCATAATGGCTCCAGTACAACGTTGAAAACTTCGATACCATATGGATAAGAATTTTCTGCTAGTGTTGATAAAGTATGTGCTGTAACAATTCGCACCGGAACGTGATCATCCATTAGGCAGTCTTT
HSH155	YMR288W.line.90.chrXIII.845571.848486_tile_5	YMR288W.line.90.chrXIII.845571.848486_tile_5	Saccharomyces cerevisiae	R64-2-1	chrXIII	847009	847458	+	TCAGACGAGTGGCATTGGATAGACCATTAAACAAAGTTGTTACATATACTACTGTTACATTAGCAAAGAAATTAGGTTGTTCTTATACCATTGATAAATTATTAACACCATTGAGAGATGAAGCTGAGCCGTTCAGAACAATGGCTGTCCATGCTGTTACTAGAACAGTAAACTTATTAGGGACAGCAGATTTAGATGAGAGATTAGAAACGAGGCTTATTGATGCGCTCTTGATAGCATTTCAAGAACAAACAAATAGTGATTCTATAATCTTTAAAGGGTTTGGGGCAGTGACGGTGTCACTTGACATCCGTATGAAACCGTTTTTAGCACCCATTGTGAGTACGATTTTAAATCATTTAAAGCATAAAACTCCCTTGGTTCGTCAACATGCA
HSH155	YMR288W.line.90.chrXIII.845571.848486_tile_6	YMR288W.line.90.chrXIII.845571.848486_tile_6	Saccharomyces cerevisiae	R64-2-1	chrXIII	847403	847845	-	ACGTGGCATTTGCTGATCTTCTTATTTCTTTATTTGTACTTTTCAAAAGTTCTAATAGTTCAAAACATATTCTCATCCATTCTTTAGGAGGTGCATAGGTAGGTGCTAATTTACCAATAAGTCCAACAAATTTGATAGTGTTTACTTCGACTTTTCTATGCTTGTTTCTTAAAATTGGAGTTAAGGTTGGTAAAATTTGATTAATAGGAGGTTGTAGTTTATCCAAATCCATTACGCTAGTAATACAGTACATAGCGTTGATTATAGAACCTAATACCTCTGGATATACTTCGCCTAAGGATTCATACAATATAATGTTCAATTTATTCAACATTTCGAATTCGTGACAGTTCTTGATGACTGGTATTAGTATGGCACATAGATCTGCT
HSH155	YMR288W.line.90.chrXIII.845571.848486_tile_7	YMR288W.line.90.chrXIII.845571.848486_tile_7	Saccharomyces cerevisiae	R64-2-1	chrXIII	847791	848206	+	TTTGGATTCATTGCTGAAGCAATTGGACCTCACGATGTTCTTGTTGCGTTATTGAACAATTTAAAGGTTCAAGAACGTCAGTTACGTGTATGCACGGCTGTTGCTATCGGTATCGTTGCTAAAGTGTGTGGTCCTTACAACGTGCTGCCAGTAATCATGAATGAATACACAACACCAGAGACTAATGTTCAAAACGGTGTTCTCAAGGCCATGTCATTCATGTTTGAGTACATTGGTAACATGTCTAAGGATTACATATACTTCATAACACCATTATTAGAAGATGCACTCACCGATAGGGATTTAGTTCATCGTCAGACAGCGTCGAACGTAATAACCCACTTAGCTTTAAACTGTTCAGGT
HSH155	YMR288W.line.90.chrXIII.845571.848486_tile_8	YMR288W.line.90.chrXIII.845571.848486_tile_8	Saccharomyces cerevisiae	R64-2-1	chrXIII	848153	848563	-	CAAGTAAAATATTCTTACAAGTTGTGGTTATTTATATGCTCTATATATATTCACAGAACTAAATCCAGTTCTTCTATATATTCTTCATTGTTGTCTGGTGTAACGGGGTAAAAAGGTACCATGGCGTCCTGGTACATTACGTACATGTTATTATACACCCTCCAAAATGCTTTCCTTACATTCTTCGCTGGATGGAACAATCCTGCCCATATGTAGTTCATGAATAGTCCAGGGCCAAGAGCTTGACTCAGTGCCTCCAAACCTTCTAAAATACGCATAATAGCATGTGGTGAAGTTTCAAAAATATTGGGTATTAGAAGATTCATTAAATGAATGAAGGCATCTTCGTGACCTGTA
CUS2	YNL286W.line.91.chrXIV.95223.96080_tile_1	YNL286W.line.91.chrXIV.95223.96080_tile_1	Saccharomyces cerevisiae	R64-2-1	chrXIV	95195	95618	+	GATGGATGCTGATGAATTGGAATTGAAAGGTCATTTGAAAAAATTGAAAAAAGAAGAATTGCTTAGAAGGAAACAGTTAAAAGAGAGTAATCTTCAGAAAAGAGAGCTTGAATATAATAATGCCTCAAAAAATACTTCAATATATATTTCTGGTCTTCCCACAGACAAAACAACGAAAGAAGGACTCACTGAGCAGTTTTGCAAGTATGGAATGATAAGAACCAATCGAGATGGGGAACCCCTTTGCAAGCTATATGTGAATGATAAAGGCGCTTTCAAAGGGGATGCCTTGATCACTTATTCCAAGGAAGAAAGTGTTACATTAGCAATCGAAATGATGAACGAGTCGATCTTCCTGGGAAAACAGATCA
CUS2	YNL286W.line.91.chrXIV.95223.96080_tile_2	YNL286W.line.91.chrXIV.95223.96080_tile_2	Saccharomyces cerevisiae	R64-2-1	chrXIV	95565	95997	-	CGGTCATGATTTTGCAACATTGCAATGCAACTTTATTGTTCTTAAAGACGACCGTCGCTTCCCCCTTATTGGGAGATACAGATATACTGTCTACTTGACCTATCTCTTCACAGCCTTCCAAAAGATCTTCCTGAATATCATTTATATCATCATTTGTGTATGATTTGTAAATATTGAATACGTTGGCAAATATCACCGTTCGATCAGCTTTTGCTAGGCTTTCATCGTCATTGTAATCTATTACTTCCCCCTCCCCTTCAGACTTCGCTTTTTTTAGCCTCTTTATTGGAGGCTCAGGTCCGTTGAACTCCTTTAAATCATTTTCTTTCCCGTGCATATTGTCACCTTCCTTGTTTTGAAATTGGGCTCTTTCGACCCT
CUS2	YNL286W.line.91.chrXIV.95223.96080_tile_3	YNL286W.line.91.chrXIV.95223.96080_tile_3	Saccharomyces cerevisiae	R64-2-1	chrXIV	95943	96373	+	GGACGTTATTTTGATGGGCAAAAGTTGCTTGCTTTCATTTCTGGAGATGAGAACACTTCAAGCACAAGTGACAAGAATGAGGACAGCGAAGTGGAAGATGACCTTATATAGAACTGCAGTAAAAAAATGTATTACCCCCATATCTTTGGTACTTAAGTAAAATAAGTGAACACAATGTAATAAACAGAATGGATTAGGGCTTTATGACTTCCCAGTACAAAATAAATGTCGATATAATACTTGAAAATGCAAGCAATGCCATCAAAAAATTTGAGCGGTACGAGAATCGAACCCGTGTCCCCACCTTGGAAGGGTGGGATGATAACCACTACACTAACCGCCCATGTGTTGGATGGTGTAACTGTAATGACGAGGTA
CWC25	YNL245C.line.92.chrXIV.186346.186885_tile_1	YNL245C.line.92.chrXIV.186346.186885_tile_1	Saccharomyces cerevisiae	R64-2-1	chrXIV	186318	186738	+	TTTAGTAGTCTAGGTCCGGAGCGGGCTTGGACAACGGTTTCCCTCGTTGCGACATTGCTCTTTTTTTTGTTGAGTCTGGAGTTCTTCTTTGTTGTTTAGTTACCTTAAACTTACTCATTGGATCATCTTTAAGCAATTTTGACTTCTTCTTCTGCGAACTTATGGATGTTGCGGCACCAGAAGCGGAAATAGTAGTGGCCGCCCTTACAGGCGGTGTTGCAGGTTGGTTTAGTATAGATGAATCTAGTTTTTTCTTACCTAATAAATAGTCTTCCTTTTCGTCACTCAGTTTTGCATCCTGATACATCCATTCCAAGCCCGACTTCTTCAAAGCCAAGTCATTCTTGAGAGTCTCCGGCTTATCCTT
CWC25	YNL245C.line.92.chrXIV.186346.186885_tile_2	YNL245C.line.92.chrXIV.186346.186885_tile_2	Saccharomyces cerevisiae	R64-2-1	chrXIV	186684	187094	-	TATTTACACTATAATATATAATATAACATCTCATCTTTTTTTATTTCTTTTTCTTCTTCTCCCGCCGCGGGCTTACATACAGAGATATAAGAACAAGTGGTACGTAGCATGCAGCTTCTCAAAAGAGATGAGCGTTCAGTTTTGAGTACAGGGAAGAAAGGCCAAATCGAGAGTACATTATCATGGGGTCGGGCGATTTGAATCTGTTGAAATCATGGAATCCCAAGCTTATGAAAAATAGAAAAAAAGTATGGGAGACCGAACAGGATCTAATTACCGAACAGCAGAAGCTTAACACGCGATTGAAAGAAATTGAAAAAGAACGAGAACTAAATGAACTGCTGAACGAATCGAGCA
SSU72	YNL222W.line.93.chrXIV.229094.229714_tile_1	YNL222W.line.93.chrXIV.229094.229714_tile_1	Saccharomyces cerevisiae	R64-2-1	chrXIV	229066	229472	+	AATGCCTAGTCATCGCAATTCAAACTTGAAGTTTTGCACAGTTTGTGCATCAAACAACAATCGTTCAATGGAATCGCATAAAGTCCTGCAAGAAGCAGGCTATAATGTTAGCTCTTACGGAACAGGTTCAGCTGTGAGACTGCCTGGTCTATCGATAGATAAGCCTAATGTGTACTCATTTGGTACACCCTATAATGATATATATAATGATCTTTTATCACAATCAGCAGACCGTTACAAGTCGAACGGTTTATTGCAAATGCTGGATCGTAATAGAAGACTCAAAAAAGCACCTGAAAAATGGCAAGAAAGTACAAAAGTCTTCGACTTCGTTTTCACTTGTGAAGAGAGAT
SSU72	YNL222W.line.93.chrXIV.229094.229714_tile_2	YNL222W.line.93.chrXIV.229094.229714_tile_2	Saccharomyces cerevisiae	R64-2-1	chrXIV	229418	229820	-	ATTGAAATTTCACGGATAATGTAGGATTCATGAGGGCCGCTTAATGCTTATGCTTTTCTACAGTAATTGACCGTTTTGTTTAGTAATATGAAGGAGCGTATAATGACGGTAGTTGAGAATGTGAGCTTTGCCACTCAGTTAAAATGTCCATTATACAATCTTCAAAGGGAATGTCATCTTTTTCACATTGTTCTATTTTATCATTGAGCATATCAGCTAATTCCAATATAGCTTTGCTACCAATTTTAGCATTTTCATCATCATCTTTAATGTCAACATTAATTACATGCACTATTTTGTTTAATTTCCCACCTCTATTCATCAAATCTTCACAAACGGCATCAAAACA
U1	snR19.line.94.chrXIV.230105.230672_tile_1	snR19.line.94.chrXIV.230105.230672_tile_1	Saccharomyces cerevisiae	R64-2-1	chrXIV	229991	230435	+	TGAAATGAAGAAAATAGAAGCATGAAACTTTAAAAGTTTCAGTACTTTAAGAAAGAAATAAATAGAAAAATGTTCCATTTATTTCTGAAAATAAATCAAAAATTATAAGATCCACCCGTTCCTACCAAGACCTTCCAAAATTTTTCCCATAACGGGAACGAGCAAAGTTGAGACTGCTCAAAAGAGCACATCTTCAAACTACAATCCCGACCAAATAATCTCAACAGCCATACCTTCATCATAAACTTAAGTTCATTCGAATCTGCCGTCAAAAACTAAAATGGCACGCTAGAGAAAAGTAGTCAAAAAGAATGCCTCTACAAAGCTCTCTTTTGAAAGGCCCCAGCTCCCCTAACACCAATTTGAATTTGGTGTCAAACTTCTCCAGGCA
U1	snR19.line.94.chrXIV.230105.230672_tile_2	snR19.line.94.chrXIV.230105.230672_tile_2	Saccharomyces cerevisiae	R64-2-1	chrXIV	230381	230785	-	GAAGAAGTTCCATTTAATAGAACTATTTTACAAACATACTTTTAGCGTTAAAATATAGTTTTTTCTTGAATTTTTTTAAAATCCTCATACTTACCTTAAGATATCAGAGGAGATCAAGAAGTCCTACTGATCAAACATGCGCTTCCAATAGTAGAAGGACGTTAAGCATTTATCATTGAACTATAATTGTTCATTGAAGTCATTGATGCAAACTCCTTGGTCACACACACATACGGCGCGGAAGGCGTGTTTGCTGACGTTTCCATTCCCTTGTTTCAATCATTGGTTAATCCCTTGATTCCTTTGGGGATTTTTGGGTTAAACTGATTTTTGGGGCCCTTTGTTTCTTCT
LSM7	YNL147W.line.95.chrXIV.350940.351383_tile_1	YNL147W.line.95.chrXIV.350940.351383_tile_1	Saccharomyces cerevisiae	R64-2-1	chrXIV	350908	351354	+	AACATGCATCAGCAACACTCCGTATGTTTCACTTCTTATTTTCTTCCGTGGCAATAACCTTCCTTTTGACTTATTTATACTAACATTATAATAACTATGTTTCCTTTTTGAACTAAGAAATCAGAGAACAAACCACAACAGCAAAGGAAAAAATTCGAAGGCCCTAAAAGAGAAGCTATTCTGGATTTAGCGAAGTATAAAGATTCTAAAATTCGCGTCAAATTAATGGGTGGTAAATTAGTTATAGGTGTCCTAAAAGGCTATGATCAACTGATGAACTTGGTACTTGATGATACAGTAGAATATATGTCTAATCCTGATGATGAAAACAACACTGAACTGATTTCTAAAAACGCAAGAAAGCTAGGTTTGACCGTCATAAGAGGTACTA
LSM7	YNL147W.line.95.chrXIV.350940.351383_tile_2	YNL147W.line.95.chrXIV.350940.351383_tile_2	Saccharomyces cerevisiae	R64-2-1	chrXIV	351300	351722	-	AATCAGTAAATAATTAAGATTGTAGAGGGAGGGGTGTATGTGTATGCGGATACTTTTTTGATTTGGCAGAAGGAAAATTGGTATTGGCAGCTGTACAGTGACTCCCCTTATACAAATGATCTCAGTTTGTTTCGTTTTTCCTCATTCTCTGGCTTTAGACTTCAAATCGCGGTGTAAAAAAAATAGGACAAAACTATGTAGCGCATACTATGTCAGTCAGGTATTGAGAATATGTAAAGAAATGCCATACCGTGATTTGATTTTGTTTTCAACTGTAAGGAAGGGAGTTTATATGAGATTATATTATTAAACCTATTTTTGCATATATAGTACATCAGAACCTTCGGCGGAACTTAAAGAGACCAAAAT
YSF3	YNL138W-A.line.96.chrXIV.366033.366412_tile_1	YNL138W-A.line.96.chrXIV.366033.366412_tile_1	Saccharomyces cerevisiae	R64-2-1	chrXIV	366003	366417	+	AATGGTATGTTACGTTCTATTGCGCTTTAGTTTGAATTGAAATCATCTTTACCATGGTACTAACTACGCTTGCGATGAATCGTGCAAGTCCGTGCGGCTTATACGTAATGCTAATACTCAAAACAGGCGGAAAAGCAGAGGCAGTTGAAGTTGCAGAAGATATACAAACAAAAGTACATCGGACTGGGAGATGAGAGCACTACACGAGAACAGTGGCAGAGAAATGTGAGAAACGATACACTAAATACATTACAAGGCCACTCCGCATCTTTGGAGTACGTTTCATTGAGCCGAGGAGACCTTAGTATACGTGACACTCGTATTCACCTCCTGAAATCCATGTCCCCTGGCTATAAAGC
YSF3	YNL138W-A.line.96.chrXIV.366033.366412_tile_2	YNL138W-A.line.96.chrXIV.366033.366412_tile_2	Saccharomyces cerevisiae	R64-2-1	chrXIV	366363	366765	-	TTCGATTTCACACGGTTGCAACTTGGCCTACTCAATTACGAAAAGTTTCAAGCTGAGTTTTCCCCTATACTACCAAAAGATTTCACTTCTAAATCCCTGTTTATGACTTCACGCGACATGTATAGATCATTTTAAACGATATGAATTGTATACTGTCCCAACATTTTATATCTTTATATAAACATCAAGGTTAATAATGTTCGACAGTTACTAGAATCAATGCCTAAAAGGTTACTGACTGAGTGTGATCTCTACCATAAATCTTGAGAACGACATACGAGGCGTAATTTTATGTAAAAATTATTTATGGATGTGGCTTCAACGTCCTACCTCTCTTCTCGTAAGTAGG
PRP2	YNR011C.line.97.chrXIV.644320.646950_tile_1	YNR011C.line.97.chrXIV.644320.646950_tile_1	Saccharomyces cerevisiae	R64-2-1	chrXIV	644290	644696	+	ACCTTCACCGCCTCCCCCTATTTGTTTTATCGTCAATTAAATCTTTAAAGATTTGTGGAACCATGTCTATCAACCATTCTTCCTTAGGGATAACTAGACAGTCCCTGATAAATTCCTTCGACGTTAGCATCAATTGTTGATAAAGCACATATTTGCTTGGTCTCTGCGCCTTTTCCTTATGATTAACGAAAAGTATACTGGTAGGATGAACACTAACGTTCAGCCCACCTGATGACCTACCCATGGTTTGATAGCCGGTGGGGCCTAATTGTACAATATTCATCGGAAACCCGCTGATGAAGCATCGAGTTATTCTAGCATTTATGTAGCCCGCTATATTGCCTATCTTCATCC
PRP2	YNR011C.line.97.chrXIV.644320.646950_tile_2	YNR011C.line.97.chrXIV.644320.646950_tile_2	Saccharomyces cerevisiae	R64-2-1	chrXIV	644642	645042	-	CCTTGTGAACCTGAATTTGCAAAAGTGCTTTATACAGCTGCTACGCACGAACAATGTCAAGGTGTACTAGAAGAGTGTTTGACCATAGTTTCGATGCTACATGAAACACCTTCATTATTTATTGGTCAAAAAAGAGATGCTGCGGCAAGTGTGTTAAGCGAAGTGGAAAGTGATCACATATTGTATTTGGAAATCTTCAACCAATGGAGAAACTCTAAATTTTCCAGAAGTTGGTGTCAAGACCACAAAATTCAATTCAAAACGATGTTGAGGGTAAGAAATATTAGAAACCAATTATTCAGGTGCAGTGAAAAGGTTGGATTAGTTGAAAAGAACGACCAAGCCAG
PRP2	YNR011C.line.97.chrXIV.644320.646950_tile_3	YNR011C.line.97.chrXIV.644320.646950_tile_3	Saccharomyces cerevisiae	R64-2-1	chrXIV	644988	645396	+	GAAACTCGCACATCATTTTACCTAACCGAGTGATTGTCCCTTTGCTATTTAAGGCACCTAAAATGTATAAATTTTCCAAAGACTTCCGTAATGTGGGGATACTGGGCTTATCCATCAGGGGAAACTTTATTAGGTCAGTAACGCCAAGCGATAATAATAATAACACCGTATTAGAAAGATTTGTTCTTGTGATCTCAGGCTTAGGCATAAGTTCCAACTCGTGCAAATATGACCATTTGGTAAAAATTCTAAAACATTTTCCCGGCCCAACACGACCAGCCCTACCGGCACGCTGATCAACTGAAGCTCTTGAGCATGGAACTGTTAAAAGTTGGGTCATTCCAGTGGAGGGTAC
PRP2	YNR011C.line.97.chrXIV.644320.646950_tile_4	YNR011C.line.97.chrXIV.644320.646950_tile_4	Saccharomyces cerevisiae	R64-2-1	chrXIV	645342	645741	-	CGGAGGCAAACTATATACATGCCGCTATAACAACTATTTTTCAAATTCATACTACGCAAAGTTTACCGGGGGATATATTGGTGTTTTTAACGGGGCAAGAAGAAATTGAAAGAACAAAAACCAAACTGGAGGAGATCATGTCTAAATTAGGTTCTAGAACAAAACAAATGATTATAACTCCTATATACGCAAATTTACCCCAAGAGCAGCAATTGAAAATTTTCCAGCCGACTCCGGAAAATTGTAGGAAAGTTGTTTTGGCAACTAATATTGCGGAAACTTCATTGACCATTGATGGTATTAGATATGTCATTGATCCTGGATTTGTTAAGGAAAATTCGTACG
PRP2	YNR011C.line.97.chrXIV.644320.646950_tile_5	YNR011C.line.97.chrXIV.644320.646950_tile_5	Saccharomyces cerevisiae	R64-2-1	chrXIV	645686	646092	+	GGCTGTAATGTGTAGTGGATATCTACAGGATATCTTCTCCCAGGAACGTTGAAAATGGGACAATTATCAAAAAACTCTGAAAATTTTTTTGCGTTCATTGTTGCTGATGATATAAGCAATTTTAAAGTGGGCCTCTGCGGCAAAATATCTTTCAGCAAACCTATCAGGATATCTGTGGCTAGAGTACGTTCATGAGCTTCATCAATCATAATACAAGAATATTTGCTTAATTTGGAATCTGTAAGAAATTCTCTTAGTAACATACCATCCGTCATATACTTTAGAACCGTTTTATTTGGGGTTGTTTTGTCTTCAAAACGGATCTGATAACCCACTTCCTTCCCAAGCACAAC
PRP2	YNR011C.line.97.chrXIV.644320.646950_tile_6	YNR011C.line.97.chrXIV.644320.646950_tile_6	Saccharomyces cerevisiae	R64-2-1	chrXIV	646038	646476	-	TCTGACAAGTACGATTATGTGTTCGACACAGATGCAATGATTGATTATACTAATGAGGAGGACGATTTACTACCTGAAGAGAAACTTCAATATGAGGCACGTCTAGCACAAGCTTTAGAAACTGAGGAAAAGCGTATACTGACTATACAAGAGGCAAGAAAACTTTTGCCTGTACATCAATACAAGGATGAGCTACTACAAGAGATCAAAAAAAATCAAGTTTTGATTATAATGGGTGAAACCGGTTCTGGTAAAACCACACAGTTACCCCAATATTTGGTAGAAGATGGATTCACTGATCAGGGAAAGTTACAGATTGCCATAACACAACCACGTCGTGTGGCGGCCACTTCTGTTGCTGCAAGAGTAGCAGATGAAATGAATG
PRP2	YNR011C.line.97.chrXIV.644320.646950_tile_7	YNR011C.line.97.chrXIV.644320.646950_tile_7	Saccharomyces cerevisiae	R64-2-1	chrXIV	646422	646822	+	AGCCTTCCAATGTTATATCATCAGGGTGATCGCTTTGCCCCGCCATAGCATTTCGCAATTGTTGTTCTTCCCACATGCGTTGTCTGTTTATTTTGTCAATTTCTTTTGCATTCTTTATTTTATGAGTAACTTCTACGTTAAATTTAGAATTAGAAGAGGCGTACTTAGTTTCATTCTCGGAGTCACCTAGTAGACCCTTCTTTGTAGTAAGTTCATTATTTGACGTTATTTTTTCATCATACTTTGATGACTTTTTTTGTGATCCAAGTTGTTCTCCTTTTAAATTGTTCTTTTCTGGACCTTGGTTCGTATTAGAAAAAACTTTATTGGGGTCATAGCGTGATCGT
PRP2	YNR011C.line.97.chrXIV.644320.646950_tile_8	YNR011C.line.97.chrXIV.644320.646950_tile_8	Saccharomyces cerevisiae	R64-2-1	chrXIV	646768	647210	-	AATTAAAGACTAATCATCGAAAATATGCAAGAATTCTTTAAGTGCTCGTATCTCAAATGTAGCCAAAACAGTACTAGCCCATACAACCTGATGACGAGAACGTGCTGAAAGTGGAAGACAGTTAGTTACCCGGACAATTAAAAAGTGATATTAATCAATTGTATAAGTAATAACGGATAGCTGCTATATGTTTAATTGGCATCTATATAGATAACAAGCGTGTATAGCAACACATGTCAAGTATTACATCTGAAACCGGTAAGCGAAGAGTGAAACGAACGTATGAAGTTACAAGACAGAATGACAATGCAGTAAGAATAGAGCCTTCTTCCTTGGGTGAGGAAGAAGACAAAGAGGCCAAGGATAAGAACTCTGCCTTGCAGCTAAAA
SPP2	YOR148C.line.98.chrXV.608640.609197_tile_1	YOR148C.line.98.chrXV.608640.609197_tile_1	Saccharomyces cerevisiae	R64-2-1	chrXV	608554	608976	+	ACATGCATAAAATATAATGTGTATATACCAAGTACTTTAAATTATATATTCAAACTTTCTCATGACTTATTTTTTTTGTCGTCATCAACTTTAGTGCCCGTTATTTTATCGATTTTTACGACGGGCATAAATGAAGCCTCCTCCACGTTTATTGCCTTATTTAACTTGGCACCAATTCCCAGTCCATCAGGATGTATCTGTGAAACATTTGAAACGTCCTTGTTTCGACTCTGTGTCTTGTCGCCTTTAGAATCTTGCTCGGAGTCACTTTCCCACCCCATACCCCGAAGTAAAGCATCTCCAAATTCCTCGACAGGTACCTCATTATATTCTTTTTCGGTGACATATTCCACCAGAGGAGCATCGTTT
SPP2	YOR148C.line.98.chrXV.608640.609197_tile_2	YOR148C.line.98.chrXV.608640.609197_tile_2	Saccharomyces cerevisiae	R64-2-1	chrXV	608922	609344	-	ACCCGACCGTGCGTAGAAAAAAATGTAAAAATATAGGAATAGCTGTTTTAAGTTATTAAGGTAATAATGCACGTCGAGCGATGGTAGGTAAAATGTCTAGAGGCATATCTAGGATGTAGAATGAGCAAGTTTTCACTTAAGTTGGGGAGTAAGACCTTGAAAAAAAATATTTCCAAGAAGACGAAAAAAAAAAACTCATTACAGAAGGCCAACTTATTCGATTGGGATGATGCGGAAACTGCAAGCCTTTCGCATAAACCTCAAAGTAAGATAAAGATTCAAAGTATTGATAAATTCGATCTTGATGAAGAATCATCTTCTAAGAAGAAATTAGTGATCAAGCTGAGTGAAAATGCGGATACCAAAAAA
SME1	YOR159C.line.99.chrXV.633282.633566_tile_1	YOR159C.line.99.chrXV.633282.633566_tile_1	Saccharomyces cerevisiae	R64-2-1	chrXV	633254	633700	+	TTCAGTCCGCTGATGTTATCAATGTGATATTATCGCCTTTCAACAGGATCTTCCCCAAGGGCGTGCCCTTCTCCACATCTTCTTTACCATCGGCACTATTCACAGGAATTTCCACGGCTTCATCGATGACAACATTCATGAACTCATCAAATCCAACTATTTTACCCTTGATTCTTATGCCGATTTGCTCGAATAACCATATCGTTACTGGTGTTTGCTGTTGTAAGAAGTTAAATATGCAATTTATTGGTGGCACCATGGCCTTGGTTTTAACTTTGTTCGACATTCCAAGCCTCTTGTTTTTCGCTCTATATCCTTCCTGTGTTCCTTAATCTCCTTTCCTTAGTATTATCTCTTACCTTTACCATCTATTATTGTTATTTCACTTCAATT
DED1	YOR204W.line.100.chrXV.722911.724725_tile_1	YOR204W.line.100.chrXV.722911.724725_tile_1	Saccharomyces cerevisiae	R64-2-1	chrXV	722881	723289	+	TATGGCTGAACTGAGCGAACAAGTGCAAAATTTAAGCATCAACGACAACAACGAGAATGGTTATGTTCCTCCTCACTTAAGAGGAAAACCAAGAAGTGCCAGAAATAACAGTAGCAACTACAATAACAACAACGGCGGCTACAACGGTGGCCGTGGCGGTGGCAGCTTCTTTAGCAACAACCGTCGTGGTGGTTACGGCAACGGTGGTTTCTTCGGTGGAAACAACGGTGGCAGCAGATCTAACGGCCGTTCTGGTGGTAGATGGATCGATGGCAAACATGTCCCAGCTCCAAGAAACGAAAAGGCCGAGATCGCCATATTTGGTGTCCCCGAGGATCCAAATTTCCAATC
DED1	YOR204W.line.100.chrXV.722911.724725_tile_2	YOR204W.line.100.chrXV.722911.724725_tile_2	Saccharomyces cerevisiae	R64-2-1	chrXV	723233	723647	-	AACTCTCTAGTTGGAGCCATAATGACAGCAGTTGGGTAGGCCTTTCTTTGGTAAAAGGAGCCTTGAGACTCTGGTTGAGGAGATGGTCCAGTCTTAAATGATTCGGACAACACTGGGAATAAAAACCCACCAGTCTTACCAGAACCGGTCTGCGCACAGGCCATCAAATCTCTGCCGTTGGCAACGATAGGGACGGAGTATTTTTGCACAGGTGTTGGCTTGGTGAAACGGGCCAATTTGATGTTTTCCAATAACAATCCGTCCAATGGAGGTGAGGTAAATTCTGTGATTGGTTCAGGAACATCCTTACCAGAGGCGTCCACTGGAATATCATCGTAGTTATCGAAGTTAATACCAGAAG
DED1	YOR204W.line.100.chrXV.722911.724725_tile_3	YOR204W.line.100.chrXV.722911.724725_tile_3	Saccharomyces cerevisiae	R64-2-1	chrXV	723593	724019	+	TGGCCACCCAAATTTTCGATGAAGCCAAGAAATTTACTTATAGATCCTGGGTCAAGGCCTGCGTCGTCTACGGTGGTTCTCCAATTGGTAACCAACTAAGAGAAATTGAACGTGGTTGCGATCTTTTAGTCGCTACTCCAGGTCGTTTGAATGACTTGTTGGAACGTGGTAAAATTTCTTTGGCCAACGTCAAGTATTTGGTTCTAGATGAAGCTGATAGAATGTTGGATATGGGTTTCGAACCTCAAATTAGACATATTGTCGAAGACTGTGATATGACTCCTGTTGGTGAAAGACAAACTCTGATGTTCTCAGCTACTTTTCCCGCTGATATCCAACATTTGGCCCGTGATTTCTTAAGTGACTACATCTT
DED1	YOR204W.line.100.chrXV.722911.724725_tile_4	YOR204W.line.100.chrXV.722911.724725_tile_4	Saccharomyces cerevisiae	R64-2-1	chrXV	723965	724385	-	TAATCATCGACATCACTTGGTAAATCGTAGTTGATAACGTGGGTGACGTTTGGAATATCTAGACCTCTAGCTGCGACAGCTGTGGCAACCAATAAAGTAGCGGCACCAGATCTGAAGGCGGCCAAGGCACGTTCTCTCTCAGATTGGGTACGGTCACCATGAATGGCGGTAGCTCTAAAGTTTTGCATGATCAGGAAATCGGTCAATTGATCTGCCATTCTCTTAGTTTCGACAAAGATCAAAGTCAAACCGTCAGTGGATGCAGACAATAGATCCAATAAGGCTGACTTCTTATCTTGATTTTCAACGTATAAGACTTTTTGAGTAATGTTTTCTGAAGTAGAACCGACTCTACCAACAGACAAAA
DED1	YOR204W.line.100.chrXV.722911.724725_tile_5	YOR204W.line.100.chrXV.722911.724725_tile_5	Saccharomyces cerevisiae	R64-2-1	chrXV	724331	724769	+	ACGTCCATAGAATTGGTAGAACTGGTCGTGCCGGTAACACCGGTCTTGCCACTGCCTTTTTCAACAGTGAAAACAGTAACATTGTTAAAGGTTTGCATGAAATTTTGACTGAAGCTAACCAAGAAGTCCCATCATTCTTGAAGGACGCTATGATGAGTGCTCCAGGTAGCAGAAGCAACAGCCGTAGAGGCGGTTTCGGTCGCAACAACAACAGAGATTACCGTAAGGCCGGAGGCGCTAGCGCAGGCGGCTGGGGCTCTTCAAGAAGCAGAGATAACTCTTTCAGAGGCGGTAGTGGCTGGGGTAGCGATTCCAAGTCTTCTGGCTGGGGTAACAGCGGTGGTTCAAACAACTCTTCTTGGTGGTGATTTCAGACAAACTAGGG
DED1	YOR204W.line.100.chrXV.722911.724725_tile_6	YOR204W.line.100.chrXV.722911.724725_tile_6	Saccharomyces cerevisiae	R64-2-1	chrXV	724715	725153	-	CAATTAAGCAAAAATAGTGGAAAATATAGTAAAAGTAGATAATAATTCCTTCATCTTTTCACTAAAAGATGAAAATCTTAATTGCTTATAATCATAGTGAAATCTTTAGTTTTTTAGTTAATATTAGCAAAGGCATTTTATAGTACAATTGTAAAATAATATTAGAACCATGAAAGAAAAAAAAAACAAAAAAACGATGGATAAAAAATAAGAGTGGAAAAAAAGTAACAGATTAGTGGCTCCCAGTGAGAAAATAAAAAAAATATGGGGCCAATCAACGGCTAGAGAGAAACAAACAACACAGTATTTTCAGGACTTGGATAAAAAAAGTGATTGGAGAAAGAAAATATAAGACATGCTAGAGCAGAAAACGAAGAATCCTCAC
SNU66	YOR308C.line.101.chrXV.894624.896387_tile_1	YOR308C.line.101.chrXV.894624.896387_tile_1	Saccharomyces cerevisiae	R64-2-1	chrXV	894594	894996	+	TAGGTTAATTGTCATCAAATTCAAACAAACTACCATTTTCAGGGGTATTTTTCCTTGCTTCAATTCTGGATTTCATTTTTGCTCTCTTTTTCTTGTTGCTTTTTGTACCATGAAATTTCTGTGACAGTTTTTTATATGCCTCCTTAGTAGTCAGTCGATTTCCCTTTTCGTCTCTGTAAACCAGTTTTATGTCAGGATCATAATGATCTTGTCTTTTTGAATGAGTATTTGCATTGGAAGAGTCACTAGATGTGAATTGTTCCAGTCCGTGTAGCTTATCTTTTGTATAAGTGCCAGTGCCCGTATGCTCTTTATTTCGGACATCCCTTCGAAGTGATTCACTATTATTA
SNU66	YOR308C.line.101.chrXV.894624.896387_tile_2	YOR308C.line.101.chrXV.894624.896387_tile_2	Saccharomyces cerevisiae	R64-2-1	chrXV	894942	895348	-	GCACTGAAAGCATTTTGAAAATGCGTGAAATTTCCAACAGTATTGTCGTCGACGAAAAGGTAACTTTTTTAAATACTTTGGATACCAGTCTCTCCGAACGAAGTGCTACTGAGAATAAAGTGAAAGTGCATGGTGAAGGAGAGAAAAATATCGGAGATGTTACCAATGGACATACTAAGGAAGGGAGTGGAAACAATACACTGACTGAAGCAGTTAATAATGAACCAAACTACGAGGGAGATGCTGAAAATGCACCGAACTTTTTTTCTGGTCTTGCATCAACACTAGGATATCTTCGGAAAAAGAGTGTTTTCACCACAGGAGACGTCGATTTGAAACCAGGAAAGGATGTT
SNU66	YOR308C.line.101.chrXV.894624.896387_tile_3	YOR308C.line.101.chrXV.894624.896387_tile_3	Saccharomyces cerevisiae	R64-2-1	chrXV	895294	895730	+	CGTCGCTTCTCTTCGTCTCTTGCCTTTTCAATTTCTCTAGCGAGGTCCTCTGGCCCTTTCAATTCATTGTTTGAGCTTGTTCTGGGATTTATTATGGTGACTGGCTGTTCTTCTTCCATCCAGGATAAACTTTCATCTTCATCTACTAACTTAACAATTTCCATCTTATCAGTAATTTTTGACTTCCTAGCTTTAGTAGATCTTGGGTCCTTGATCTTACGTTTTTTAATTTTTAAAGGTTTAAAGTCTCCACCATCTTCATCTGACATATTATTTGCGCTATCGAAATTCACTTTAACTTTTCCCGTTGGTGGTTTTGCTGATATAGTATTCGGTGCCTTCATAACACCCTGTTCTGCTCCGATGATTAGATGTGTAGTTGT
SNU66	YOR308C.line.101.chrXV.894624.896387_tile_4	YOR308C.line.101.chrXV.894624.896387_tile_4	Saccharomyces cerevisiae	R64-2-1	chrXV	895676	896086	-	TAGAAAACATGGATGCAATTCCTTCCTCACATGAATCCAAACGTTCCAGCACATTGCCAAGAAAAGGCGCCACGAAGGAAGACGAAAATATTGATCTGCATAATGTTCAAGTATCATATAATATCGAGGCGCTTAGCCCAAAGAAAGATACGATTCTAACTTTGAAAGAGAGCAGTATTTTTGATGATACTGATTCTACCGAAGTGTTAGAGAATGTGAAAGCTGCCGAGGAAAACGCTGATAGAGAGAAACTACGATTACGACAAATGAATAAAGATAGAAGACAAAAAAAAAAAATTTTAAATGTATCTAGCTTAGATATTGAAGAAGAAGAAGAAGGAGAGAAACACTCAATTA
SNU66	YOR308C.line.101.chrXV.894624.896387_tile_5	YOR308C.line.101.chrXV.894624.896387_tile_5	Saccharomyces cerevisiae	R64-2-1	chrXV	896032	896464	+	AGCCATGAACTGTCGTCATTTACATTAGTTTCTTCGAGAAGGTGCGCCATTCGTAAAGGAGCGTTCGCCTTTTTTTGAAACTTTGTTATCTTCTCTCGAAGTTCATCGATTTTGGATGTGTTATGTACATTAGGGGGAGAAGAATTGAAATTTTGTTGGGGTGGGATAAGTTTTAGGCCAAGGGACGCCCTCAACTCATTCGTCTCTTCGATTGACAAAGACTCTTTATGGTCTGTATTCTTTTCTTGAAAAACTGGAATAGGTTTCATACCCAGCTTTTCCCTTATTTCATTTGTCTCCTCAATAGAAAGGTTTTCCGTTTTGTTCATAAATTAATTAAGGGTTGATGTGATGATTGCCTTTTTATTAATATCAAATA
HSH49	YOR319W.line.102.chrXV.912822.913463_tile_1	YOR319W.line.102.chrXV.912822.913463_tile_1	Saccharomyces cerevisiae	R64-2-1	chrXV	912792	913236	+	TTGATGAACTACAGCGCAGACTCTGGTAATACAGTTTATGTGGGGAATATAGATCCAAGGATAACGAAAGAACAACTTTATGAACTCTTCATTCAGATCAACCCTGTTTTAAGGATTAAGTATCCGAAAGATAAAGTTCTACAAGCTTACCAAGGCTACGCATTCATCGAATTTTATAATCAAGGAGATGCTCAATATGCAATAAAAATAATGAATAATACCGTTAGATTATACGACCGACTGATAAAGGTTCGTCAAGTAACCAATTCTACAGGAACAACTAATTTACCTTCAAATATTTCTAAGGACATGATTCTACCTATTGCTAAGTTGTTCATAAAAAACCTTGCAGATTCGATAGATAGCGACCAATTAGTGAAAATTTTCAATA
HSH49	YOR319W.line.102.chrXV.912822.913463_tile_2	YOR319W.line.102.chrXV.912822.913463_tile_2	Saccharomyces cerevisiae	R64-2-1	chrXV	913182	913629	-	AATTTTCAAAAAGTGTAAAAATTAGTATAGTCGGAAACGCATATATATATATCATAGTATTGATAATGTTTCTGCCAAGATTGTGTCCGTTATCGCATTTTCTAACGGGTAAGGTATGTACTAGGTGAGAGCGGGATCTTATTTCAACATGTTGTGCTTTAATGCTTCTTTATTCAACAGCCTGTCAACGTCATCACCGTATTTTGCGTTACCTTTTCCATTTTCTTTGAAGGCATAATCAACAGTAATTCTGTTGTTGGCGACTAACTGATTGTTCAAAGATTTTATTGCCAAATCTGCTTTTTCAAAGTCCTCAAAATAAACATAAGCACACTTTAATTTTCCGTTTGATAGGTAGAAAATTTCGGGTTCCCTTATGAGCTTACCAAATTT
LEA1	YPL213W.line.103.chrXVI.150614.151330_tile_1	YPL213W.line.103.chrXVI.150614.151330_tile_1	Saccharomyces cerevisiae	R64-2-1	chrXVI	150580	150998	-	CGCTCTACGCAACCTTTGAAGATCTTCAAACCTTCTTATGCTGTTATTCGATAATGTAAGGTTCTGTACATTCATAGGCAATAGGCGACCGTCTACTTCAACGATATTGTTTCGGCCCAACAGTAATGTATGTATATCGTCTCTTCTTGATAGATCTGGAATCATGATAAGGTCATTGTTTGTCAAATCCAAGATGTGCGTAGGTTTGGTCAAATGCTTTAAGCTGGATGGCATGGATTCTGAATCCGTTTCTAGCTGCAGGTCTCTTAAAATAACACATTTATCCACGTTATACTTGCCATTAAAATGATCAACATAATATTGCGGAGCATCAATAACTATGCTAGGGGTGAACTTCATTATT
LEA1	YPL213W.line.103.chrXVI.150614.151330_tile_2	YPL213W.line.103.chrXVI.150614.151330_tile_2	Saccharomyces cerevisiae	R64-2-1	chrXVI	150946	151366	+	GCCCAGGACGTTGAAGAATCTAACTTTAATAGGGAATCAAGTATGTCATTTAGCCAATTATAGAGAACATGTACTTCGATTAGTACCGCATTTAGAGACTTTAGACTTTCAAAACGTAACAGCTGAGGAAAGAAAGAGCGCAATGAGCTTTCCAAGGCAGGCGGACGGCGATACGTTGGGCCCAGTAAATACTGCAATAAGAGATAATGGATCCAGAGATAAAACGATGGAGATCATGAATTTGGTGGTGAGTAAGATGACAGTAGAGAGAAGAAATGAATTGAAAAAGCAGTTAGCAGAAGCTACTTCTTTAGAAGAGATTGCCAGGCTGGAAAAACTACTCTCTGGTGGTGTTTAATCTTTTGGT
LEA1	YPL213W.line.103.chrXVI.150614.151330_tile_3	YPL213W.line.103.chrXVI.150614.151330_tile_3	Saccharomyces cerevisiae	R64-2-1	chrXVI	151312	151744	-	CGGGACCTGCTGTGCAAAAGAGTATCTTCGAATTCTTGACAGCTAAGGGTATCCCAGGTCTTACTGATGCGCCCGAGAGCAATAAGAAGATTAAGCAAAGAAAAAGAATGGAAGAGGAGGAAGCTGCTAGTAAAAAGGCTGAAATATCCAGCACCACTCAGAGCAACGAACCTGAAGTACAACCGGAAGCGGCAGCTAATTAGGTTGCCCTTTCCTTCTTTCTTACCAACTTTAATTTCTAAGGCATTGACATTGAAATTGACATTGTCCTCTAATGTTTATAGAGCACCATTATTTGTTTTCGTTTTATATATTATTATATAATGGCACAGAATAATTTATAATTCTTTTTTTTTAAGTCATTGAACAGTCGCACTAA
CBC2	YPL178W.line.104.chrXVI.212158.212784_tile_1	YPL178W.line.104.chrXVI.212158.212784_tile_1	Saccharomyces cerevisiae	R64-2-1	chrXVI	212112	212555	+	AATAAATAAAGGGAAAGATGTCCCTGGAAGAATTTGACGAAGTTAAATATGATCATTCAACTAAACGCCTAGATACACCATCAAGGTACCTGCTGCGCAAGGCTAGAAGAAACCCTAACGGGCTACAAGAACTGCGTGAGTCGATGAAGTCATCCACAATTTATGTAGGAAATCTTTCCTTTTATACATCAGAAGAACAAATTTACGAATTATTCAGTAAATGTGGCACAATAAAAAGAATAATTATGGGTTTGGACCGTTTTAAGTTCACGCCATGTGGCTTCTGTTTTATTATATATAGTTGTCCAGATGAAGCATTGAATGCCTTAAAATATTTGTCCGATACAAAGTTAGACGAAAAGACAATTACCATTGATCTAGATCCTGGT
CBC2	YPL178W.line.104.chrXVI.212158.212784_tile_2	YPL178W.line.104.chrXVI.212158.212784_tile_2	Saccharomyces cerevisiae	R64-2-1	chrXVI	212502	212946	-	TTTTTTTTTTTTTTTTTTACATAACAGCATCATGCAAGCCTTTAAAAATAATGTAGGTATGTATATATACAATAATATATATATATATATATATATCTGTGTGTAGAATCTTTCTCAGATATAAATTGATTGATTCTACTGAGGTACGTAGTTATCATCTTCTCTTTCTTCATCGAAACCTGGTCTGAAAGTACCCATTGCATCAGGAGGAGGGATATAATTATTCGTATTAGATTGTGAGCTACTGTTATCAAATCTGGAATGTGGTACGCCGACACGCTCTGCAAATGGAATGGCGAAGCCACCTCTGGATGCATCAAAATCGAACCTCAATTCATCGCTGACTTGACCACCGCTCTTACCACGACCAAACTGTCTTCCATCTTCAAAA
PRP46	YPL151C.line.105.chrXVI.266180.267535_tile_1	YPL151C.line.105.chrXVI.266180.267535_tile_1	Saccharomyces cerevisiae	R64-2-1	chrXVI	266152	266554	+	ACTAAAATCTTTTGGCGCTTAAGTTGGGGTTCCACGCTAGCCCCGGTTCTGACTCTTTTGTAGCCGTCTCATCCTGTTTCCAAATCTTTATGCTTTTGTCTGCTTCTCCAGTGATTAATCTTAAACCTGTTTTATCGAAAGTGCTACAAAGAACACTCCGTTCACCTTCCAGAGAGCCTACCATTTCTCTCGTGGCCAACGATTGGTATTTGTGACCAGACTTATAATCATAAAAGGAAAGCACACCATTGTCACCGCCAGCGAATAATACATCATCTTGATTAATGCTTAAAGTATTGATTATGCCTGTCTTTTCAGACTCAAAATTGGTGAGTAAAGACCCCTCTGC
PRP46	YPL151C.line.105.chrXVI.266180.267535_tile_2	YPL151C.line.105.chrXVI.266180.267535_tile_2	Saccharomyces cerevisiae	R64-2-1	chrXVI	266500	266942	-	ATGCTGGGACCTAGAGAAAAACCAAATTATTAGAGATTACTATGGACATTTATCGGGGGTTCGTACGGTGAGCATACATCCAACGCTGGATCTCATAGCTACCGCAGGCCGAGATAGCGTTATCAAACTCTGGGATATGAGAACCAGAATACCTGTTATTACACTAGTTGGGCATAAGGGTCCAATCAATCAAGTACAGTGTACTCCAGTAGACCCTCAAGTGGTGAGTTCATCGACTGATGCTACGGTAAGGTTATGGGATGTAGTTGCTGGGAAAACAATGAAAGTTCTAACACATCATAAGAGGTCTGTGAGAGCTACAGCGTTGCATCCTAAGGAGTTTTCGGTGGCTTCTGCGTGTACTGATGACATCAGATCATGGGGATTAG
PRP46	YPL151C.line.105.chrXVI.266180.267535_tile_3	YPL151C.line.105.chrXVI.266180.267535_tile_3	Saccharomyces cerevisiae	R64-2-1	chrXVI	266888	267326	+	TTTGACCGTCTTATCTTCACTAACAGAAAATAAATAAGGATGTCGATCTGACACAGCAACGTCTCTCACTGTCATTACATGCCCTGCTAAGGTAGTTTTTAATTTTCCTGTTGCAAGATCCCAAACTTTCATTGTCGTATCATTACTTCCGGTGATGAACCATTCGTTGTCAACAGGATCGATTGCAACGCATCGTACCCATCCAAGATGGCCATTGATAACGCGTGAAAGTTTCCAGGGTGCATGCCATTCCGGCCTTTGTGACAGAAGTTTTTCGTATCGATTAACTATAAGTTCTTCAGCAACCTCTGGTTGGAAAATTTTATTCACAAAAGCAGATGCATGCGTATCGTGATCTTTCTTGCTAATCACTGCTTGTGATGCT
PRP46	YPL151C.line.105.chrXVI.266180.267535_tile_4	YPL151C.line.105.chrXVI.266180.267535_tile_4	Saccharomyces cerevisiae	R64-2-1	chrXVI	267272	267700	-	TCTAATACGGAAAAGCTACAATTTTGGCAATAAAAGATTATTCAAGATGTGAAGCTAACAGTAATTATTACCCACTTCATTGCATCTTAAAACCATTTCCGAGGATGCAGACACTGTGTTACATGGAGATTAGTGAGAATGGACGGAAATGATCACAAAGTCGAAAATTTAGGAGATGTAGACAAATTTTATTCCAGAATACGCTGGAATAACCAATTTTCATATATGGCCACTCTGCCGCCCCACCTACAAAGCGAAATGGAAGGTCAGAAATCATTGCTAATGCGATATGATACTTATAGGAAGGAAAGTTCTTCTTTTAGTGGTGAAGGCAAGAAAGTTACTCTGCAGCATGTTCCTACAGATTTTTCAGAA
CWC27	YPL064C.line.106.chrXVI.428711.429616_tile_1	YPL064C.line.106.chrXVI.428711.429616_tile_1	Saccharomyces cerevisiae	R64-2-1	chrXVI	428677	429079	+	TATTTCACTTTAGAATATTCTTGTTTTTTATTCGTTCTTGAAATTTTGACAACATTGCCAAAGTTTCCCGCTCTCTTTTATCCATTGGTTCTTCCTTGATGTTTTCTTGACTTTCCGTTTCTTTAGTGGTTGCCTCATCAACATTATCATGCAACTCCGTCTTTTCCCTAATTAGTGCCTCTTGTGGCTGATCTAAGGATGCGTCTAGTTTAATTCCTTCACTGCGACTATCATCTTTGATCCATGCTGGGAGAATCATTCTCTTTCTTGGCTTAAGCTTTTGAACATCACCATCATCATCCTCTTGCTCATCTTCATAAACCATCTTTACTTTTGCTGATTTCACAAGT
CWC27	YPL064C.line.106.chrXVI.428711.429616_tile_2	YPL064C.line.106.chrXVI.428711.429616_tile_2	Saccharomyces cerevisiae	R64-2-1	chrXVI	429027	429448	-	ATAGTACTGGTGAGTACCGTACAGTTGCTGAGGAAAAAAATCCTCGTATACGCTTCAATAGAGATGGACTCTTGGGATGGGATAGACGAAGGAACACATGGTTTATAACTGTGCTGGCGGATTCTAAGCACGTACTGAACGATTGTAATGTATTTGGCAAAATTGTTGGGAAATCTATTTACATCTTTAGAGAGATCTTGGGCGGCGAAATTGAAGCTTCCTCCCGTGACAATGATGTCAAACGATTCATGTATCCTGCAGTTTTGAAGGATGTTGAGATTACCATACCATTCTTTGAGGACATCTTTGGATCAAAAAGAAGACTGGAAGATAATGAAAAAAAAGAACAAGAGCCGGCAAAGAAA
CWC27	YPL064C.line.106.chrXVI.428711.429616_tile_3	YPL064C.line.106.chrXVI.428711.429616_tile_3	Saccharomyces cerevisiae	R64-2-1	chrXVI	429393	429831	+	TTTGCATTAAACATTAGCCACTGTGTTGGCTTTAACTCTTTAAATTCTCCATTGGTGAATGTGCCATCTGAGAGCATAGATAAGAACCTCTTACATGTCTCAGGGCATTCTTTAGCCCATAATTCAATGGCAATGTTCCCCTTTGTTGTATACAGTATACATTTAGCTGTTGTCTGAGGTTCTATATTACTGGACATAGCATTCTTACTTTGGTTTAAAACTCATCATACATGTTTCCTGTAATACGCTTTGAATAATAAATTATTCAATAAATTATTCTCAGGACATTTTGAACCTTTTTTTCTCTTCAGACGCTTTACAGCGGAAAAGGAAAAAAAAAAAATTGGAAGTTCTTTCAGTAAAGTGAGATATATTCAGCAAACGA
DIB1	YPR082C.line.107.chrXVI.704225.704656_tile_1	YPR082C.line.107.chrXVI.704225.704656_tile_1	Saccharomyces cerevisiae	R64-2-1	chrXVI	704197	704609	+	ATTATGAAACACGCTTATGATTATAATCGTATGGAGAGACCACCAGCCCTTTGTTCTTCCTGGCACCTCTGAATATAGTTTCTAATATGTCAATCATTTCTTGTTTGTCGTCTACAATAAAGTTCAACTTGTTGTTGTTCCCTGTACCAAAATCACACATCATGTGCTTATTGTGGTAGAAAAACATTACTGTCATGGGATCCGTCAGCTCGTACATCTCATCAAAATCTGAAACTTCATCTATATCACATAAATAAATAACTGCAAAGTTCCTTACTCTTTCAGCAATCGAAGATAACAACTCGTCCATGATCATACATTGTCTATCATTTTTGCGACCAAAACGAATGACAACAAGT
DIB1	YPR082C.line.107.chrXVI.704225.704656_tile_2	YPR082C.line.107.chrXVI.704225.704656_tile_2	Saccharomyces cerevisiae	R64-2-1	chrXVI	704555	704965	-	GATCCTTATCCATATTTGACCTCGAATTTCCCGAATTGAGTCCCTTTAATTCATAGCCAGGCTTTACTGTACCGTTTTCATCCATGCTATAGTAGTAAGTGTTCTCTCTGGAGGGTTTTTAACTGTTTCTTTGCTGTTGTACAGTTTACTGCGAGGAGATGACTCGTTGTATTTCTTTTGGGCCAATGACCGCTTCGCAAAGTGGAAAAACAGAACTTACATACCAAATTCGATCATCGGATAGAAATAGTACGTAGAGAAAGAGTAAGAAGTCAAGTTTTGATGGCTAGTGTTTTGTTGCCTCAATTGCGTACGGGATGGCATGTGGATCAGGCTATTGTTACCGAGACTAAACGA
RDS3	YPR094W.line.108.chrXVI.720637.720960_tile_1	YPR094W.line.108.chrXVI.720637.720960_tile_1	Saccharomyces cerevisiae	R64-2-1	chrXVI	720609	721037	+	AAACATGTCCCGCCATCAGTTTGATCTAATAATGTGCCTAAAGCAGCCTGGTGTACAGACAGGTCTTCTTTGTGAAAAATGTGATGGCAAATGTCCTATCTGCGACTCTTATGTAAGGCCCAAAAGGAAAGTTAGAGTATGTGAAAACTGTTCGTTTGGTAAACAAGCTAAAAATTGTATAATTTGTAATCTAAATGTTGGAGTCAATGACGCATTCTATTGTTGGGAGTGCTGCCGCTTAGGTAAAGATAAAGATGGCTGTCCTAGGATCTTAAACCTTGGCAGCAATAGACTGGATAGACATTTCGAGAAAAAGAAAAAGGTATAACACATACATATAGAATATGTAAAAATATATAAATAAATAACATGCATTTA
SNT309	YPR101W.line.109.chrXVI.730492.731019_tile_1	YPR101W.line.109.chrXVI.730492.731019_tile_1	Saccharomyces cerevisiae	R64-2-1	chrXVI	730462	730910	+	TTGATGGACGGCCTTAGCTTTGTTGATAAAGGGAAAATACCAGATGGTTACAAAAATGAAATAGATCAATTAGTAAAGAAGGAATTTGCGAATATAAAAAGAGAGCCTGTTCATCCCGAAATACGAGGTATACTTGCGAAGAGAAAGGGGGCCGATAATAGTGTTTCTACGCTTACAAATGCATTGTACACCGAATACTTGAAACAACGTAATAACAAAAAAAGGCGAACACCGGATTTTAATGACGACGATGATACTTTATTTTTGGAAGAGTATAGAAGGAAATACCCGAGGATTGATACTTCCAGATACATACCGAACGAGTCTTCCGAAGTTAGCTTGTTAGGAATTGTAGATTCTTATTTAAAACATCAGGAAATAGTTTTGGATACACT
SNT309	YPR101W.line.109.chrXVI.730492.731019_tile_2	YPR101W.line.109.chrXVI.730492.731019_tile_2	Saccharomyces cerevisiae	R64-2-1	chrXVI	730854	731264	-	TTTTGGACAAATAATTTAATTAGTTTGTGAAGAAATATAATACATTTATATACTCATATCTATGTTTTTTTTGTAACCAATTAATAAAATTATGAATTTTAAACCAAGATGAAACTCTATGTTATTGTACATGCGCGCTAAGGACTTCTATGGCGAGCGATCCAATATCCTTCCACGATTTGCCGCCACATTTATAATAATAAAGGTCCATTGCGACATTATAACCTCTTTCTGTATATTTCCAAATCGTTAATTTGTTTCCTCTGCTGGATGTTCATTTCTTCCACTATAGTACACGTTTGACGAATATAATCATTATTAATTCTCCATTGATTCGATACCGTTTGCGGTAGAA
URN1	YPR152C.line.110.chrXVI.832061.833458_tile_1	YPR152C.line.110.chrXVI.832061.833458_tile_1	Saccharomyces cerevisiae	R64-2-1	chrXVI	832035	832474	+	CCTATTCCGGATTTATCGGCTCGTTCCCCGCGCCCACTGGGGTAAACCGGCTTGATGGCCCGACCTCGGCGGCTAGCCACCGCACCCAGACCACGGTCTTCTCCAGAATGCCCACGACGTAGTAGCGTGGTTCCGTCACCACTATTGGGCTGACACAACACCTGTGCTCAATGCTCAGCAATATATCCTCTATACTACTACTGTCCGCGGGTGCTTTCAGAAGTGTTTGCCATCGGTCGATAAGCTCTTTGTCCTGACGCAGCGATTCGACTGCCCCCGTAAAGTCTCGTTCGTGATCCCGTAGGCAATCGCAGAAAATCTCTTTCCGCTGTTCCAAGTCGAACGTCTTATAATAAAACAGCAGTTGGGAAACGAATTTGTCTTGGTCG
URN1	YPR152C.line.110.chrXVI.832061.833458_tile_2	YPR152C.line.110.chrXVI.832061.833458_tile_2	Saccharomyces cerevisiae	R64-2-1	chrXVI	832421	832863	-	TTGATACAGATGACATTGACGAGCGTAATATCTTCTTCGAATTATTCGATAGGTATAAACTAGACAAGTTTTCCACGTGGTCGCTGCAAAGCAAGAAAATCGAAAACGATCCTGATTTTTACAAGATCAGAGATGACACAGTTCGTGAAAGTCTTTTCGAAGAATGGTGCGGCGAGCGCAGTGGCAATGCCACCGCTGAAGAAAGCGATAGCGAAGATAATAGCGAAGACGATAGCGAAGTACTAGAACCAACAAAATACCATTATCTGGCACAAATTGTTGCTAATGCGGGAACAATCGCACCCGACACCATCCCACAAGATATAAGGAAACAACAAAAAGCGTTATACAAGGCCTACAAAATCAAGGAGTATATACCGTCGAAGCGC
URN1	YPR152C.line.110.chrXVI.832061.833458_tile_3	YPR152C.line.110.chrXVI.832061.833458_tile_3	Saccharomyces cerevisiae	R64-2-1	chrXVI	832809	833211	+	ATACGATTCAGATCATCGATAATGCTGATATCTTGATTTACAATTTGTTCTTCATTCTCTTCGTCTTCCTCTTCGTCTTCCTCTTCGTCTTCCTCCCCCGAAGATGAACCATACCCGCTGACTAGCCCAGTGTGGCTTTCCTGTAAAGGGGATTTTACGTCACCCGCCTCTTCGCTGATCTCATCTTTTCTCTCAACTTCGTCTTGATTTCTTTTAAATAGATGAATCTCTTCGTTGCAAGATTCGAGGATTTTATCAATGTCCTCCTCCCGCATAGTGTAACCTCTGGCAACGCCAATCAGAAGAACCAGTTTTTCCTTATCTAACGACTCGATTAATGAGCGACACC
URN1	YPR152C.line.110.chrXVI.832061.833458_tile_4	YPR152C.line.110.chrXVI.832061.833458_tile_4	Saccharomyces cerevisiae	R64-2-1	chrXVI	833157	833573	-	ATATAATTGAAGAAAGAGGAAATAGTGTCCGAAAGAGATTCTGATATGTATTATAAAGAGAAAGACAGTTCAGTAACACAGAATCGCCATGCGTGGAGAATGGCAGGAATTTAAGACACCTGCAGGCAAAAAGTATTACTATAATAAGAACACGAAGCAGTCTCGATGGGAAAAACCTAATTTGAAGAAAGGCTCTAACCTAGAAAGCAATGCGAAAGAATCACAGACAGAGAGGAAGCCAACATTTTCATTAGAACTGGTTAATGGTTGGCACTTAATAATATACAACGATGGTACAAAACTTTACTTTAATGATGACTCTAAGGAGTTCAAAAATGACATCAGTCAAGAGGACGACAGCAG
PRP4	YPR178W.line.111.chrXVI.892332.893729_tile_1	YPR178W.line.111.chrXVI.892332.893729_tile_1	Saccharomyces cerevisiae	R64-2-1	chrXVI	892304	892704	+	TATGAGTAAATATATTGCACTTGAAAATCTTCCGGTAGATTTGCAACATAAAGGAGCTACACAAAATGAAAGCACCGCTGATATACTGAAACAGTTGCCACATGAACGATTACAAGCTGTCCTGGAGAAGATACCAGAAGAAGATCTTGAGGTGAGACGATTGCTTTCAATTTTAAAGAAGCCGGAAGTAGTGGAGAATGAAGATGTACAACAAAGAAGAATACGGTTGGCTGAAATTTTAATGGTTGATGAAATTGATCTTGAGAACATTAATAACATGGAAAACATAAATGGGGAAGAAGTAGACGAAGAGGACGATGAGGACTTCTTCACTCCAGCAACATCTG
PRP4	YPR178W.line.111.chrXVI.892332.893729_tile_2	YPR178W.line.111.chrXVI.892332.893729_tile_2	Saccharomyces cerevisiae	R64-2-1	chrXVI	892652	893096	-	AAAGTTTTTGATGAGCCCGTCTTCTGCGCATGAAATCATTTGATTGTTTGAATCAGGATGCCAATCTATAGCTCCGATTTTCCCTACATGAGAGTCGAGTTTTTGTGTCAATGGCTGCAGTGTTTGAGAATTTAATACCTGAAGATCACCTGCCCAGCTTCCCGTTGCGACAACCATGTCATCGGTAGATAAAGAAACTGCGGAAATAGGCTTCGTAGATACTAATTGAGAGCCAGCAAGCTCTAAATTAGCCATACGCTGTAATTCTGTACGCCGACTGAGTAATTCCTGTCTTGTATTGAACTTTTGATGTCTTTCCATCTCTTTCTGTAGCCTCTTTCGAGATCTTTCAAGTGAATAATTTATCAAAAATCTTCTCGCAAAAATGAGCTC
PRP4	YPR178W.line.111.chrXVI.892332.893729_tile_3	YPR178W.line.111.chrXVI.892332.893729_tile_3	Saccharomyces cerevisiae	R64-2-1	chrXVI	893042	893481	+	TCAATACTCAAACGAAGAGGGCGGCCTTCGATTATTGGGAGATCTTGTGGGACATGAAAGACGTATTTCTGATGTGAAATACCACCCTAGTGGCAAATTTATAGGTAGTGCCTCTCATGATATGACTTGGAGACTTTGGGATGCGTCAACACATCAAGAACTGCTGCTACAAGAAGGCCATGATAAGGGAGTGTTTAGTCTGTCTTTTCAATGCGATGGATCTCTTGTTTGTAGCGGTGGCATGGACTCGCTTTCAATGCTATGGGATATAAGATCCGGAAGTAAGGTGATGACACTCGCAGGACACTCAAAGCCTATTTACACCGTAGCTTGGTCACCAAACGGGTATCAAGTAGCCACTGGTGGTGGTGATGGAATCATTAATGT
PRP4	YPR178W.line.111.chrXVI.892332.893729_tile_4	YPR178W.line.111.chrXVI.892332.893729_tile_4	Saccharomyces cerevisiae	R64-2-1	chrXVI	893428	893866	-	CACAAAAAAAAAATCCAGGGCAAAAAAACCAGGAAATGTATAATTAAATAAATAATGCAGTGTTAATAAAACGTTAGTTTCAAAAATACTAAATACATTTCTTTACACAATCAATTCCAGAGCTTGATAGACCTATCCCATCCGCCGCTCACTAAAAAATGAGAATTATTCGAAATATCCAAGCTAATAATTTTATCAGTGTGGCCTGCTAAACTTCCCATTTTTAACCACGTATCACTACTATACACATTGATCAAATTATCATAGCCACAAGAGACAAGTTTCTTTCCGCCGTCTTCCTTTGAAAACCTTACCTGCGTAACGATGTTACGATGCGCCAATATTTGATTTAGTTGGCCTTCATCCCGTTTTCTGATGTCCCAAA
SMX3	YPR182W.line.112.chrXVI.900194.900454_tile_1	YPR182W.line.112.chrXVI.900194.900454_tile_1	Saccharomyces cerevisiae	R64-2-1	chrXVI	900166	900610	+	AATGAGCGAGAGCAGTGATATCAGCGCGATGCAGCCGGTGAACCCGAAGCCGTTCCTCAAAGGCCTGGTCAACCATCGTGTAGGCGTCAAGCTTAAGTTCAACAGCACCGAATATAGAGGTACGCTCGTGTCCACGGACAACTACTTTAACCTGCAGCTGAACGAAGCAGAAGAGTTTGTTGCGGGTGTCTCGCACGGCACCCTGGGCGAGATATTCATCCGCTGCAATAACGTGCTGTACATCAGGGAGCTGCCGAACTAAGACGACTGTGCTCATCTCCCTTACATACCAGTATATTTACATACGCCCTCTACTGTAATACAATATCATTCTATAGCACTCGCATCGCGTATTTTTTTTTTATTTTCTTGCTTTATATTGTTCTATTTT
